# Supplementary material for: Transcriptomics Comparison between Porcine Adipose and Bone Marrow Mesenchymal Stem Cells during In Vitro Osteogenic and Adipogenic Differentiation
Source: PLoS One. 2012 Mar 7;7(3):e32481. doi: 10.1371/journal.pone.0032481 (PMC3296722; doi:10.1371/journal.pone.0032481)
Supplement: File S5 — Results of functional analysis of genes differentially expressed in BMSC and ASC prior differentiations. The excel file contains 9 sheets: “Sheet 1 ASC vs BMSC FDR0.05 p<0.001” complete list of DEG between BMSC and ASC prior differentiation; “Sheet 2 Funct chart DEG>ASC” functional chart analysis results from DAVID of genes more expressed in ASC vs. BMSC; “Sheet 3 Funct cluster DEG>ASC” functional cluster analysis results from DAVID of genes more expressed in ASC vs. BMSC; “Sheet 4 IPA Func DEG>ASC vs BMSC” functional analysis results from Ingenuity Pathway Analysis of genes more expressed in ASC vs. BMSC; “Sheet 5 Effect funct DEG>ASC” effect on function analysis results from Ingenuity Pathway Analysis of genes more expressed in ASC vs. BMSC; “Sheet 6 Funct chart DEG>BMSC” functional chart analysis results from DAVID of genes more expressed in BMSC vs. ASC; “Sheet 7 Funct cluster DEG>ASC” functional cluster analysis results from DAVID of genes more expressed in BMSC vs. ASC; “Sheet 8 IPA Func DEG>ASC vs BMSC” functional analysis results from Ingenuity Pathway Analysis of genes more expressed in BMSC vs. ASC; “Sheet 9 Effect funct DEG>ASC” effect on function analysis results from Ingenuity Pathway Analysis of genes more expressed in BMSC vs. ASC. (XLSX) [file pone.0032481.s010.xlsx]

## Sheet: Sheet1 ASCvBMSC FDR0.05 p<0.001
Oligo ID	lsmdiffNorm	SEM	Pvalue	Sheffe	Expression BMSC/ASC	Corrected fold difference	FDR	GeneID	Gene Symbol				Legend
SS00005856	-4.19711	0.452655	9.98216e-10	2.33125e-05	0.0545187	-17.3423	4.58561e-05	8076	MFAP5
SS00002059	-3.76902	0.715819	1.49402e-05	0.0469763	0.0733519	-12.6329	0.0209609	2199	FBLN2
SS00007249	-3.16145	0.546063	3.69025e-06	0.0182903	0.111765	-7.94731	0.000730676	10631	POSTN	Threshold	Comparison	Total DEG	Term	Description
SS00008734	-2.99499	0.658846	0.000103196	0.149976	0.125435	-6.97227	0.000115176	6423	SFRP2	FDR = 0.05; P<0.001	ASC vs. BMSC	40	lsmdiffNorm	Least square mean of the differeneces after lowess normalization
SS00011970	-2.98759	0.547893	9.04383e-06	0.0337765	0.12608	-6.93148	0.000198362	100008589	LOC100008589		BMSC vs. ASC	25	SEM	Standard error of the mean
SS00006397	-2.23563	0.442806	2.67152e-05	0.0678995	0.212329	-3.70967	0.000790402	22998	LIMCH1				Fold change*	Fold change of BMSC (>1, larger expression in BMSC vs ASC) vs ASC (<1 larger expression in ASC)
SS00010177	-2.02189	0.369736	8.67476e-06	0.0328492	0.246235	-3.06115	0.00205051	942	CD86				Sheffe	Post-hoc correction (not used for final analysis because excessively stringent)
SS00006777	-1.98802	0.457162	0.000187476	0.20113	0.252085	-2.96691	0.00150153	115557	GEFT				Fold change	Fold difference between BMSC and ASC after backtransformation of log2 LSMdiff; 1 indicate no change
SS00004949	-1.81985	0.404784	0.000117997	0.161353	0.283251	-2.53043	0.0123808	81887	LAS1L				Correct Fold Change	As fold chenge but expressed orthodoxaly where 1/-1-fold denote 100% higher/lower in BMSC vs. ASC
SS00011832	-1.69083	0.425348	0.000472593	0.321353	0.309748	-2.22843	0.000604343	11080	DNAJB4				FDR	Benjamini-Hochberg false discovery rate P-value corrected for the overall tissue effect
SS00001914	-1.64233	0.369487	0.000135257	0.173636	0.320338	-2.12171	0.000559268	25996	REXO2				GeneID	Entrez Gene ID for all expect for the one without Entrez Gene ID used Unigene
SS00012580	-1.5902	0.317716	3.00424e-05	0.0730066	0.332126	-2.01091	0.00455102	7049	TGFBR3
SS00007444	-1.52401	0.398477	0.000702626	0.381498	0.347718	-1.87589	0.00587727	57698	KIAA1598
SS00005104	-1.50178	0.329212	9.8876e-05	0.146485	0.353117	-1.83192	0.006268	140606	SELM			* the expression ratios were highlighted as follow
SS00010091	-1.49295	0.214058	1.69875e-07	0.00183774	0.355286	-1.81463	0.0152067	1282	COL4A1			Fold change	Correct Fold change
SS00012498	-1.48852	0.373249	0.000456839	0.316496	0.356379	-1.806	0.00477677	10894	LYVE1		Higher BMSC →	8	7
SS00001263	-1.46382	0.379619	0.000646925	0.368481	0.362531	-1.75838	0.020694	2006	ELN			5	4
SS00000610	-1.45708	0.356841	0.000354934	0.281818	0.364229	-1.74553	0.00551297	5742	PTGS1			2	1
SS00002819	-1.3177	0.317373	0.00029579	0.25842	0.401175	-1.49268	0.0119401	7508	XPC			1	0
SS00007576	-1.24107	0.267416	7.99289e-05	0.130085	0.423058	-1.36374	0.0211949	199964	TMEM61		Higher ← ASC	0.5	-1
SS00006167	-1.22823	0.278667	0.000149499	0.183102	0.426841	-1.34279	0.0314918	55784	MCTP2			0.2	-4
SS00011108	-1.20042	0.323372	0.00094281	0.429747	0.435149	-1.29806	0.0100596	84886	C1orf198			0.125	-7
SS00009481	-1.19169	0.251305	6.09328e-05	0.11139	0.43779	-1.2842	0.000115692	6711	SPTBN1
SS00009867	-1.19138	0.281659	0.000240315	0.233457	0.437883	-1.28372	0.0340568	4628	MYH10
SS00006762	-1.17016	0.254626	9.02856e-05	0.139283	0.444371	-1.25037	0.049178	2317	FLNB
SS00002425	-1.15687	0.259658	0.000131517	0.171055	0.448484	-1.22974	0.020915	63893	UBE2O
SS00009040	-1.14275	0.262163	0.000170268	0.195992	0.452897	-1.20801	0.0105692	10659	CUGBP2
SS00002501	-0.993784	0.205046	4.59922e-05	0.0944462	0.502159	-0.991401	0.011936	10865	ARID5A
SS00000947	-0.977289	0.243661	0.000430037	0.307951	0.507933	-0.968762	0.00846745	2308	FOXO1
SS00005145	-0.973657	0.228396	0.000219984	0.223379	0.509214	-0.963812	0.0120488	6450	SH3BGR
SS00008359	-0.959142	0.233508	0.000332809	0.273398	0.514363	-0.944154	0.020694	10362	HMG20B
SS00009385	-0.957061	0.23664	0.000393511	0.295677	0.515105	-0.941351	0.00873535	134218	DNAJC21
SS00012694	-0.935057	0.247515	0.000794331	0.401277	0.523022	-0.911966	0.0493377	Ssc.4038	N/A
SS00003078	-0.867066	0.169166	2.17387e-05	0.0596865	0.548261	-0.823949	0.0147955	3281	HSBP1
SS00004980	-0.812421	0.165884	4.01126e-05	0.0870354	0.569425	-0.756156	0.00342349	11345	GABARAPL2
SS00006394	-0.80426	0.201802	0.000460004	0.317481	0.572656	-0.746249	0.034232	7753	ZNF202
SS00012383	-0.784444	0.141437	7.04823e-06	0.0285648	0.580576	-0.722428	0.00161205	5195	PEX14
SS00008566	-0.778742	0.209262	0.000920506	0.425713	0.582875	-0.715634	0.00342349	7533	YWHAH
SS00009688	-0.705918	0.177088	0.000458951	0.317154	0.613052	-0.631182	0.0162309	7317	UBE1
SS00006112	-0.429053	0.100453	0.000215234	0.22094	0.742749	-0.34635	0.000790402	81669	CCNL2
SS00001254	0.531407	0.132498	0.000430249	0.30802	1.44534	0.445338	0.00888089	5757	PTMA
SS00002272	0.538749	0.136916	0.000525656	0.336894	1.45271	0.452712	0.0299769	2941	GSTA4
SS00010621	0.569529	0.138162	0.000320101	0.268388	1.48404	0.484039	0.00842825	22931	RAB18
SS00009435	0.716845	0.185489	0.000632476	0.364965	1.64358	0.643584	0.000535476	84937	ZNRF1
SS00001435	0.762288	0.159267	5.41025e-05	0.103939	1.69618	0.696178	0.000819302	223	ALDH9A1
SS00001637	0.82459	0.20455	0.000407454	0.300453	1.77103	0.771031	0.00683387	79814	AGMAT
SS00008045	0.934385	0.236381	0.00050127	0.329901	1.91108	0.911075	0.00286088	159	ADSS
SS00007342	0.939758	0.234494	0.000433769	0.309163	1.91821	0.918206	0.00824209	79363	C1orf89
SS00005624	1.03134	0.225087	9.36521e-05	0.142149	2.04392	1.04392	0.00952846	223	ALDH9A1
SS00007293	1.0746	0.254623	0.000246506	0.236417	2.10613	1.10613	0.00423978	25953	PNKD
SS00005612	1.11791	0.20504	9.06158e-06	0.0338207	2.17032	1.17032	0.00569669	79583	FLJ22167
SS00012531	1.12886	0.295312	0.000706271	0.382321	2.18687	1.18687	0.000790821	Hs.578975	N/A
SS00002151	1.15927	0.227345	2.33326e-05	0.062401	2.23345	1.23345	0.0244588	55715	DOK4
SS00000675	1.44245	0.385967	0.00088317	0.41878	2.71781	1.71781	0.00205051	7422	VEGFA
SS00003774	1.45771	0.340305	0.000208266	0.217301	2.74671	1.74671	0.0314918	4522	MTHFD1
SS00008037	1.47382	0.28766	2.18581e-05	0.0598928	2.77757	1.77757	0.0100596	10144	FAM13A1
SS00005132	1.48543	0.338999	0.000160155	0.18984	2.8	1.8	0.00204046	5092	PCBD1
SS00004731	1.52715	0.348663	0.000160925	0.190317	2.88215	1.88215	0.0128107	26355	C3orf28
SS00003887	1.55072	0.403501	0.000669183	0.373782	2.92963	1.92963	0.000790402	1520	CTSS
SS00008988	1.62946	0.26686	1.60072e-06	0.0100719	3.09396	2.09396	0.000790402	22862	FNDC3A
SS00008689	1.64896	0.445675	0.000973439	0.43516	3.13608	2.13608	0.0443155	7422	VEGFA
SS00006823	1.69509	0.29056	3.2812e-06	0.0168413	3.23798	2.23798	0.000324304	3159	HMGA1
SS00008241	1.75332	0.367831	5.7025e-05	0.107183	3.37134	2.37134	0.00176341	2335	FN1
SS00008928	2.12636	0.418357	2.43925e-05	0.0641604	4.36613	3.36613	0.00026361	4359	MPZ
SS00001016	3.01601	0.461018	5.13947e-07	0.00432546	8.08927	7.08927	0.00071011	6696	SPP1
										also similar to S1PR1

## Sheet: Sheet 2 Funct chart DEG > ASC
Category	Term	Count	%	PValue	Genes	List Total	Pop Hits	Pop Total	Fold Enrichment	Bonferroni	Benjamini	FDR
UCSC_TFBS	BRACH	29	74.359	0.00237994	7753, 22998, 55784, 3281, 2317, 6423, 57698, 8076, 81669, 84886, 10631, 2199, 63893, 140606, 7049, 81887, 10659, 134218, 1282, 2308, 10865, 6711, 7317, 5195, 7508, 25996, 115557, 7533, 4628	38	4452	8618	1.47729	0.342538	0.342538	2.88163
GOTERM_MF_FAT	GO:0005201~extracellular matrix structural constituent	4	10.2564	0.00257828	2006, 1282, 2199, 8076	33	56	6445	13.9502	0.273938	0.273938	2.9371
UCSC_TFBS	HSF2	24	61.5385	0.00284781	6450, 1282, 2308, 22998, 6711, 55784, 5742, 3281, 2317, 5195, 7317, 10362, 57698, 115557, 81669, 10631, 2199, 4628, 7533, 140606, 7049, 81887, 10659, 134218	38	3309	8618	1.64489	0.394638	0.22195	3.43907
SP_PIR_KEYWORDS	extracellular matrix	5	12.8205	0.00323115	2006, 1282, 10631, 2199, 8076	38	147	8789	7.86699	0.306297	0.306297	3.60799
UCSC_TFBS	SRY	23	58.9744	0.00603292	1282, 7753, 2308, 942, 22998, 6711, 10865, 55784, 2317, 5195, 10362, 57698, 8076, 115557, 81669, 10631, 11345, 4628, 140606, 7049, 81887, 10659, 134218	38	3258	8618	1.60103	0.655276	0.298829	7.15657
GOTERM_CC_FAT	GO:0005578~proteinaceous extracellular matrix	5	12.8205	0.00642093	2006, 1282, 10631, 2199, 8076	27	187	6387	6.32501	0.47827	0.47827	6.91265
UCSC_TFBS	RFX1	30	76.9231	0.00816959	10894, 2006, 7753, 22998, 55784, 3281, 2317, 57698, 81669, 84886, 10631, 2199, 63893, 11345, 140606, 7049, 81887, 10659, 6450, 1282, 2308, 5742, 10865, 6711, 7317, 5195, 7508, 115557, 7533, 4628	38	5013	8618	1.35721	0.76396	0.302978	9.57621
GOTERM_CC_FAT	GO:0031012~extracellular matrix	5	12.8205	0.00870015	2006, 1282, 10631, 2199, 8076	27	204	6387	5.79793	0.586278	0.356788	9.25985
UCSC_TFBS	POU6F1	22	56.4103	0.00893333	10894, 6450, 7753, 2308, 942, 22998, 6711, 55784, 5195, 7317, 2317, 25996, 57698, 8076, 115557, 2199, 4628, 7533, 7049, 11080, 134218, 10659	38	3133	8618	1.59252	0.793887	0.270843	10.4269
UCSC_TFBS	FAC1	25	64.1026	0.0113513	2006, 7753, 22998, 55784, 2317, 10362, 57698, 81669, 10631, 63893, 11345, 7049, 140606, 81887, 10659, 1282, 2308, 5742, 6711, 7317, 5195, 199964, 115557, 4628, 11080	38	3870	8618	1.46505	0.865912	0.284573	13.0721
UCSC_TFBS	ISRE	23	58.9744	0.015836	10894, 2006, 1282, 7753, 2308, 942, 22998, 10865, 55784, 5195, 7317, 2317, 7508, 25996, 57698, 81669, 84886, 63893, 4628, 140606, 7049, 10659, 134218	38	3502	8618	1.48948	0.939761	0.330583	17.7891
GOTERM_MF_FAT	GO:0003779~actin binding	5	12.8205	0.0201968	22998, 6711, 4628, 7533, 2317	33	213	6445	4.58458	0.920344	0.717766	20.991
GOTERM_BP_FAT	GO:0007517~muscle organ development	4	10.2564	0.0204763	2006, 4628, 7049, 2317	30	138	6781	6.55169	0.999972	0.999972	25.8077
INTERPRO	IPR001715:Calponin-like actin-binding	3	7.69231	0.0215238	22998, 6711, 2317	35	54	8066	12.8032	0.919863	0.919863	21.9829
UCSC_TFBS	HNF1	26	66.6667	0.0239894	2006, 22998, 55784, 2317, 3281, 6423, 57698, 81669, 10631, 63893, 11345, 7049, 140606, 10659, 6450, 1282, 2308, 5742, 6711, 5195, 7508, 25996, 115557, 7533, 4628, 11080	38	4318	8618	1.36557	0.986068	0.413862	25.7675
GOTERM_MF_FAT	GO:0008092~cytoskeletal protein binding	6	15.3846	0.0260924	22998, 6711, 11345, 4628, 7533, 2317	33	345	6445	3.39657	0.962312	0.664725	26.3098
UCSC_TFBS	CDPCR3HD	23	58.9744	0.0271023	6450, 1282, 22998, 6711, 55784, 5742, 2317, 5195, 7317, 10362, 6423, 7508, 25996, 57698, 115557, 81669, 84886, 10631, 2199, 4628, 7049, 81887, 10659	38	3655	8618	1.42713	0.99206	0.415686	28.6212
UP_TISSUE	Placenta	15	38.4615	0.0272446	10894, 2006, 1282, 2308, 55784, 5195, 7317, 2317, 10362, 57698, 25996, 81669, 10631, 7049, 81887	38	1962	8634	1.73708	0.809358	0.809358	24.1813
UCSC_TFBS	TBP	18	46.1538	0.0281935	1282, 7753, 2308, 22998, 6711, 55784, 5195, 2317, 6423, 57698, 8076, 115557, 63893, 4628, 7533, 7049, 11080, 10659	38	2576	8618	1.58471	0.993483	0.395488	29.5974
UCSC_TFBS	TAXCREB	27	69.2308	0.0290042	2006, 22998, 55784, 2317, 10362, 6423, 8076, 84886, 2199, 63893, 11345, 140606, 10659, 6450, 1282, 2308, 5742, 10865, 6711, 7317, 5195, 7508, 25996, 199964, 115557, 7533, 4628	38	4618	8618	1.32597	0.994373	0.375579	30.3147
GOTERM_BP_FAT	GO:0030036~actin cytoskeleton organization	4	10.2564	0.0300691	2006, 22998, 4628, 2317	30	160	6781	5.65083	1	0.999565	35.6292
UP_SEQ_FEATURE	compositionally biased region:Ala-rich	3	7.69231	0.0312912	2006, 63893, 10659	38	66	8782	10.5048	0.998425	0.998425	32.9305
GOTERM_CC_FAT	GO:0030017~sarcomere	3	7.69231	0.0324873	115557, 6711, 2317	27	70	6387	10.1381	0.96441	0.671067	30.7372
UCSC_TFBS	AP1FJ	17	43.5897	0.0326407	2006, 2308, 942, 22998, 6711, 10865, 5742, 5195, 7317, 7508, 115557, 81669, 2199, 63893, 11345, 7049, 10659	38	2408	8618	1.60109	0.997093	0.38536	33.4506
UCSC_TFBS	ARNT	24	61.5385	0.0340792	10894, 6450, 7753, 22998, 6711, 10865, 5195, 7317, 2317, 10362, 6423, 7508, 25996, 57698, 115557, 81669, 2199, 11345, 4628, 7533, 140606, 81887, 134218, 10659	38	3955	8618	1.37622	0.997763	0.374638	34.6548
SMART	SM00033:CH	3	7.69231	0.0357241	22998, 6711, 2317	25	54	4306	9.56889	0.687794	0.687794	27.0256
GOTERM_BP_FAT	GO:0030029~actin filament-based process	4	10.2564	0.0372234	2006, 22998, 4628, 2317	30	174	6781	5.19617	1	0.998356	42.1509
UCSC_TFBS	SOX5	23	58.9744	0.0377436	2006, 1282, 7753, 2308, 942, 22998, 6711, 55784, 5195, 7317, 2317, 6423, 57698, 115557, 10631, 2199, 11345, 4628, 140606, 7049, 11080, 81887, 10659	38	3757	8618	1.38838	0.998854	0.383488	37.6327
UCSC_TFBS	STAT1	21	53.8462	0.0386431	10894, 2006, 1282, 7753, 22998, 6711, 10865, 55784, 5195, 2317, 6423, 115557, 81669, 63893, 11345, 4628, 7049, 11080, 81887, 134218, 10659	38	3314	8618	1.43711	0.999028	0.370233	38.3443
GOTERM_CC_FAT	GO:0030016~myofibril	3	7.69231	0.0386862	115557, 6711, 2317	27	77	6387	9.21645	0.981406	0.630728	35.515
SP_PIR_KEYWORDS	disulfide bond	10	25.641	0.0389308	10894, 81669, 2006, 1282, 942, 10631, 2199, 5742, 6423, 8076	38	1120	8789	2.06508	0.988747	0.893919	36.2924
GOTERM_CC_FAT	GO:0044449~contractile fiber part	3	7.69231	0.0424168	115557, 6711, 2317	27	81	6387	8.76132	0.987445	0.583355	38.2438
UP_TISSUE	Epithelium	13	33.3333	0.0424684	22998, 6711, 55784, 5195, 7317, 2317, 6423, 7508, 57698, 81669, 4628, 81887, 134218	38	1679	8634	1.75922	0.926007	0.727984	35.2674
UCSC_TFBS	NFE2	19	48.7179	0.0429277	1282, 22998, 6711, 10865, 5742, 55784, 5195, 7317, 2317, 25996, 57698, 115557, 84886, 63893, 11345, 4628, 7049, 81887, 10659	38	2909	8618	1.48127	0.999557	0.382848	41.6329
UCSC_TFBS	GATA2	19	48.7179	0.0430688	2006, 1282, 6711, 5195, 7317, 2317, 10362, 6423, 115557, 81669, 84886, 2199, 63893, 4628, 7533, 7049, 81887, 134218, 10659	38	2910	8618	1.48076	0.999568	0.366044	41.7384
UCSC_TFBS	LYF1	20	51.2821	0.043578	6450, 2006, 1282, 7753, 942, 22998, 6711, 55784, 5195, 7317, 2317, 10362, 57698, 115557, 84886, 2199, 4628, 7049, 81887, 10659	38	3131	8618	1.44867	0.999607	0.353162	42.1177
UCSC_TFBS	AML1	33	84.6154	0.0440875	10894, 2006, 942, 22998, 55784, 2317, 6423, 57698, 8076, 81669, 84886, 10631, 2199, 63893, 11345, 140606, 7049, 81887, 10659, 134218, 1282, 2308, 5742, 10865, 6711, 7317, 5195, 7508, 25996, 115557, 7533, 4628, 11080	38	6311	8618	1.18587	0.999642	0.341418	42.495
GOTERM_CC_FAT	GO:0043292~contractile fiber	3	7.69231	0.0443314	115557, 6711, 2317	27	83	6387	8.5502	0.989743	0.533871	39.6031
GOTERM_BP_FAT	GO:0014706~striated muscle tissue development	3	7.69231	0.0464706	2006, 4628, 7049	30	81	6781	8.3716	1	0.997598	49.6707
UP_TISSUE	Skeletal muscle	5	12.8205	0.0481572	22998, 6711, 2317, 25996, 8076	38	323	8634	3.51719	0.94825	0.627347	39.0199
UCSC_TFBS	GATA3	14	35.8974	0.0484495	1282, 7753, 22998, 6711, 10865, 5742, 7317, 2317, 81669, 10631, 63893, 4628, 81887, 10659	38	1906	8618	1.66582	0.99984	0.354048	45.6335
GOTERM_BP_FAT	GO:0045892~negative regulation of transcription, DNA-dependent	4	10.2564	0.0494605	7753, 10865, 3281, 5195	30	195	6781	4.63658	1	0.994163	51.9004
GOTERM_CC_FAT	GO:0044421~extracellular region part	6	15.3846	0.0505383	2006, 1282, 10631, 2199, 7049, 8076	27	507	6387	2.79947	0.994688	0.526814	43.8246
GOTERM_BP_FAT	GO:0060537~muscle tissue development	3	7.69231	0.0506723	2006, 4628, 7049	30	85	6781	7.97765	1	0.98765	52.7776
GOTERM_BP_FAT	GO:0022604~regulation of cell morphogenesis	3	7.69231	0.0517437	4628, 7049, 7533	30	86	6781	7.88488	1	0.978681	53.5408
GOTERM_BP_FAT	GO:0045449~regulation of transcription	10	25.641	0.0526311	81669, 7753, 942, 2308, 10865, 7049, 3281, 7533, 5195, 10362	30	1182	6781	1.9123	1	0.967499	54.1642
GOTERM_BP_FAT	GO:0051253~negative regulation of RNA metabolic process	4	10.2564	0.0526348	7753, 10865, 3281, 5195	30	200	6781	4.52067	1	0.95245	54.1668
SP_PIR_KEYWORDS	signal	11	28.2051	0.053903	10894, 2006, 1282, 942, 10631, 2199, 5742, 7049, 140606, 6423, 8076	38	1378	8789	1.84629	0.998091	0.875956	46.6952
UP_SEQ_FEATURE	signal peptide	11	28.2051	0.0541518	10894, 2006, 1282, 942, 10631, 2199, 5742, 7049, 140606, 6423, 8076	38	1378	8782	1.84482	0.999988	0.996485	50.3169
GOTERM_CC_FAT	GO:0005938~cell cortex	3	7.69231	0.0543737	6711, 4628, 2317	27	93	6387	7.63082	0.996471	0.506305	46.2971
UP_SEQ_FEATURE	compositionally biased region:Glu-rich (acidic)	2	5.12821	0.0574372	6450, 7508	38	14	8782	33.015	0.999994	0.981733	52.4423
GOTERM_MF_FAT	GO:0015026~coreceptor activity	2	5.12821	0.0580289	942, 7049	33	12	6445	32.5505	0.999397	0.843265	49.8581
GOTERM_BP_FAT	GO:0051129~negative regulation of cellular component organization	3	7.69231	0.0583422	6711, 7049, 7533	30	92	6781	7.37065	1	0.952534	57.9936
UCSC_TFBS	SOX9	21	53.8462	0.0613565	10894, 1282, 22998, 6711, 55784, 3281, 5195, 7317, 2317, 57698, 115557, 84886, 2199, 63893, 11345, 4628, 7533, 140606, 7049, 81887, 10659	38	3465	8618	1.37448	0.999986	0.411794	54.0221
UP_SEQ_FEATURE	domain:Actin-binding	2	5.12821	0.0614148	6711, 2317	38	15	8782	30.814	0.999997	0.95991	54.9032
UCSC_TFBS	HNF4	23	58.9744	0.062993	2006, 1282, 7753, 942, 22998, 6711, 10865, 5742, 5195, 7317, 6423, 7508, 57698, 8076, 115557, 199964, 81669, 63893, 4628, 140606, 7049, 10659, 134218	38	3929	8618	1.3276	0.999989	0.405786	54.9962
UCSC_TFBS	AP2REP	22	56.4103	0.0644363	2006, 1282, 22998, 6711, 10865, 55784, 5195, 7317, 2317, 57698, 8076, 115557, 81669, 2199, 63893, 11345, 4628, 7533, 7049, 81887, 10659, 134218	38	3708	8618	1.34557	0.999992	0.399313	55.8395
UCSC_TFBS	NMYC	17	43.5897	0.0646567	7753, 2308, 55784, 5742, 5195, 7317, 2317, 6423, 7508, 57698, 115557, 2199, 63893, 4628, 81887, 134218, 10659	38	2609	8618	1.47774	0.999992	0.387479	55.967
GOTERM_MF_FAT	GO:0005539~glycosaminoglycan binding	3	7.69231	0.0647174	10894, 10631, 7049	33	84	6445	6.97511	0.999751	0.809724	53.8189
GOTERM_MF_FAT	GO:0030528~transcription regulator activity	8	20.5128	0.0687258	7753, 942, 2308, 10865, 3281, 7533, 5195, 10362	33	745	6445	2.09721	0.999854	0.770419	56.0534
INTERPRO	IPR001589:Actinin-type, actin-binding, conserved site	2	5.12821	0.0693591	6711, 2317	35	17	8066	27.1126	0.999761	0.984534	55.9606
UCSC_TFBS	OLF1	22	56.4103	0.071257	2006, 1282, 2308, 22998, 6711, 10865, 5195, 7317, 2317, 10362, 6423, 25996, 115557, 81669, 84886, 2199, 63893, 11345, 4628, 140606, 7049, 10659	38	3744	8618	1.33263	0.999998	0.405729	59.6319
UCSC_TFBS	HAND1E47	22	56.4103	0.0714539	2006, 1282, 2308, 942, 22998, 6711, 10865, 55784, 5195, 7317, 2317, 6423, 25996, 57698, 8076, 115557, 81669, 63893, 7533, 140606, 7049, 10659	38	3745	8618	1.33227	0.999998	0.394584	59.7368
GOTERM_MF_FAT	GO:0030247~polysaccharide binding	3	7.69231	0.073012	10894, 10631, 7049	33	90	6445	6.5101	0.999917	0.738939	58.3332
GOTERM_MF_FAT	GO:0001871~pattern binding	3	7.69231	0.073012	10894, 10631, 7049	33	90	6445	6.5101	0.999917	0.738939	58.3332
UP_SEQ_FEATURE	disulfide bond	9	23.0769	0.0733772	10894, 81669, 2006, 1282, 942, 10631, 2199, 5742, 6423	38	1070	8782	1.94388	1	0.954683	61.6159
BIOCARTA	h_aktPathway:AKT Signaling Pathway	2	5.12821	0.0757216	2308, 7533	6	15	962	21.3778	0.792959	0.792959	45.0803
UP_SEQ_FEATURE	domain:CH 2	2	5.12821	0.0771621	6711, 2317	38	19	8782	24.3269	1	0.933919	63.5399
UP_SEQ_FEATURE	domain:CH 1	2	5.12821	0.0771621	6711, 2317	38	19	8782	24.3269	1	0.933919	63.5399
SP_PIR_KEYWORDS	Secreted	7	17.9487	0.0779158	2006, 1282, 10631, 2199, 7049, 6423, 8076	38	720	8789	2.24865	0.999896	0.898896	60.1898
UCSC_TFBS	RORA2	22	56.4103	0.080742	1282, 7753, 2308, 22998, 6711, 55784, 5742, 3281, 5195, 7317, 2317, 57698, 115557, 81669, 84886, 10631, 63893, 11345, 4628, 7049, 81887, 10659	38	3790	8618	1.31646	1	0.422348	64.4097
INTERPRO	IPR015609:Molecular chaperone, heat shock protein, Hsp40, DnaJ	2	5.12821	0.0811042	11080, 134218	35	20	8066	23.0457	0.999945	0.962014	61.9012
UCSC_TFBS	NFKAPPAB50	13	33.3333	0.0819218	6450, 1282, 942, 55784, 7317, 2317, 57698, 199964, 81669, 63893, 11345, 140606, 10659	38	1853	8618	1.59108	1	0.415651	64.9662
UCSC_TFBS	GFI1	21	53.8462	0.0827403	6450, 2006, 1282, 2308, 22998, 6711, 5195, 7317, 2317, 10362, 6423, 7508, 57698, 8076, 115557, 81669, 84886, 7533, 7049, 81887, 10659	38	3572	8618	1.33331	1	0.407938	65.3476
UCSC_TFBS	CDC5	20	51.2821	0.0853468	1282, 2308, 22998, 6711, 10865, 55784, 3281, 5195, 7317, 2317, 25996, 57698, 8076, 115557, 10631, 4628, 7049, 11080, 10659, 134218	38	3359	8618	1.35034	1	0.407478	66.5367
UCSC_TFBS	PPARA	25	64.1026	0.0856397	7753, 22998, 55784, 2317, 10362, 57698, 10631, 2199, 63893, 11345, 7049, 10659, 134218, 1282, 2308, 5742, 10865, 6711, 7317, 5195, 7508, 25996, 199964, 115557, 4628	38	4511	8618	1.25687	1	0.398484	66.668
UCSC_TFBS	OCT	21	53.8462	0.0865843	1282, 7753, 2308, 942, 22998, 6711, 55784, 2317, 5195, 7317, 6423, 7508, 57698, 8076, 115557, 199964, 81669, 63893, 4628, 7049, 10659	38	3589	8618	1.32699	1	0.392318	67.0881
GOTERM_BP_FAT	GO:0031032~actomyosin structure organization	2	5.12821	0.0901129	22998, 4628	30	22	6781	20.5485	1	0.987127	74.3995
UCSC_TFBS	POU3F2	25	64.1026	0.0924769	10894, 7753, 942, 22998, 55784, 2317, 57698, 81669, 10631, 63893, 11345, 7049, 140606, 81887, 10659, 134218, 6450, 1282, 2308, 6711, 7317, 5195, 115557, 7533, 4628	38	4541	8618	1.24857	1	0.404007	69.6009
UCSC_TFBS	LMO2COM	26	66.6667	0.0944073	10894, 2006, 7753, 942, 22998, 55784, 2317, 3281, 6423, 57698, 81669, 10631, 63893, 7049, 140606, 81887, 10659, 134218, 1282, 2308, 6711, 7317, 5195, 7508, 115557, 4628	38	4788	8618	1.23152	1	0.4015	70.3849
SP_PIR_KEYWORDS	polymorphism	27	69.2308	0.0944859	10894, 2006, 942, 7753, 22998, 55784, 2317, 6423, 8076, 84886, 10631, 2199, 63893, 11345, 7049, 81887, 10659, 134218, 6450, 1282, 5742, 6711, 7317, 5195, 7508, 199964, 115557	38	5130	8789	1.21731	0.999987	0.893871	67.5977
UCSC_TFBS	HMX1	22	56.4103	0.0952001	2006, 7753, 22998, 6711, 55784, 5195, 7317, 2317, 6423, 7508, 25996, 57698, 115557, 84886, 2199, 63893, 4628, 7533, 140606, 7049, 81887, 10659	38	3853	8618	1.29493	1	0.395326	70.7015
UCSC_TFBS	CREL	10	25.641	0.0952361	6450, 2006, 1282, 2199, 55784, 63893, 11345, 5195, 6423, 57698	38	1302	8618	1.74185	1	0.386936	70.7158
GOTERM_BP_FAT	GO:0016481~negative regulation of transcription	4	10.2564	0.0954359	7753, 10865, 3281, 5195	30	257	6781	3.51803	1	0.98556	76.4776
UCSC_TFBS	PAX3	21	53.8462	0.095888	10894, 7753, 2308, 942, 22998, 6711, 10865, 55784, 5195, 7317, 2317, 7508, 57698, 115557, 2199, 63893, 4628, 7533, 81887, 10659, 134218	38	3628	8618	1.31273	1	0.380901	70.9737
SP_PIR_KEYWORDS	alternative splicing	21	53.8462	0.0961431	2006, 1282, 7753, 942, 22998, 6711, 55784, 5742, 5195, 2317, 10362, 25996, 57698, 115557, 81669, 10631, 2199, 4628, 81887, 134218, 10659	38	3701	8789	1.31237	0.999989	0.850992	68.2647
UP_SEQ_FEATURE	domain:J	2	5.12821	0.0964852	11080, 134218	38	24	8782	19.2588	1	0.947262	72.0522
INTERPRO	IPR018253:Heat shock protein DnaJ, conserved site	2	5.12821	0.0965408	11080, 134218	35	24	8066	19.2048	0.999992	0.947356	68.5972
INTERPRO	IPR001623:Heat shock protein DnaJ, N-terminal	2	5.12821	0.0965408	11080, 134218	35	24	8066	19.2048	0.999992	0.947356	68.5972
UCSC_TFBS	AREB6	34	87.1795	0.0973836	10894, 2006, 942, 7753, 22998, 55784, 3281, 2317, 6423, 57698, 8076, 81669, 10631, 2199, 63893, 11345, 140606, 7049, 81887, 10659, 134218, 1282, 2308, 5742, 10865, 6711, 7317, 5195, 7508, 25996, 115557, 199964, 7533, 4628	38	6848	8618	1.126	1	0.377829	71.5574
UCSC_TFBS	MRF2	23	58.9744	0.0987644	10894, 6450, 1282, 7753, 2308, 942, 22998, 6711, 10865, 5742, 2317, 5195, 7317, 7508, 57698, 8076, 81669, 11345, 4628, 7533, 7049, 81887, 10659	38	4098	8618	1.27285	1	0.374549	72.0868
GOTERM_MF_FAT	GO:0050840~extracellular matrix binding	2	5.12821	0.0993959	2006, 2199	33	21	6445	18.6003	0.999998	0.802632	70.1473

## Sheet: Sheet 3 Funct cluster DEG > ASC
Annotation Cluster 1	Enrichment Score: 1.541932468365663
Category	Term	Count	%	PValue	Genes	List Total	Pop Hits	Pop Total	Fold Enrichment	Bonferroni	Benjamini	FDR
GOTERM_MF_FAT	GO:0003779~actin binding	5	12.8205	0.0201968	22998, 6711, 4628, 7533, 2317	33	213	6445	4.58458	0.920344	0.717766	20.991
INTERPRO	IPR001715:Calponin-like actin-binding	3	7.69231	0.0215238	22998, 6711, 2317	35	54	8066	12.8032	0.919863	0.919863	21.9829
GOTERM_MF_FAT	GO:0008092~cytoskeletal protein binding	6	15.3846	0.0260924	22998, 6711, 11345, 4628, 7533, 2317	33	345	6445	3.39657	0.962312	0.664725	26.3098
SMART	SM00033:CH	3	7.69231	0.0357241	22998, 6711, 2317	25	54	4306	9.56889	0.687794	0.687794	27.0256
UP_TISSUE	Skeletal muscle	5	12.8205	0.0481572	22998, 6711, 2317, 25996, 8076	38	323	8634	3.51719	0.94825	0.627347	39.0199
Annotation Cluster 2	Enrichment Score: 1.4642798540004394
Category	Term	Count	%	PValue	Genes	List Total	Pop Hits	Pop Total	Fold Enrichment	Bonferroni	Benjamini	FDR
UCSC_TFBS	RFX1	30	76.9231	0.00816959	10894, 2006, 7753, 22998, 55784, 3281, 2317, 57698, 81669, 84886, 10631, 2199, 63893, 11345, 140606, 7049, 81887, 10659, 6450, 1282, 2308, 5742, 10865, 6711, 7317, 5195, 7508, 115557, 7533, 4628	38	5013	8618	1.35721	0.76396	0.302978	9.57621
UCSC_TFBS	SOX9	21	53.8462	0.0613565	10894, 1282, 22998, 6711, 55784, 3281, 5195, 7317, 2317, 57698, 115557, 84886, 2199, 63893, 11345, 4628, 7533, 140606, 7049, 81887, 10659	38	3465	8618	1.37448	0.999986	0.411794	54.0221
UCSC_TFBS	RORA2	22	56.4103	0.080742	1282, 7753, 2308, 22998, 6711, 55784, 5742, 3281, 5195, 7317, 2317, 57698, 115557, 81669, 84886, 10631, 63893, 11345, 4628, 7049, 81887, 10659	38	3790	8618	1.31646	1	0.422348	64.4097
Annotation Cluster 3	Enrichment Score: 1.4221641907904998
Category	Term	Count	%	PValue	Genes	List Total	Pop Hits	Pop Total	Fold Enrichment	Bonferroni	Benjamini	FDR
UCSC_TFBS	BRACH	29	74.359	0.00237994	7753, 22998, 55784, 3281, 2317, 6423, 57698, 8076, 81669, 84886, 10631, 2199, 63893, 140606, 7049, 81887, 10659, 134218, 1282, 2308, 10865, 6711, 7317, 5195, 7508, 25996, 115557, 7533, 4628	38	4452	8618	1.47729	0.342538	0.342538	2.88163
UCSC_TFBS	MEF2	30	76.9231	0.113162	2006, 942, 7753, 22998, 55784, 2317, 6423, 57698, 8076, 81669, 84886, 10631, 2199, 63893, 140606, 7049, 81887, 10659, 134218, 1282, 2308, 10865, 6711, 7317, 5195, 25996, 115557, 7533, 4628, 11080	38	5847	8618	1.16362	1	0.388318	77.0921
UCSC_TFBS	GATA1	32	82.0513	0.201021	942, 7753, 22998, 55784, 3281, 2317, 6423, 57698, 8076, 81669, 84886, 10631, 2199, 63893, 140606, 7049, 81887, 10659, 134218, 6450, 1282, 2308, 5742, 10865, 6711, 7317, 5195, 25996, 115557, 199964, 7533, 4628	38	6596	8618	1.10025	1	0.426679	93.6322
Annotation Cluster 4	Enrichment Score: 1.3987821995526928
Category	Term	Count	%	PValue	Genes	List Total	Pop Hits	Pop Total	Fold Enrichment	Bonferroni	Benjamini	FDR
GOTERM_MF_FAT	GO:0005201~extracellular matrix structural constituent	4	10.2564	0.00257828	2006, 1282, 2199, 8076	33	56	6445	13.9502	0.273938	0.273938	2.9371
SP_PIR_KEYWORDS	extracellular matrix	5	12.8205	0.00323115	2006, 1282, 10631, 2199, 8076	38	147	8789	7.86699	0.306297	0.306297	3.60799
GOTERM_CC_FAT	GO:0005578~proteinaceous extracellular matrix	5	12.8205	0.00642093	2006, 1282, 10631, 2199, 8076	27	187	6387	6.32501	0.47827	0.47827	6.91265
GOTERM_CC_FAT	GO:0031012~extracellular matrix	5	12.8205	0.00870015	2006, 1282, 10631, 2199, 8076	27	204	6387	5.79793	0.586278	0.356788	9.25985
SP_PIR_KEYWORDS	disulfide bond	10	25.641	0.0389308	10894, 81669, 2006, 1282, 942, 10631, 2199, 5742, 6423, 8076	38	1120	8789	2.06508	0.988747	0.893919	36.2924
GOTERM_CC_FAT	GO:0044421~extracellular region part	6	15.3846	0.0505383	2006, 1282, 10631, 2199, 7049, 8076	27	507	6387	2.79947	0.994688	0.526814	43.8246
SP_PIR_KEYWORDS	signal	11	28.2051	0.053903	10894, 2006, 1282, 942, 10631, 2199, 5742, 7049, 140606, 6423, 8076	38	1378	8789	1.84629	0.998091	0.875956	46.6952
UP_SEQ_FEATURE	signal peptide	11	28.2051	0.0541518	10894, 2006, 1282, 942, 10631, 2199, 5742, 7049, 140606, 6423, 8076	38	1378	8782	1.84482	0.999988	0.996485	50.3169
UP_SEQ_FEATURE	disulfide bond	9	23.0769	0.0733772	10894, 81669, 2006, 1282, 942, 10631, 2199, 5742, 6423	38	1070	8782	1.94388	1	0.99424	61.6159
SP_PIR_KEYWORDS	Secreted	7	17.9487	0.0779158	2006, 1282, 10631, 2199, 7049, 6423, 8076	38	720	8789	2.24865	0.999896	0.898896	60.1898
GOTERM_MF_FAT	GO:0005198~structural molecule activity	5	12.8205	0.114187	2006, 1282, 2199, 6711, 8076	33	377	6445	2.59023	1	0.883264	75.3432
GOTERM_CC_FAT	GO:0005576~extracellular region	7	17.9487	0.129292	2006, 1282, 10631, 2199, 7049, 6423, 8076	27	864	6387	1.91654	0.999999	0.788535	78.5525
SP_PIR_KEYWORDS	glycoprotein	10	25.641	0.300775	10894, 81669, 1282, 942, 10631, 2199, 5742, 6711, 7049, 8076	38	1737	8789	1.33155	1	0.974661	98.2792
UP_SEQ_FEATURE	glycosylation site:N-linked (GlcNAc...)	9	23.0769	0.38502	10894, 81669, 1282, 942, 10631, 2199, 5742, 7049, 8076	38	1639	8782	1.26903	1	0.999999	99.7776
Annotation Cluster 5	Enrichment Score: 1.322095086225248
Category	Term	Count	%	PValue	Genes	List Total	Pop Hits	Pop Total	Fold Enrichment	Bonferroni	Benjamini	FDR
GOTERM_BP_FAT	GO:0007517~muscle organ development	4	10.2564	0.0204763	2006, 4628, 7049, 2317	30	138	6781	6.55169	0.999972	0.999972	25.8077
GOTERM_BP_FAT	GO:0014706~striated muscle tissue development	3	7.69231	0.0464706	2006, 4628, 7049	30	81	6781	8.3716	1	0.997598	49.6707
GOTERM_BP_FAT	GO:0060537~muscle tissue development	3	7.69231	0.0506723	2006, 4628, 7049	30	85	6781	7.97765	1	0.98765	52.7776
GOTERM_BP_FAT	GO:0008283~cell proliferation	4	10.2564	0.106763	2006, 942, 4628, 7049	30	270	6781	3.34864	1	0.991521	80.3881
Annotation Cluster 6	Enrichment Score: 1.24663157825668
Category	Term	Count	%	PValue	Genes	List Total	Pop Hits	Pop Total	Fold Enrichment	Bonferroni	Benjamini	FDR
GOTERM_MF_FAT	GO:0003779~actin binding	5	12.8205	0.0201968	22998, 6711, 4628, 7533, 2317	33	213	6445	4.58458	0.920344	0.717766	20.991
GOTERM_MF_FAT	GO:0008092~cytoskeletal protein binding	6	15.3846	0.0260924	22998, 6711, 11345, 4628, 7533, 2317	33	345	6445	3.39657	0.962312	0.664725	26.3098
GOTERM_BP_FAT	GO:0030036~actin cytoskeleton organization	4	10.2564	0.0300691	2006, 22998, 4628, 2317	30	160	6781	5.65083	1	0.999565	35.6292
GOTERM_BP_FAT	GO:0030029~actin filament-based process	4	10.2564	0.0372234	2006, 22998, 4628, 2317	30	174	6781	5.19617	1	0.998356	42.1509
GOTERM_BP_FAT	GO:0007010~cytoskeleton organization	4	10.2564	0.124239	2006, 22998, 4628, 2317	30	289	6781	3.12849	1	0.991805	85.253
UCSC_TFBS	CREBP1CJUN	6	15.3846	0.452084	1282, 2199, 22998, 63893, 4628, 2317	38	1023	8618	1.33014	1	0.595467	99.9378
Annotation Cluster 7	Enrichment Score: 1.1356001658350052
Category	Term	Count	%	PValue	Genes	List Total	Pop Hits	Pop Total	Fold Enrichment	Bonferroni	Benjamini	FDR
GOTERM_CC_FAT	GO:0030017~sarcomere	3	7.69231	0.0324873	115557, 6711, 2317	27	70	6387	10.1381	0.96441	0.671067	30.7372
GOTERM_CC_FAT	GO:0030016~myofibril	3	7.69231	0.0386862	115557, 6711, 2317	27	77	6387	9.21645	0.981406	0.630728	35.515
GOTERM_CC_FAT	GO:0044449~contractile fiber part	3	7.69231	0.0424168	115557, 6711, 2317	27	81	6387	8.76132	0.987445	0.583355	38.2438
GOTERM_CC_FAT	GO:0043292~contractile fiber	3	7.69231	0.0443314	115557, 6711, 2317	27	83	6387	8.5502	0.989743	0.533871	39.6031
SP_PIR_KEYWORDS	cytoplasm	7	17.9487	0.888138	115557, 2308, 6711, 140606, 2317, 11080, 10659	38	2034	8789	0.795981	1	0.99995	100
Annotation Cluster 8	Enrichment Score: 1.0216597623311794
Category	Term	Count	%	PValue	Genes	List Total	Pop Hits	Pop Total	Fold Enrichment	Bonferroni	Benjamini	FDR
GOTERM_MF_FAT	GO:0005539~glycosaminoglycan binding	3	7.69231	0.0647174	10894, 10631, 7049	33	84	6445	6.97511	0.999751	0.874331	53.8189
GOTERM_MF_FAT	GO:0030247~polysaccharide binding	3	7.69231	0.073012	10894, 10631, 7049	33	90	6445	6.5101	0.999917	0.791296	58.3332
GOTERM_MF_FAT	GO:0001871~pattern binding	3	7.69231	0.073012	10894, 10631, 7049	33	90	6445	6.5101	0.999917	0.791296	58.3332
GOTERM_MF_FAT	GO:0030246~carbohydrate binding	3	7.69231	0.237439	10894, 10631, 7049	33	187	6445	3.1332	1	0.976121	95.6291
Annotation Cluster 9	Enrichment Score: 0.8507539290608115
Category	Term	Count	%	PValue	Genes	List Total	Pop Hits	Pop Total	Fold Enrichment	Bonferroni	Benjamini	FDR
UCSC_TFBS	TAXCREB	27	69.2308	0.0290042	2006, 22998, 55784, 2317, 10362, 6423, 8076, 84886, 2199, 63893, 11345, 140606, 10659, 6450, 1282, 2308, 5742, 10865, 6711, 7317, 5195, 7508, 25996, 199964, 115557, 7533, 4628	38	4618	8618	1.32597	0.994373	0.375579	30.3147
UCSC_TFBS	HEN1	26	66.6667	0.107413	2006, 22998, 55784, 2317, 10362, 57698, 2199, 63893, 11345, 7049, 140606, 81887, 10659, 1282, 2308, 5742, 10865, 6711, 7317, 5195, 7508, 25996, 199964, 115557, 7533, 4628	38	4840	8618	1.21829	1	0.37884	75.2016
UCSC_TFBS	PAX2	26	66.6667	0.119405	22998, 55784, 2317, 10362, 6423, 8076, 2199, 63893, 11345, 7049, 140606, 10659, 134218, 6450, 1282, 2308, 5742, 6711, 7317, 5195, 7508, 25996, 199964, 115557, 7533, 4628	38	4884	8618	1.20731	1	0.360837	78.9945
UCSC_TFBS	AP1	25	64.1026	0.200789	10894, 2006, 22998, 55784, 2317, 57698, 8076, 84886, 2199, 63893, 11345, 7049, 140606, 10659, 1282, 2308, 5742, 10865, 6711, 7317, 5195, 7508, 25996, 7533, 4628	38	4884	8618	1.16088	1	0.430803	93.6095
UCSC_TFBS	NRSF	23	58.9744	0.230596	6450, 2006, 1282, 2308, 22998, 6711, 10865, 55784, 5742, 2317, 5195, 7317, 10362, 6423, 7508, 57698, 8076, 115557, 63893, 11345, 4628, 140606, 10659	38	4486	8618	1.16276	1	0.455049	95.9916
UCSC_TFBS	ROAZ	18	46.1538	0.456398	1282, 2308, 22998, 10865, 5742, 55784, 5195, 7317, 2317, 7508, 25996, 115557, 2199, 63893, 4628, 140606, 7049, 10659	38	3771	8618	1.08253	1	0.59404	99.9436
Annotation Cluster 10	Enrichment Score: 0.8431724206971073
Category	Term	Count	%	PValue	Genes	List Total	Pop Hits	Pop Total	Fold Enrichment	Bonferroni	Benjamini	FDR
GOTERM_BP_FAT	GO:0045892~negative regulation of transcription, DNA-dependent	4	10.2564	0.0494605	7753, 10865, 3281, 5195	30	195	6781	4.63658	1	0.994163	51.9004
GOTERM_BP_FAT	GO:0045449~regulation of transcription	10	25.641	0.0526311	81669, 7753, 942, 2308, 10865, 7049, 3281, 7533, 5195, 10362	30	1182	6781	1.9123	1	0.967499	54.1642
GOTERM_BP_FAT	GO:0051253~negative regulation of RNA metabolic process	4	10.2564	0.0526348	7753, 10865, 3281, 5195	30	200	6781	4.52067	1	0.95245	54.1668
GOTERM_MF_FAT	GO:0030528~transcription regulator activity	8	20.5128	0.0687258	7753, 942, 2308, 10865, 3281, 7533, 5195, 10362	33	745	6445	2.09721	0.999854	0.82895	56.0534
GOTERM_BP_FAT	GO:0016481~negative regulation of transcription	4	10.2564	0.0954359	7753, 10865, 3281, 5195	30	257	6781	3.51803	1	0.990177	76.4776
GOTERM_BP_FAT	GO:0045934~negative regulation of nucleobase, nucleoside, nucleotide and nucleic acid metabolic process	4	10.2564	0.124239	7753, 10865, 3281, 5195	30	289	6781	3.12849	1	0.991805	85.253
GOTERM_BP_FAT	GO:0010629~negative regulation of gene expression	4	10.2564	0.124239	7753, 10865, 3281, 5195	30	289	6781	3.12849	1	0.991805	85.253
GOTERM_BP_FAT	GO:0051172~negative regulation of nitrogen compound metabolic process	4	10.2564	0.12805	7753, 10865, 3281, 5195	30	293	6781	3.08578	1	0.990259	86.1522
GOTERM_BP_FAT	GO:0010558~negative regulation of macromolecule biosynthetic process	4	10.2564	0.143716	7753, 10865, 3281, 5195	30	309	6781	2.926	1	0.992675	89.3396
GOTERM_BP_FAT	GO:0031327~negative regulation of cellular biosynthetic process	4	10.2564	0.149757	7753, 10865, 3281, 5195	30	315	6781	2.87026	1	0.99208	90.3749
GOTERM_BP_FAT	GO:0009890~negative regulation of biosynthetic process	4	10.2564	0.157944	7753, 10865, 3281, 5195	30	323	6781	2.79917	1	0.989819	91.629
GOTERM_BP_FAT	GO:0006355~regulation of transcription, DNA-dependent	6	15.3846	0.206118	7753, 2308, 10865, 3281, 5195, 10362	30	743	6781	1.8253	1	0.99383	96.4222
GOTERM_MF_FAT	GO:0016564~transcription repressor activity	3	7.69231	0.226355	10865, 3281, 5195	33	181	6445	3.23707	1	0.981276	94.8366
GOTERM_BP_FAT	GO:0051252~regulation of RNA metabolic process	6	15.3846	0.230806	7753, 2308, 10865, 3281, 5195, 10362	30	774	6781	1.7522	1	0.996087	97.7319
GOTERM_BP_FAT	GO:0010605~negative regulation of macromolecule metabolic process	4	10.2564	0.294816	7753, 10865, 3281, 5195	30	444	6781	2.03634	1	0.998583	99.3525
UP_SEQ_FEATURE	mutagenesis site	7	17.9487	0.455577	115557, 2308, 5742, 3281, 5195, 10362, 25996	38	1277	8782	1.26683	1	1	99.9519
GOTERM_BP_FAT	GO:0006357~regulation of transcription from RNA polymerase II promoter	3	7.69231	0.530769	7753, 2308, 3281	30	410	6781	1.6539	1	0.999715	99.9982
Annotation Cluster 11	Enrichment Score: 0.8171368504780279
Category	Term	Count	%	PValue	Genes	List Total	Pop Hits	Pop Total	Fold Enrichment	Bonferroni	Benjamini	FDR
UCSC_TFBS	FAC1	25	64.1026	0.0113513	2006, 7753, 22998, 55784, 2317, 10362, 57698, 81669, 10631, 63893, 11345, 7049, 140606, 81887, 10659, 1282, 2308, 5742, 6711, 7317, 5195, 199964, 115557, 4628, 11080	38	3870	8618	1.46505	0.865912	0.284573	13.0721
UCSC_TFBS	P53	28	71.7949	0.140176	2006, 22998, 55784, 3281, 2317, 57698, 8076, 81669, 10631, 2199, 63893, 11345, 7049, 140606, 81887, 10659, 134218, 1282, 2308, 5742, 6711, 7317, 5195, 25996, 115557, 7533, 4628, 11080	38	5438	8618	1.16773	1	0.3727	84.328
UCSC_TFBS	TATA	21	53.8462	0.327429	2006, 1282, 2308, 22998, 6711, 55784, 5742, 2317, 5195, 7317, 6423, 57698, 115557, 81669, 10631, 4628, 7049, 11080, 81887, 10659, 134218	38	4226	8618	1.12697	1	0.543599	99.2306
UCSC_TFBS	GATA	18	46.1538	0.343126	2006, 1282, 2308, 22998, 6711, 55784, 5742, 5195, 7317, 57698, 115557, 81669, 4628, 7049, 11080, 81887, 134218, 10659	38	3567	8618	1.14444	1	0.540949	99.4242
UCSC_TFBS	PBX1	21	53.8462	0.459224	2006, 1282, 2308, 22998, 6711, 55784, 5195, 7317, 2317, 57698, 8076, 115557, 81669, 84886, 10631, 63893, 4628, 140606, 7049, 81887, 10659	38	4468	8618	1.06593	1	0.594094	99.9471
Annotation Cluster 12	Enrichment Score: 0.7926605532975551
Category	Term	Count	%	PValue	Genes	List Total	Pop Hits	Pop Total	Fold Enrichment	Bonferroni	Benjamini	FDR
GOTERM_MF_FAT	GO:0003779~actin binding	5	12.8205	0.0201968	22998, 6711, 4628, 7533, 2317	33	213	6445	4.58458	0.920344	0.717766	20.991
GOTERM_MF_FAT	GO:0008092~cytoskeletal protein binding	6	15.3846	0.0260924	22998, 6711, 11345, 4628, 7533, 2317	33	345	6445	3.39657	0.962312	0.664725	26.3098
GOTERM_CC_FAT	GO:0005938~cell cortex	3	7.69231	0.0543737	6711, 4628, 2317	27	93	6387	7.63082	0.996471	0.506305	46.2971
SP_PIR_KEYWORDS	actin-binding	3	7.69231	0.146825	6711, 4628, 2317	38	161	8789	4.30974	1	0.893852	83.519
GOTERM_CC_FAT	GO:0015629~actin cytoskeleton	3	7.69231	0.17001	6711, 4628, 2317	27	183	6387	3.87796	1	0.847722	87.4084
GOTERM_CC_FAT	GO:0005856~cytoskeleton	3	7.69231	0.818767	6711, 4628, 2317	27	736	6387	0.964221	1	0.99789	100
GOTERM_CC_FAT	GO:0043228~non-membrane-bounded organelle	5	12.8205	0.882161	6711, 4628, 2317, 81887, 134218	27	1473	6387	0.802972	1	0.999417	100
GOTERM_CC_FAT	GO:0043232~intracellular non-membrane-bounded organelle	5	12.8205	0.882161	6711, 4628, 2317, 81887, 134218	27	1473	6387	0.802972	1	0.999417	100
Annotation Cluster 13	Enrichment Score: 0.7910297312799086
Category	Term	Count	%	PValue	Genes	List Total	Pop Hits	Pop Total	Fold Enrichment	Bonferroni	Benjamini	FDR
UCSC_TFBS	NFE2	19	48.7179	0.0429277	1282, 22998, 6711, 10865, 5742, 55784, 5195, 7317, 2317, 25996, 57698, 115557, 84886, 63893, 11345, 4628, 7049, 81887, 10659	38	2909	8618	1.48127	0.999557	0.382848	41.6329
UCSC_TFBS	GRE	21	53.8462	0.208682	1282, 2308, 942, 6711, 10865, 55784, 5742, 2317, 5195, 7317, 25996, 57698, 115557, 10631, 2199, 63893, 11345, 7533, 7049, 81887, 10659	38	3971	8618	1.19934	1	0.431241	94.3423
UCSC_TFBS	NKX61	16	41.0256	0.472811	1282, 2308, 942, 22998, 6711, 10865, 55784, 5195, 2317, 57698, 10631, 63893, 11345, 7049, 81887, 10659	38	3339	8618	1.08674	1	0.602898	99.9613
Annotation Cluster 14	Enrichment Score: 0.7788818268687936
Category	Term	Count	%	PValue	Genes	List Total	Pop Hits	Pop Total	Fold Enrichment	Bonferroni	Benjamini	FDR
UCSC_TFBS	NFE2	19	48.7179	0.0429277	1282, 22998, 6711, 10865, 5742, 55784, 5195, 7317, 2317, 25996, 57698, 115557, 84886, 63893, 11345, 4628, 7049, 81887, 10659	38	2909	8618	1.48127	0.999557	0.382848	41.6329
UCSC_TFBS	IK3	19	48.7179	0.276682	2006, 1282, 942, 22998, 6711, 10865, 55784, 3281, 5195, 7317, 2317, 7508, 57698, 115557, 63893, 4628, 7049, 81887, 10659	38	3665	8618	1.17572	1	0.50963	98.1216
UCSC_TFBS	BACH1	20	51.2821	0.387825	2006, 1282, 22998, 6711, 10865, 5742, 3281, 5195, 7317, 7508, 25996, 57698, 199964, 84886, 63893, 4628, 7533, 7049, 81887, 10659	38	4109	8618	1.10387	1	0.560698	99.7575
Annotation Cluster 15	Enrichment Score: 0.7341837510317427
Category	Term	Count	%	PValue	Genes	List Total	Pop Hits	Pop Total	Fold Enrichment	Bonferroni	Benjamini	FDR
UCSC_TFBS	MRF2	23	58.9744	0.0987644	10894, 6450, 1282, 7753, 2308, 942, 22998, 6711, 10865, 5742, 2317, 5195, 7317, 7508, 57698, 8076, 81669, 11345, 4628, 7533, 7049, 81887, 10659	38	4098	8618	1.27285	1	0.374549	72.0868
UCSC_TFBS	IK1	17	43.5897	0.13199	2006, 1282, 942, 22998, 6711, 10865, 5742, 5195, 2317, 7508, 57698, 8076, 4628, 7533, 140606, 7049, 10659	38	2864	8618	1.34617	1	0.375035	82.3955
UCSC_TFBS	HFH3	15	38.4615	0.48118	1282, 2308, 942, 22998, 6711, 5742, 55784, 5195, 2317, 7508, 57698, 81669, 4628, 7049, 10659	38	3123	8618	1.08929	1	0.60599	99.9682
Annotation Cluster 16	Enrichment Score: 0.7330231037546913
Category	Term	Count	%	PValue	Genes	List Total	Pop Hits	Pop Total	Fold Enrichment	Bonferroni	Benjamini	FDR
SP_PIR_KEYWORDS	polymorphism	27	69.2308	0.0944859	10894, 2006, 942, 7753, 22998, 55784, 2317, 6423, 8076, 84886, 10631, 2199, 63893, 11345, 7049, 81887, 10659, 134218, 6450, 1282, 5742, 6711, 7317, 5195, 7508, 199964, 115557	38	5130	8789	1.21731	0.999987	0.893871	67.5977
UP_SEQ_FEATURE	sequence variant	27	69.2308	0.173985	10894, 2006, 942, 7753, 22998, 55784, 2317, 6423, 8076, 84886, 10631, 2199, 63893, 11345, 7049, 81887, 10659, 134218, 6450, 1282, 5742, 6711, 7317, 5195, 7508, 199964, 115557	38	5393	8782	1.15703	1	0.999574	90.9428
UCSC_TFBS	PPARG	31	79.4872	0.384639	10894, 2006, 942, 7753, 22998, 55784, 2317, 6423, 57698, 8076, 84886, 10631, 63893, 11345, 140606, 7049, 81887, 10659, 134218, 6450, 1282, 2308, 5742, 10865, 6711, 7317, 5195, 7508, 115557, 199964, 4628	38	6678	8618	1.05278	1	0.563807	99.7416
Annotation Cluster 17	Enrichment Score: 0.703117886138317
Category	Term	Count	%	PValue	Genes	List Total	Pop Hits	Pop Total	Fold Enrichment	Bonferroni	Benjamini	FDR
UCSC_TFBS	AP1FJ	17	43.5897	0.0326407	2006, 2308, 942, 22998, 6711, 10865, 5742, 5195, 7317, 7508, 115557, 81669, 2199, 63893, 11345, 7049, 10659	38	2408	8618	1.60109	0.997093	0.38536	33.4506
UCSC_TFBS	CMYB	17	43.5897	0.474358	6450, 2006, 22998, 6711, 10865, 5195, 7317, 7508, 25996, 115557, 81669, 2199, 63893, 4628, 140606, 7049, 10659	38	3572	8618	1.07935	1	0.601584	99.9626
UCSC_TFBS	ATF6	18	46.1538	0.502089	2006, 22998, 6711, 10865, 5195, 7317, 2317, 6423, 7508, 57698, 115557, 81669, 2199, 63893, 11345, 4628, 140606, 10659	38	3851	8618	1.06004	1	0.61666	99.9808
Annotation Cluster 18	Enrichment Score: 0.6978891463478782
Category	Term	Count	%	PValue	Genes	List Total	Pop Hits	Pop Total	Fold Enrichment	Bonferroni	Benjamini	FDR
UCSC_TFBS	ISRE	23	58.9744	0.015836	10894, 2006, 1282, 7753, 2308, 942, 22998, 10865, 55784, 5195, 7317, 2317, 7508, 25996, 57698, 81669, 84886, 63893, 4628, 140606, 7049, 10659, 134218	38	3502	8618	1.48948	0.939761	0.330583	17.7891
UCSC_TFBS	STAT1	21	53.8462	0.0386431	10894, 2006, 1282, 7753, 22998, 6711, 10865, 55784, 5195, 2317, 6423, 115557, 81669, 63893, 11345, 4628, 7049, 11080, 81887, 134218, 10659	38	3314	8618	1.43711	0.999028	0.370233	38.3443
UCSC_TFBS	LMO2COM	26	66.6667	0.0944073	10894, 2006, 7753, 942, 22998, 55784, 2317, 3281, 6423, 57698, 81669, 10631, 63893, 7049, 140606, 81887, 10659, 134218, 1282, 2308, 6711, 7317, 5195, 7508, 115557, 4628	38	4788	8618	1.23152	1	0.4015	70.3849
UCSC_TFBS	NKX25	24	61.5385	0.390232	10894, 2006, 1282, 7753, 2308, 22998, 6711, 55784, 5195, 7317, 2317, 7508, 25996, 57698, 115557, 81669, 10631, 63893, 11345, 4628, 7049, 11080, 10659, 134218	38	5040	8618	1.07995	1	0.560163	99.769
UCSC_TFBS	RORA1	17	43.5897	0.445043	1282, 22998, 6711, 55784, 5195, 7317, 2317, 7508, 25996, 57698, 8076, 115557, 10631, 63893, 7049, 10659, 134218	38	3521	8618	1.09498	1	0.593925	99.9273
UCSC_TFBS	SRF	26	66.6667	0.581134	10894, 7753, 22998, 55784, 2317, 6423, 57698, 81669, 10631, 63893, 7049, 140606, 81887, 10659, 134218, 6450, 1282, 2308, 10865, 6711, 7317, 5195, 7508, 115557, 4628, 11080	38	5829	8618	1.01158	1	0.662507	99.9977
UCSC_TFBS	SREBP1	22	56.4103	0.615585	2006, 1282, 7753, 2308, 22998, 6711, 10865, 55784, 5195, 7317, 2317, 7508, 25996, 57698, 8076, 115557, 10631, 63893, 4628, 140606, 7049, 10659	38	4975	8618	1.00289	1	0.689162	99.9992
UCSC_TFBS	FOXO4	18	46.1538	0.72757	1282, 2308, 22998, 6711, 10865, 55784, 5195, 2317, 6423, 57698, 115557, 81669, 10631, 63893, 4628, 7049, 10659, 134218	38	4272	8618	0.955574	1	0.771576	100
Annotation Cluster 19	Enrichment Score: 0.6316125882945427
Category	Term	Count	%	PValue	Genes	List Total	Pop Hits	Pop Total	Fold Enrichment	Bonferroni	Benjamini	FDR
UCSC_TFBS	OLF1	22	56.4103	0.071257	2006, 1282, 2308, 22998, 6711, 10865, 5195, 7317, 2317, 10362, 6423, 25996, 115557, 81669, 84886, 2199, 63893, 11345, 4628, 140606, 7049, 10659	38	3744	8618	1.33263	0.999998	0.405729	59.6319
UCSC_TFBS	SPZ1	16	41.0256	0.153897	2006, 1282, 7753, 2308, 6711, 10865, 5195, 7317, 2317, 57698, 115557, 2199, 63893, 4628, 140606, 81887	38	2708	8618	1.33997	1	0.377734	87.1355
UCSC_TFBS	SP1	12	30.7692	0.314971	115557, 81669, 2006, 1282, 2308, 2199, 10865, 6711, 11345, 4628, 140606, 5195	38	2165	8618	1.25703	1	0.534799	99.0363
UCSC_TFBS	PAX5	19	48.7179	0.861433	2006, 1282, 2308, 22998, 6711, 10865, 5195, 7317, 10362, 6423, 25996, 115557, 81669, 2199, 63893, 11345, 4628, 140606, 81887	38	4839	8618	0.890473	1	0.876987	100
Annotation Cluster 20	Enrichment Score: 0.608973927269667
Category	Term	Count	%	PValue	Genes	List Total	Pop Hits	Pop Total	Fold Enrichment	Bonferroni	Benjamini	FDR
GOTERM_MF_FAT	GO:0008092~cytoskeletal protein binding	6	15.3846	0.0260924	22998, 6711, 11345, 4628, 7533, 2317	33	345	6445	3.39657	0.962312	0.664725	26.3098
GOTERM_BP_FAT	GO:0046907~intracellular transport	5	12.8205	0.156765	6711, 11345, 4628, 7533, 5195	30	494	6781	2.28779	1	0.991792	91.4583
GOTERM_BP_FAT	GO:0008104~protein localization	5	12.8205	0.247906	6711, 11345, 7533, 5195, 2317	30	596	6781	1.89625	1	0.996134	98.3602
GOTERM_BP_FAT	GO:0006886~intracellular protein transport	3	7.69231	0.341227	6711, 7533, 5195	30	282	6781	2.40461	1	0.999136	99.7576
GOTERM_BP_FAT	GO:0034613~cellular protein localization	3	7.69231	0.382052	6711, 7533, 5195	30	308	6781	2.20162	1	0.998863	99.9037
GOTERM_BP_FAT	GO:0070727~cellular macromolecule localization	3	7.69231	0.385156	6711, 7533, 5195	30	310	6781	2.18742	1	0.998725	99.9104
GOTERM_BP_FAT	GO:0015031~protein transport	4	10.2564	0.389661	6711, 11345, 7533, 5195	30	523	6781	1.72874	1	0.998623	99.9194
GOTERM_BP_FAT	GO:0045184~establishment of protein localization	4	10.2564	0.395634	6711, 11345, 7533, 5195	30	528	6781	1.71237	1	0.998565	99.9301
SP_PIR_KEYWORDS	acetylation	10	25.641	0.421117	81669, 84886, 6711, 11345, 4628, 7317, 7533, 5195, 2317, 10659	38	1922	8789	1.20338	1	0.983725	99.7984
Annotation Cluster 21	Enrichment Score: 0.5730571853717337
Category	Term	Count	%	PValue	Genes	List Total	Pop Hits	Pop Total	Fold Enrichment	Bonferroni	Benjamini	FDR
UCSC_TFBS	HFH1	20	51.2821	0.119845	10894, 7753, 2308, 22998, 6711, 55784, 5195, 6423, 57698, 8076, 81669, 10631, 2199, 63893, 4628, 140606, 7049, 11080, 81887, 10659	38	3491	8618	1.29928	1	0.356313	79.1228
UCSC_TFBS	FOXO1	18	46.1538	0.190438	10894, 2308, 942, 22998, 6711, 55784, 5742, 5195, 2317, 57698, 8076, 10631, 63893, 4628, 140606, 7049, 11080, 10659	38	3245	8618	1.258	1	0.421198	92.5163
UCSC_TFBS	MEIS1AHOXA9	15	38.4615	0.279227	10894, 2006, 2308, 7753, 22998, 6711, 55784, 5195, 57698, 8076, 10631, 4628, 7049, 134218, 10659	38	2767	8618	1.22943	1	0.50907	98.2011
UCSC_TFBS	CDP	19	48.7179	0.800648	10894, 2006, 2308, 942, 22998, 6711, 55784, 5195, 57698, 8076, 115557, 81669, 10631, 4628, 140606, 7049, 11080, 81887, 10659	38	4670	8618	0.922698	1	0.828459	100
Annotation Cluster 22	Enrichment Score: 0.5707651740792433
Category	Term	Count	%	PValue	Genes	List Total	Pop Hits	Pop Total	Fold Enrichment	Bonferroni	Benjamini	FDR
UCSC_TFBS	SRY	23	58.9744	0.00603292	1282, 7753, 2308, 942, 22998, 6711, 10865, 55784, 2317, 5195, 10362, 57698, 8076, 115557, 81669, 10631, 11345, 4628, 140606, 7049, 81887, 10659, 134218	38	3258	8618	1.60103	0.655276	0.298829	7.15657
UCSC_TFBS	TBP	18	46.1538	0.0281935	1282, 7753, 2308, 22998, 6711, 55784, 5195, 2317, 6423, 57698, 8076, 115557, 63893, 4628, 7533, 7049, 11080, 10659	38	2576	8618	1.58471	0.993483	0.395488	29.5974
UCSC_TFBS	RORA2	22	56.4103	0.080742	1282, 7753, 2308, 22998, 6711, 55784, 5742, 3281, 5195, 7317, 2317, 57698, 115557, 81669, 84886, 10631, 63893, 11345, 4628, 7049, 81887, 10659	38	3790	8618	1.31646	1	0.422348	64.4097
UCSC_TFBS	CDC5	20	51.2821	0.0853468	1282, 2308, 22998, 6711, 10865, 55784, 3281, 5195, 7317, 2317, 25996, 57698, 8076, 115557, 10631, 4628, 7049, 11080, 10659, 134218	38	3359	8618	1.35034	1	0.407478	66.5367
UCSC_TFBS	OCT	21	53.8462	0.0865843	1282, 7753, 2308, 942, 22998, 6711, 55784, 2317, 5195, 7317, 6423, 7508, 57698, 8076, 115557, 199964, 81669, 63893, 4628, 7049, 10659	38	3589	8618	1.32699	1	0.392318	67.0881
UCSC_TFBS	NFAT	19	48.7179	0.115165	10894, 1282, 2308, 22998, 6711, 55784, 5742, 5195, 2317, 25996, 57698, 115557, 84886, 63893, 4628, 7049, 11080, 134218, 10659	38	3251	8618	1.32544	1	0.387015	77.7189
UCSC_TFBS	IRF1	13	33.3333	0.118423	2308, 6711, 10865, 55784, 5195, 7317, 2317, 57698, 115557, 10631, 7049, 4628, 10659	38	1970	8618	1.49658	1	0.370078	78.7052
UCSC_TFBS	IRF7	20	51.2821	0.134451	1282, 7753, 2308, 942, 22998, 55784, 3281, 5195, 2317, 10362, 6423, 7508, 57698, 115557, 2199, 63893, 4628, 7049, 134218, 10659	38	3539	8618	1.28166	1	0.370012	82.9985
UCSC_TFBS	HOXA3	19	48.7179	0.135657	10894, 6450, 2006, 1282, 22998, 6711, 55784, 5742, 5195, 7317, 2317, 115557, 81669, 10631, 11345, 4628, 7049, 81887, 10659	38	3318	8618	1.29867	1	0.36757	83.2869
UCSC_TFBS	LHX3	16	41.0256	0.143005	6450, 2006, 1282, 2308, 22998, 6711, 55784, 5195, 2317, 57698, 10631, 4628, 7049, 11080, 134218, 10659	38	2678	8618	1.35498	1	0.368939	84.9491
UCSC_TFBS	STAT5B	15	38.4615	0.160512	1282, 2308, 22998, 10865, 3281, 2317, 10362, 57698, 115557, 10631, 63893, 4628, 7049, 11080, 10659	38	2508	8618	1.3564	1	0.38663	88.3168
UCSC_TFBS	CEBPA	13	33.3333	0.206983	2006, 1282, 942, 22998, 55784, 5195, 2317, 6423, 8076, 10631, 7049, 134218, 10659	38	2183	8618	1.35056	1	0.432715	94.1915
UCSC_TFBS	CDPCR1	17	43.5897	0.224999	1282, 2308, 22998, 6711, 55784, 5195, 7317, 2317, 10362, 57698, 25996, 115557, 84886, 2199, 4628, 134218, 10659	38	3102	8618	1.24288	1	0.450168	95.6187
UCSC_TFBS	FOXD3	14	35.8974	0.298434	6450, 2006, 1282, 2308, 22998, 6711, 5195, 2317, 10631, 4628, 7049, 140606, 134218, 10659	38	2580	8618	1.23064	1	0.524142	98.7086
UCSC_TFBS	TATA	21	53.8462	0.327429	2006, 1282, 2308, 22998, 6711, 55784, 5742, 2317, 5195, 7317, 6423, 57698, 115557, 81669, 10631, 4628, 7049, 11080, 81887, 10659, 134218	38	4226	8618	1.12697	1	0.543599	99.2306
UCSC_TFBS	IRF2	17	43.5897	0.3287	1282, 7753, 2308, 22998, 6711, 55784, 5195, 2317, 57698, 8076, 115557, 81669, 11345, 140606, 7049, 134218, 10659	38	3312	8618	1.16408	1	0.541303	99.2483
UCSC_TFBS	NKX3A	18	46.1538	0.331459	2006, 7753, 2308, 22998, 6711, 55784, 5742, 5195, 2317, 7508, 57698, 10631, 11345, 4628, 140606, 7049, 134218, 10659	38	3545	8618	1.15154	1	0.541028	99.2853
UCSC_TFBS	CART1	18	46.1538	0.339399	2006, 1282, 2308, 942, 22998, 6711, 55784, 5195, 7317, 2317, 57698, 8076, 84886, 4628, 7049, 81887, 10659, 134218	38	3560	8618	1.14669	1	0.543711	99.3828
UCSC_TFBS	GATA	18	46.1538	0.343126	2006, 1282, 2308, 22998, 6711, 55784, 5742, 5195, 7317, 57698, 115557, 81669, 4628, 7049, 11080, 81887, 134218, 10659	38	3567	8618	1.14444	1	0.540949	99.4242
UCSC_TFBS	E4BP4	17	43.5897	0.362245	1282, 2308, 22998, 6711, 55784, 5195, 2317, 6423, 57698, 8076, 81669, 10631, 63893, 11345, 7533, 7049, 10659	38	3374	8618	1.14269	1	0.554165	99.5993
UCSC_TFBS	FOXO3	11	28.2051	0.384246	115557, 1282, 2308, 22998, 6711, 4628, 7049, 5195, 2317, 57698, 10659	38	2054	8618	1.21455	1	0.566864	99.7395
UCSC_TFBS	ELK1	21	53.8462	0.392861	6450, 1282, 7753, 2308, 22998, 10865, 55784, 5195, 2317, 6423, 57698, 8076, 115557, 81669, 2199, 11345, 4628, 140606, 7049, 134218, 10659	38	4349	8618	1.0951	1	0.556555	99.7809
UCSC_TFBS	MEIS1BHOXA9	19	48.7179	0.422338	1282, 2308, 942, 22998, 6711, 55784, 5195, 7317, 2317, 57698, 84886, 11345, 4628, 140606, 7049, 11080, 81887, 134218, 10659	38	3941	8618	1.09338	1	0.577829	99.881
UCSC_TFBS	HNF3B	15	38.4615	0.455775	1282, 2308, 942, 22998, 6711, 10865, 55784, 5195, 2317, 84886, 10631, 4628, 7049, 134218, 10659	38	3080	8618	1.10449	1	0.596441	99.9428
UCSC_TFBS	NKX61	16	41.0256	0.472811	1282, 2308, 942, 22998, 6711, 10865, 55784, 5195, 2317, 57698, 10631, 63893, 11345, 7049, 81887, 10659	38	3339	8618	1.08674	1	0.602898	99.9613
UCSC_TFBS	HFH3	15	38.4615	0.48118	1282, 2308, 942, 22998, 6711, 5742, 55784, 5195, 2317, 7508, 57698, 81669, 4628, 7049, 10659	38	3123	8618	1.08929	1	0.60599	99.9682
UCSC_TFBS	HLF	15	38.4615	0.492404	1282, 2308, 22998, 6711, 55784, 5195, 2317, 7508, 57698, 10631, 4628, 7049, 11080, 81887, 10659	38	3142	8618	1.0827	1	0.612153	99.9757
UCSC_TFBS	S8	16	41.0256	0.495523	1282, 2308, 22998, 6711, 5742, 55784, 5195, 2317, 6423, 57698, 25996, 115557, 11345, 4628, 7049, 10659	38	3378	8618	1.0742	1	0.612573	99.9774
UCSC_TFBS	CHX10	15	38.4615	0.504203	1282, 2308, 22998, 6711, 5742, 55784, 5195, 2317, 57698, 115557, 7049, 11080, 81887, 134218, 10659	38	3162	8618	1.07585	1	0.616036	99.9818
UCSC_TFBS	NFKAPPAB65	9	23.0769	0.5203	1282, 942, 2308, 22998, 7049, 2317, 7508, 57698, 10659	38	1799	8618	1.13458	1	0.627283	99.9878
UCSC_TFBS	FREAC7	17	43.5897	0.542718	10894, 6450, 2308, 22998, 6711, 55784, 5195, 2317, 6423, 57698, 8076, 115557, 10631, 11345, 4628, 7049, 10659	38	3691	8618	1.04455	1	0.636723	99.9932
UCSC_TFBS	SEF1	19	48.7179	0.572271	6450, 1282, 7753, 2308, 22998, 6711, 55784, 5742, 5195, 7317, 2317, 57698, 115557, 2199, 11345, 4628, 7049, 81887, 10659	38	4206	8618	1.02449	1	0.658815	99.997
UCSC_TFBS	HSF1	11	28.2051	0.594707	115557, 1282, 10631, 22998, 55784, 10865, 7049, 3281, 2317, 6423, 10659	38	2381	8618	1.04775	1	0.670956	99.9985
UCSC_TFBS	NKX22	15	38.4615	0.675215	1282, 2308, 7753, 22998, 6711, 55784, 3281, 5195, 6423, 57698, 10631, 63893, 4628, 7049, 10659	38	3466	8618	0.981489	1	0.732737	99.9999
UCSC_TFBS	FOXO4	18	46.1538	0.72757	1282, 2308, 22998, 6711, 10865, 55784, 5195, 2317, 6423, 57698, 115557, 81669, 10631, 63893, 4628, 7049, 10659, 134218	38	4272	8618	0.955574	1	0.771576	100
UCSC_TFBS	FREAC4	15	38.4615	0.732352	1282, 2308, 22998, 6711, 10865, 55784, 5195, 2317, 10362, 7508, 57698, 115557, 4628, 7049, 10659	38	3581	8618	0.94997	1	0.773966	100
UCSC_TFBS	CETS1P54	9	23.0769	0.753217	115557, 81669, 1282, 2308, 22998, 4628, 7317, 5195, 57698	38	2178	8618	0.937147	1	0.791659	100
UCSC_TFBS	TST1	14	35.8974	0.797049	1282, 7753, 2308, 942, 22998, 55784, 5195, 7508, 57698, 115557, 63893, 7049, 7533, 10659	38	3491	8618	0.909497	1	0.828865	100
Annotation Cluster 23	Enrichment Score: 0.5060572913573828
Category	Term	Count	%	PValue	Genes	List Total	Pop Hits	Pop Total	Fold Enrichment	Bonferroni	Benjamini	FDR
GOTERM_BP_FAT	GO:0045449~regulation of transcription	10	25.641	0.0526311	81669, 7753, 942, 2308, 10865, 7049, 3281, 7533, 5195, 10362	30	1182	6781	1.9123	1	0.967499	54.1642
GOTERM_MF_FAT	GO:0030528~transcription regulator activity	8	20.5128	0.0687258	7753, 942, 2308, 10865, 3281, 7533, 5195, 10362	33	745	6445	2.09721	0.999854	0.82895	56.0534
GOTERM_BP_FAT	GO:0006355~regulation of transcription, DNA-dependent	6	15.3846	0.206118	7753, 2308, 10865, 3281, 5195, 10362	30	743	6781	1.8253	1	0.99383	96.4222
GOTERM_BP_FAT	GO:0051252~regulation of RNA metabolic process	6	15.3846	0.230806	7753, 2308, 10865, 3281, 5195, 10362	30	774	6781	1.7522	1	0.996087	97.7319
SP_PIR_KEYWORDS	dna-binding	5	12.8205	0.357898	7753, 2308, 10865, 10362, 7508	38	718	8789	1.61065	1	0.984573	99.3461
SP_PIR_KEYWORDS	transcription regulation	5	12.8205	0.505523	81669, 7753, 2308, 10865, 10362	38	870	8789	1.32925	1	0.993083	99.9663
SP_PIR_KEYWORDS	Transcription	5	12.8205	0.534219	81669, 7753, 2308, 10865, 10362	38	901	8789	1.28352	1	0.993772	99.9829
GOTERM_BP_FAT	GO:0006350~transcription	5	12.8205	0.57035	81669, 7753, 2308, 10865, 10362	30	923	6781	1.22445	1	0.999867	99.9995
SP_PIR_KEYWORDS	nucleus	10	25.641	0.620697	81669, 7753, 2308, 10865, 3281, 10362, 81887, 7508, 25996, 10659	38	2230	8789	1.03717	1	0.997725	99.9983
GOTERM_MF_FAT	GO:0003700~transcription factor activity	3	7.69231	0.629403	7753, 2308, 10362	33	422	6445	1.38841	1	0.999965	99.9989
GOTERM_MF_FAT	GO:0003677~DNA binding	5	12.8205	0.73194	7753, 2308, 10865, 10362, 7508	33	971	6445	1.00568	1	0.999996	100
Annotation Cluster 24	Enrichment Score: 0.46235809858023696
Category	Term	Count	%	PValue	Genes	List Total	Pop Hits	Pop Total	Fold Enrichment	Bonferroni	Benjamini	FDR
GOTERM_BP_FAT	GO:0009725~response to hormone stimulus	3	7.69231	0.310962	2308, 5742, 7049	30	263	6781	2.57833	1	0.998822	99.5365
GOTERM_BP_FAT	GO:0042127~regulation of cell proliferation	4	10.2564	0.350049	942, 2308, 5742, 7049	30	490	6781	1.84517	1	0.99913	99.8004
GOTERM_BP_FAT	GO:0009719~response to endogenous stimulus	3	7.69231	0.350718	2308, 5742, 7049	30	288	6781	2.35451	1	0.998933	99.8034
GOTERM_BP_FAT	GO:0010033~response to organic substance	4	10.2564	0.370487	2308, 5742, 7049, 11080	30	507	6781	1.7833	1	0.998774	99.8741
Annotation Cluster 25	Enrichment Score: 0.4595305461149026
Category	Term	Count	%	PValue	Genes	List Total	Pop Hits	Pop Total	Fold Enrichment	Bonferroni	Benjamini	FDR
UCSC_TFBS	PPARA	25	64.1026	0.0856397	7753, 22998, 55784, 2317, 10362, 57698, 10631, 2199, 63893, 11345, 7049, 10659, 134218, 1282, 2308, 5742, 10865, 6711, 7317, 5195, 7508, 25996, 199964, 115557, 4628	38	4511	8618	1.25687	1	0.398484	66.668
UCSC_TFBS	CEBPB	23	58.9744	0.219514	10894, 1282, 2308, 942, 22998, 6711, 10865, 55784, 5742, 2317, 5195, 7317, 10362, 7508, 57698, 115557, 63893, 4628, 7533, 7049, 81887, 10659, 134218	38	4460	8618	1.16954	1	0.44537	95.2227
UCSC_TFBS	TGIF	18	46.1538	0.255804	10894, 2006, 22998, 6711, 10865, 5742, 55784, 5195, 7317, 2317, 57698, 115557, 63893, 7533, 140606, 7049, 81887, 10659	38	3394	8618	1.20277	1	0.486578	97.3365
UCSC_TFBS	IK3	19	48.7179	0.276682	2006, 1282, 942, 22998, 6711, 10865, 55784, 3281, 5195, 7317, 2317, 7508, 57698, 115557, 63893, 4628, 7049, 81887, 10659	38	3665	8618	1.17572	1	0.50963	98.1216
UCSC_TFBS	ARP1	19	48.7179	0.417304	2006, 1282, 22998, 6711, 10865, 55784, 5742, 5195, 7317, 2317, 10362, 7508, 57698, 115557, 2199, 63893, 4628, 7049, 10659	38	3932	8618	1.09588	1	0.578588	99.8677
UCSC_TFBS	ROAZ	18	46.1538	0.456398	1282, 2308, 22998, 10865, 5742, 55784, 5195, 7317, 2317, 7508, 25996, 115557, 2199, 63893, 4628, 140606, 7049, 10659	38	3771	8618	1.08253	1	0.59404	99.9436
UCSC_TFBS	SREBP1	22	56.4103	0.615585	2006, 1282, 7753, 2308, 22998, 6711, 10865, 55784, 5195, 7317, 2317, 7508, 25996, 57698, 8076, 115557, 10631, 63893, 4628, 140606, 7049, 10659	38	4975	8618	1.00289	1	0.689162	99.9992
UCSC_TFBS	NCX	16	41.0256	0.640317	2006, 1282, 7753, 22998, 6711, 10865, 55784, 7317, 2317, 10362, 57698, 115557, 81669, 63893, 7049, 10659	38	3634	8618	0.998523	1	0.703582	99.9996
UCSC_TFBS	FREAC4	15	38.4615	0.732352	1282, 2308, 22998, 6711, 10865, 55784, 5195, 2317, 10362, 7508, 57698, 115557, 4628, 7049, 10659	38	3581	8618	0.94997	1	0.773966	100
Annotation Cluster 26	Enrichment Score: 0.4531443513082047
Category	Term	Count	%	PValue	Genes	List Total	Pop Hits	Pop Total	Fold Enrichment	Bonferroni	Benjamini	FDR
UCSC_TFBS	FREAC2	15	38.4615	0.14754	2308, 22998, 10865, 55784, 5195, 2317, 57698, 81669, 63893, 11345, 4628, 7049, 7533, 81887, 10659	38	2474	8618	1.37504	1	0.373899	85.8978
UCSC_TFBS	E4BP4	17	43.5897	0.362245	1282, 2308, 22998, 6711, 55784, 5195, 2317, 6423, 57698, 8076, 81669, 10631, 63893, 11345, 7533, 7049, 10659	38	3374	8618	1.14269	1	0.554165	99.5993
UCSC_TFBS	CREBP1	19	48.7179	0.369394	2006, 1282, 2308, 942, 22998, 6711, 10865, 5195, 2317, 57698, 8076, 81669, 63893, 11345, 4628, 7533, 7049, 11080, 10659	38	3845	8618	1.12068	1	0.555804	99.651
UCSC_TFBS	NKX61	16	41.0256	0.472811	1282, 2308, 942, 22998, 6711, 10865, 55784, 5195, 2317, 57698, 10631, 63893, 11345, 7049, 81887, 10659	38	3339	8618	1.08674	1	0.602898	99.9613
UCSC_TFBS	STAT5A	21	53.8462	0.581019	10894, 2006, 1282, 2308, 22998, 6711, 10865, 55784, 3281, 5195, 2317, 10362, 57698, 8076, 81669, 84886, 63893, 4628, 7533, 7049, 10659	38	4683	8618	1.01699	1	0.665001	99.9977
Annotation Cluster 27	Enrichment Score: 0.44101822125183954
Category	Term	Count	%	PValue	Genes	List Total	Pop Hits	Pop Total	Fold Enrichment	Bonferroni	Benjamini	FDR
GOTERM_CC_FAT	GO:0005624~membrane fraction	4	10.2564	0.297576	10894, 5742, 55784, 11345	27	469	6387	2.01753	1	0.960961	98.0314
GOTERM_CC_FAT	GO:0005626~insoluble fraction	4	10.2564	0.321632	10894, 5742, 55784, 11345	27	490	6387	1.93107	1	0.96185	98.6638
GOTERM_CC_FAT	GO:0000267~cell fraction	4	10.2564	0.496578	10894, 5742, 55784, 11345	27	645	6387	1.46701	1	0.992926	99.9515
Annotation Cluster 28	Enrichment Score: 0.4238551120871728
Category	Term	Count	%	PValue	Genes	List Total	Pop Hits	Pop Total	Fold Enrichment	Bonferroni	Benjamini	FDR
UCSC_TFBS	NRSF	23	58.9744	0.230596	6450, 2006, 1282, 2308, 22998, 6711, 10865, 55784, 5742, 2317, 5195, 7317, 10362, 6423, 7508, 57698, 8076, 115557, 63893, 11345, 4628, 140606, 10659	38	4486	8618	1.16276	1	0.455049	95.9916
UCSC_TFBS	ARP1	19	48.7179	0.417304	2006, 1282, 22998, 6711, 10865, 55784, 5742, 5195, 7317, 2317, 10362, 7508, 57698, 115557, 2199, 63893, 4628, 7049, 10659	38	3932	8618	1.09588	1	0.578588	99.8677
UCSC_TFBS	AHRARNT	20	51.2821	0.55607	6450, 2006, 1282, 2308, 10865, 5742, 5195, 7317, 2317, 10362, 6423, 7508, 57698, 115557, 2199, 63893, 4628, 140606, 7049, 11080	38	4408	8618	1.02899	1	0.645025	99.9953
Annotation Cluster 29	Enrichment Score: 0.41746073420740143
Category	Term	Count	%	PValue	Genes	List Total	Pop Hits	Pop Total	Fold Enrichment	Bonferroni	Benjamini	FDR
UCSC_TFBS	TAL1BETAE47	13	33.3333	0.280236	2308, 22998, 6711, 55784, 5195, 7317, 2317, 81669, 63893, 7049, 140606, 81887, 10659	38	2325	8618	1.26807	1	0.50628	98.2318
UCSC_TFBS	HTF	22	56.4103	0.306967	6450, 1282, 2308, 22998, 6711, 10865, 5742, 5195, 7317, 2317, 25996, 57698, 8076, 115557, 81669, 63893, 4628, 140606, 7049, 11080, 81887, 10659	38	4417	8618	1.12958	1	0.531977	98.8886
UCSC_TFBS	PBX1	21	53.8462	0.459224	2006, 1282, 2308, 22998, 6711, 55784, 5195, 7317, 2317, 57698, 8076, 115557, 81669, 84886, 10631, 63893, 4628, 140606, 7049, 81887, 10659	38	4468	8618	1.06593	1	0.594094	99.9471
UCSC_TFBS	CHOP	18	46.1538	0.541398	2308, 22998, 6711, 55784, 5195, 7317, 2317, 25996, 8076, 115557, 81669, 84886, 63893, 4628, 140606, 7049, 81887, 10659	38	3920	8618	1.04138	1	0.63808	99.993
Annotation Cluster 30	Enrichment Score: 0.40128333861296206
Category	Term	Count	%	PValue	Genes	List Total	Pop Hits	Pop Total	Fold Enrichment	Bonferroni	Benjamini	FDR
UCSC_TFBS	TGIF	18	46.1538	0.255804	10894, 2006, 22998, 6711, 10865, 5742, 55784, 5195, 7317, 2317, 57698, 115557, 63893, 7533, 140606, 7049, 81887, 10659	38	3394	8618	1.20277	1	0.486578	97.3365
UCSC_TFBS	NFKB	20	51.2821	0.386733	6450, 2006, 1282, 2308, 942, 22998, 6711, 10865, 55784, 5742, 5195, 2317, 57698, 115557, 2199, 63893, 7533, 7049, 81887, 10659	38	4107	8618	1.1044	1	0.562842	99.7521
UCSC_TFBS	NFKAPPAB	13	33.3333	0.632168	6450, 942, 22998, 6711, 10865, 5742, 55784, 7317, 115557, 7049, 7533, 81887, 10659	38	2916	8618	1.01106	1	0.698032	99.9995
Annotation Cluster 31	Enrichment Score: 0.32364492885432666
Category	Term	Count	%	PValue	Genes	List Total	Pop Hits	Pop Total	Fold Enrichment	Bonferroni	Benjamini	FDR
UCSC_TFBS	RSRFC4	18	46.1538	0.36088	10894, 1282, 2308, 942, 22998, 6711, 55784, 2317, 57698, 81669, 84886, 10631, 63893, 7533, 7049, 140606, 11080, 10659	38	3600	8618	1.13395	1	0.556143	99.5886
UCSC_TFBS	E4BP4	17	43.5897	0.362245	1282, 2308, 22998, 6711, 55784, 5195, 2317, 6423, 57698, 8076, 81669, 10631, 63893, 11345, 7533, 7049, 10659	38	3374	8618	1.14269	1	0.554165	99.5993
UCSC_TFBS	TCF11MAFG	17	43.5897	0.817901	10894, 1282, 2308, 22998, 6711, 55784, 5195, 7317, 2317, 6423, 57698, 81669, 63893, 140606, 7049, 81887, 10659	38	4252	8618	0.906731	1	0.841031	100
Annotation Cluster 32	Enrichment Score: 0.3156703030495955
Category	Term	Count	%	PValue	Genes	List Total	Pop Hits	Pop Total	Fold Enrichment	Bonferroni	Benjamini	FDR
GOTERM_MF_FAT	GO:0016563~transcription activator activity	3	7.69231	0.372291	942, 2308, 7533	33	260	6445	2.2535	1	0.99475	99.538
GOTERM_BP_FAT	GO:0045941~positive regulation of transcription	3	7.69231	0.420397	942, 2308, 7533	30	333	6781	2.03634	1	0.999005	99.9618
GOTERM_BP_FAT	GO:0010628~positive regulation of gene expression	3	7.69231	0.433937	942, 2308, 7533	30	342	6781	1.98275	1	0.999121	99.9728
GOTERM_BP_FAT	GO:0045935~positive regulation of nucleobase, nucleoside, nucleotide and nucleic acid metabolic process	3	7.69231	0.47216	942, 2308, 7533	30	368	6781	1.84266	1	0.999553	99.9901
GOTERM_BP_FAT	GO:0010557~positive regulation of macromolecule biosynthetic process	3	7.69231	0.492146	942, 2308, 7533	30	382	6781	1.77513	1	0.999661	99.9943
GOTERM_BP_FAT	GO:0051173~positive regulation of nitrogen compound metabolic process	3	7.69231	0.496372	942, 2308, 7533	30	385	6781	1.7613	1	0.999631	99.995
GOTERM_BP_FAT	GO:0031328~positive regulation of cellular biosynthetic process	3	7.69231	0.524008	942, 2308, 7533	30	405	6781	1.67432	1	0.999767	99.9978
GOTERM_BP_FAT	GO:0009891~positive regulation of biosynthetic process	3	7.69231	0.529421	942, 2308, 7533	30	409	6781	1.65795	1	0.999753	99.9981
GOTERM_BP_FAT	GO:0010604~positive regulation of macromolecule metabolic process	3	7.69231	0.663542	942, 2308, 7533	30	520	6781	1.30404	1	0.99998	100
Annotation Cluster 33	Enrichment Score: 0.304251186992266
Category	Term	Count	%	PValue	Genes	List Total	Pop Hits	Pop Total	Fold Enrichment	Bonferroni	Benjamini	FDR
SP_PIR_KEYWORDS	coiled coil	6	15.3846	0.394343	1282, 22998, 63893, 4628, 10362, 57698	38	977	8789	1.42041	1	0.987205	99.6632
UCSC_TFBS	CREBP1CJUN	6	15.3846	0.452084	1282, 2199, 22998, 63893, 4628, 2317	38	1023	8618	1.33014	1	0.595467	99.9378
UCSC_TFBS	GATA6	6	15.3846	0.68573	115557, 1282, 2308, 22998, 63893, 4628	38	1315	8618	1.03478	1	0.740538	99.9999
Annotation Cluster 34	Enrichment Score: 0.2937938833865971
Category	Term	Count	%	PValue	Genes	List Total	Pop Hits	Pop Total	Fold Enrichment	Bonferroni	Benjamini	FDR
GOTERM_BP_FAT	GO:0006928~cell motion	4	10.2564	0.11491	10894, 81669, 4628, 7049	30	279	6781	3.24062	1	0.991439	82.8167
SP_PIR_KEYWORDS	receptor	5	12.8205	0.141871	10894, 81669, 942, 11345, 7049	38	481	8789	2.40426	1	0.915404	82.3989
SP_PIR_KEYWORDS	glycoprotein	10	25.641	0.300775	10894, 81669, 1282, 942, 10631, 2199, 5742, 6711, 7049, 8076	38	1737	8789	1.33155	1	0.974661	98.2792
GOTERM_BP_FAT	GO:0006955~immune response	3	7.69231	0.35545	81669, 942, 7049	30	291	6781	2.33024	1	0.998569	99.8231
GOTERM_CC_FAT	GO:0044459~plasma membrane part	6	15.3846	0.451639	10894, 81669, 942, 6711, 7049, 5195	27	1076	6387	1.31908	1	0.990608	99.8746
GOTERM_CC_FAT	GO:0005886~plasma membrane	8	20.5128	0.513086	10894, 81669, 942, 5742, 6711, 4628, 7049, 5195	27	1635	6387	1.15746	1	0.992138	99.9665
GOTERM_CC_FAT	GO:0005887~integral to plasma membrane	3	7.69231	0.64376	10894, 81669, 7049	27	526	6387	1.34918	1	0.996947	99.999
GOTERM_CC_FAT	GO:0031226~intrinsic to plasma membrane	3	7.69231	0.654305	10894, 81669, 7049	27	536	6387	1.324	1	0.99647	99.9993
GOTERM_CC_FAT	GO:0016021~integral to membrane	9	23.0769	0.715027	199964, 10894, 115557, 81669, 942, 55784, 7049, 5195, 2317	27	2189	6387	0.97259	1	0.996859	99.9999
UP_SEQ_FEATURE	topological domain:Extracellular	4	10.2564	0.754362	10894, 81669, 942, 7049	38	912	8782	1.01362	1	1	100
GOTERM_CC_FAT	GO:0031224~intrinsic to membrane	9	23.0769	0.758079	199964, 10894, 115557, 81669, 942, 55784, 7049, 5195, 2317	27	2268	6387	0.938713	1	0.996764	100
SP_PIR_KEYWORDS	membrane	11	28.2051	0.781027	199964, 10894, 115557, 81669, 942, 5742, 55784, 6711, 7049, 5195, 11080	38	2783	8789	0.914188	1	0.999591	100
UP_SEQ_FEATURE	transmembrane region	7	17.9487	0.881554	199964, 10894, 115557, 81669, 942, 55784, 7049	38	2011	8782	0.804444	1	1	100
SP_PIR_KEYWORDS	transmembrane	7	17.9487	0.885405	199964, 10894, 115557, 81669, 942, 55784, 7049	38	2025	8789	0.799519	1	0.999963	100
UP_SEQ_FEATURE	topological domain:Cytoplasmic	4	10.2564	0.923983	10894, 81669, 942, 7049	38	1288	8782	0.717718	1	1	100
Annotation Cluster 35	Enrichment Score: 0.204669109304754
Category	Term	Count	%	PValue	Genes	List Total	Pop Hits	Pop Total	Fold Enrichment	Bonferroni	Benjamini	FDR
GOTERM_BP_FAT	GO:0007166~cell surface receptor linked signal transduction	5	12.8205	0.333793	81669, 2308, 6711, 7049, 6423	30	683	6781	1.65471	1	0.999175	99.7149
GOTERM_CC_FAT	GO:0031981~nuclear lumen	5	12.8205	0.551975	81669, 2308, 6711, 81887, 7508	27	947	6387	1.24897	1	0.991521	99.9867
GOTERM_CC_FAT	GO:0005654~nucleoplasm	3	7.69231	0.713613	81669, 2308, 7508	27	597	6387	1.18872	1	0.997555	99.9999
GOTERM_CC_FAT	GO:0070013~intracellular organelle lumen	5	12.8205	0.748283	81669, 2308, 6711, 81887, 7508	27	1201	6387	0.984827	1	0.996988	100
GOTERM_CC_FAT	GO:0043233~organelle lumen	5	12.8205	0.768097	81669, 2308, 6711, 81887, 7508	27	1233	6387	0.959268	1	0.996577	100
GOTERM_CC_FAT	GO:0031974~membrane-enclosed lumen	5	12.8205	0.782787	81669, 2308, 6711, 81887, 7508	27	1258	6387	0.940205	1	0.996693	100
Annotation Cluster 36	Enrichment Score: 0.026233275495464947
Category	Term	Count	%	PValue	Genes	List Total	Pop Hits	Pop Total	Fold Enrichment	Bonferroni	Benjamini	FDR
GOTERM_MF_FAT	GO:0043167~ion binding	8	20.5128	0.912367	115557, 7753, 2199, 22998, 5742, 55784, 25996, 134218	33	2010	6445	0.777325	1	1	100
GOTERM_MF_FAT	GO:0046914~transition metal ion binding	5	12.8205	0.913489	7753, 22998, 5742, 25996, 134218	33	1307	6445	0.747142	1	1	100
SP_PIR_KEYWORDS	zinc	3	7.69231	0.929585	7753, 22998, 134218	38	981	8789	0.707307	1	0.999985	100
SP_PIR_KEYWORDS	metal-binding	4	10.2564	0.951564	7753, 22998, 5742, 134218	38	1418	8789	0.652439	1	0.999995	100
GOTERM_MF_FAT	GO:0046872~metal ion binding	7	17.9487	0.954246	7753, 2199, 22998, 5742, 55784, 25996, 134218	33	1960	6445	0.697511	1	1	100
GOTERM_MF_FAT	GO:0043169~cation binding	7	17.9487	0.958468	7753, 2199, 22998, 5742, 55784, 25996, 134218	33	1985	6445	0.688726	1	1	100
GOTERM_MF_FAT	GO:0008270~zinc ion binding	3	7.69231	0.971694	7753, 22998, 134218	33	1018	6445	0.575549	1	1	100
Annotation Cluster 37	Enrichment Score: 0.026041290953219803
Category	Term	Count	%	PValue	Genes	List Total	Pop Hits	Pop Total	Fold Enrichment	Bonferroni	Benjamini	FDR
SP_PIR_KEYWORDS	atp-binding	3	7.69231	0.840933	63893, 4628, 7317	38	758	8789	0.915394	1	0.999881	100
SP_PIR_KEYWORDS	nucleotide-binding	3	7.69231	0.924038	63893, 4628, 7317	38	961	8789	0.722027	1	0.999986	100
GOTERM_MF_FAT	GO:0005524~ATP binding	3	7.69231	0.929982	63893, 4628, 7317	33	827	6445	0.708475	1	1	100
GOTERM_MF_FAT	GO:0032559~adenyl ribonucleotide binding	3	7.69231	0.932806	63893, 4628, 7317	33	836	6445	0.700848	1	1	100
GOTERM_MF_FAT	GO:0030554~adenyl nucleotide binding	3	7.69231	0.947435	63893, 4628, 7317	33	889	6445	0.659065	1	1	100
GOTERM_MF_FAT	GO:0001883~purine nucleoside binding	3	7.69231	0.95008	63893, 4628, 7317	33	900	6445	0.65101	1	1	100
GOTERM_MF_FAT	GO:0001882~nucleoside binding	3	7.69231	0.951241	63893, 4628, 7317	33	905	6445	0.647413	1	1	100
GOTERM_MF_FAT	GO:0000166~nucleotide binding	4	10.2564	0.967891	63893, 4628, 7317, 10659	33	1284	6445	0.608421	1	1	100
GOTERM_MF_FAT	GO:0032555~purine ribonucleotide binding	3	7.69231	0.972381	63893, 4628, 7317	33	1023	6445	0.572736	1	1	100
GOTERM_MF_FAT	GO:0032553~ribonucleotide binding	3	7.69231	0.972381	63893, 4628, 7317	33	1023	6445	0.572736	1	1	100
GOTERM_MF_FAT	GO:0017076~purine nucleotide binding	3	7.69231	0.978878	63893, 4628, 7317	33	1077	6445	0.54402	1	1	100

## Sheet: Sheet 4 IPA Func DEG > ASCvBMSC
Function analysis of Ingenuity Pathway Analysis for DEG more expressed in ASC compare to BMSC with overall tissue effect FDR=0.05 and post-hoc p-value<0.001
Category	B-H p-v	# Molecules	Molecules
Skeletal and Muscular System Development and Function	0.0228	7	ELN MYH10 FLNB FOXO1 TGFBR3 POSTN GEFT
Tissue Development	0.0228	11	ELN MYH10 FLNB COL4A1 SFRP2 FOXO1 TGFBR3 PTGS1 POSTN CD86 GEFT
Cell-mediated Immune Response	0.0523	3	COL4A1 PTGS1 CD86
Immune Cell Trafficking	0.0523	3	ELN COL4A1 CD86
Cell Cycle	0.0523	3	FOXO1 HMG20B XPC
Cellular Function and Maintenance	0.0523	3	MYH10 PTGS1 CD86
Digestive System Development and Function	0.0523	3	SPTBN1 TGFBR3 PTGS1
Hepatic System Development and Function	0.0523	3	SPTBN1 TGFBR3 PTGS1
Lipid Metabolism	0.0523	3	FOXO1 YWHAH PTGS1
Molecular Transport	0.0523	3	MYH10 PTGS1 LYVE1
Nervous System Development and Function	0.0523	3	MYH10 FOXO1 GEFT
Hematological System Development and Function	0.0523	4	ELN COL4A1 PTGS1 CD86
Cell Morphology	0.0523	4	MYH10 FOXO1 CD86 GEFT
Connective Tissue Development and Function	0.0523	4	ELN FOXO1 POSTN GEFT
Organ Development	0.0523	4	SPTBN1 ELN FOXO1 TGFBR3
Gene Expression	0.0523	5	HMG20B YWHAH FOXO1 TGFBR3 CD86
Small Molecule Biochemistry	0.0523	5	YWHAH PTGS1 CD86 LYVE1 REXO2
Cardiovascular System Development and Function	0.0523	6	FLNB ELN MYH10 FOXO1 TGFBR3 PTGS1
Embryonic Development	0.0523	6	MYH10 SFRP2 COL4A1 FOXO1 PTGS1 POSTN
Cellular Development	0.0523	7	COL4A1 FOXO1 TGFBR3 PTGS1 POSTN CD86 GEFT
Cellular Assembly and Organization	0.0523	8	SPTBN1 PEX14 MYH10 FLNB XPC POSTN CD86 GEFT
Organismal Development	0.0523	8	SPTBN1 ELN MYH10 COL4A1 SFRP2 FOXO1 TGFBR3 POSTN
Tissue Morphology	0.0523	9	ELN MYH10 COL4A1 FOXO1 XPC PTGS1 POSTN CD86 GEFT
Cellular Movement	0.0523	11	ELN MYH10 FLNB COL4A1 SFRP2 FOXO1 DNAJB4 TGFBR3 POSTN CD86 LYVE1
Cell Death	0.0622	4	MYH10 SFRP2 FOXO1 XPC
Cellular Growth and Proliferation	0.0739	3	SFRP2 TGFBR3 CD86
Organismal Survival	0.111	7	MYH10 FLNB COL4A1 FOXO1 TGFBR3 PTGS1 POSTN

## Sheet: Sheet 5 Effect funct DEG > ASC
Effect on function analysis of Ingenuity Pathway Analysis for DEG more expressed in ASC compare to BMSC with overall tissue effect FDR=0.05 and post-hoc p-value<0.001
Function Annotation	Molecules	# Molecules
affects developmental process of tissue (7/8)	ELN, FLNB, FOXO1, MYH10, POSTN, SFRP2, TGFBR3	7
increases developmental process of tissue (2/8)	FOXO1, GEFT	2
affects development of tissue (6/7)	ELN, FLNB, FOXO1, MYH10, POSTN, TGFBR3	6
increases development of tissue (2/7)	FOXO1, GEFT	2
affects development of muscle (5/6)	ELN, FLNB, FOXO1, MYH10, TGFBR3	5
increases development of muscle (2/6)	FOXO1, GEFT	2
affects myogenesis (3/5)	ELN, FLNB, MYH10	3
increases myogenesis (2/5)	FOXO1, GEFT	2
affects formation of tissue (3/4)	FOXO1, POSTN, PTGS1	3
decreases formation of tissue (1/4)	COL4A1	1
affects assembly of extracellular matrix (2/2)	ELN, POSTN	2
increases myogenesis of eukaryotic cells (2/2)	FOXO1, GEFT	2
affects assembly of elastic fibers (1/1)	ELN	1
affects assembly of myofibrils (1/1)	MYH10	1
affects closure of ductus arteriosus (1/1)	PTGS1	1
affects color of skeletal muscle (1/1)	FOXO1	1
increases delamination of muscle precursor cells (1/1)	FOXO1	1
affects delay in transmigration of smooth muscle cells (1/1)	ELN	1
affects development of diaphragm (1/1)	FOXO1	1
affects development of myocardium (1/1)	TGFBR3	1
affects development of skeletal system (1/1)	FLNB	1
affects development of trabecular bone (1/1)	POSTN	1
affects diameter of cardiomyocytes (1/1)	MYH10	1
affects formation of muscle (1/1)	FOXO1	1
affects generation of cytotoxic T cells (1/1)	CD86	1
affects generation of splenocytes (1/1)	CD86	1
decreases mass of skeletal muscle (1/1)	FOXO1	1
increases migration of muscle precursor cells (1/1)	FOXO1	1
increases myogenesis of stem cells (1/1)	FOXO1	1
affects pigmentation of hindlimb (1/1)	FOXO1	1
decreases quantity of slow-twitch muscle fibers (1/1)	FOXO1	1
increases regeneration of skeletal muscle (1/1)	GEFT	1
affects reorganization of smooth muscle (1/1)	ELN	1
affects segmentation of somites (1/1)	SFRP2	1
decreases size of fast-twitch muscle fibers (1/1)	FOXO1	1
decreases size of slow-twitch muscle fibers (1/1)	FOXO1	1
increases size of vertebral column (1/1)	GEFT	1
affects survival of smooth muscle cells (1/1)	FOXO1	1
decreases survival of smooth muscle cells (1/1)	FOXO1	1

## Sheet: Sheet 6 Funct chart DEG > BMSC
Category	Term	Count	%	PValue	Genes	List Total	Pop Hits	Pop Total	Fold Enrichment	Bonferroni	Benjamini	FDR
GOTERM_BP_FAT	GO:0044271~nitrogen compound biosynthetic process	4	18.1818	0.0124863	4522, 5092, 159, 79814	17	212	6781	7.52608	0.994563	0.994563	16.1546
GOTERM_CC_FAT	GO:0031982~vesicle	5	22.7273	0.013794	7422, 22862, 6696, 2335, 84937	15	450	6387	4.73111	0.577338	0.577338	13.0791
SP_PIR_KEYWORDS	purine biosynthesis	2	9.09091	0.0142548	4522, 159	22	6	8789	133.167	0.799717	0.799717	15.0198
GOTERM_BP_FAT	GO:0045124~regulation of bone resorption	2	9.09091	0.0164075	7422, 6696	17	7	6781	113.966	0.998957	0.967703	20.7043
GOTERM_BP_FAT	GO:0046850~regulation of bone remodeling	2	9.09091	0.0164075	7422, 6696	17	7	6781	113.966	0.998957	0.967703	20.7043
GOTERM_BP_FAT	GO:0022604~regulation of cell morphogenesis	3	13.6364	0.017	7422, 6696, 2335	17	86	6781	13.9145	0.999188	0.906696	21.3716
GOTERM_BP_FAT	GO:0034103~regulation of tissue remodeling	2	9.09091	0.0233617	7422, 6696	17	10	6781	79.7765	0.999945	0.913925	28.2142
GOTERM_CC_FAT	GO:0030141~secretory granule	3	13.6364	0.024984	7422, 22862, 2335	15	114	6387	11.2053	0.791682	0.543581	22.5339
UP_SEQ_FEATURE	domain:Fibronectin type-III 9	2	9.09091	0.0260062	22862, 2335	22	11	8782	72.5785	0.959834	0.959834	26.1688
UP_TISSUE	Liver	8	36.3636	0.0271597	223, 5757, 4522, 6696, 5092, 2335, 159, 3159	22	1282	8634	2.44901	0.837542	0.837542	24.5373
UP_SEQ_FEATURE	domain:Fibronectin type-III 8	2	9.09091	0.0329862	22862, 2335	22	14	8782	57.026	0.983297	0.870761	32.0364
UP_SEQ_FEATURE	domain:Fibronectin type-III 7	2	9.09091	0.0329862	22862, 2335	22	14	8782	57.026	0.983297	0.870761	32.0364
UP_SEQ_FEATURE	domain:Fibronectin type-III 6	2	9.09091	0.0399186	22862, 2335	22	17	8782	46.9626	0.993056	0.809222	37.4394
INTERPRO	IPR003962:Fibronectin, type III subdomain	2	9.09091	0.04089	22862, 2335	22	16	8066	45.8295	0.921662	0.921662	34.2868
UCSC_TFBS	ARP1	15	68.1818	0.0427605	25953, 223, 22862, 5757, 2335, 159, 3159, 79814, 7422, 4522, 2941, 79363, 26355, 55715, 84937	22	3932	8618	1.49438	0.999523	0.999523	41.4776
INTERPRO	IPR016160:Aldehyde dehydrogenase, conserved site	2	9.09091	0.0433921	223, 2335	22	17	8066	43.1337	0.933201	0.741544	35.9906
GOTERM_BP_FAT	GO:0003006~reproductive developmental process	3	13.6364	0.0453556	7422, 22862, 6696	17	146	6781	8.19621	1	0.978775	47.8416
GOTERM_CC_FAT	GO:0031988~membrane-bounded vesicle	4	18.1818	0.0475198	7422, 22862, 6696, 2335	15	383	6387	4.447	0.951127	0.634386	38.8178
UP_TISSUE	Pancreas	5	22.7273	0.0478592	5757, 2941, 1520, 3159, 55715	22	578	8634	3.39494	0.96071	0.801784	39.4335
SP_PIR_KEYWORDS	homotetramer	2	9.09091	0.0490499	223, 5092	22	21	8789	38.0476	0.996422	0.940182	43.4542
GOTERM_MF_FAT	GO:0050840~extracellular matrix binding	2	9.09091	0.0509365	7422, 6696	17	21	6445	36.1064	0.991412	0.991412	43.4445
SP_PIR_KEYWORDS	cytosol	2	9.09091	0.0513275	223, 5092	22	22	8789	36.3182	0.997265	0.860146	44.9705
UP_SEQ_FEATURE	domain:Fibronectin type-III 5	2	9.09091	0.0581742	22862, 2335	22	25	8782	31.9345	0.999333	0.839268	49.846
UP_SEQ_FEATURE	nucleotide phosphate-binding region:GTP	3	13.6364	0.0589787	22931, 79363, 159	22	166	8782	7.21413	0.999399	0.773104	50.337
GOTERM_CC_FAT	GO:0031410~cytoplasmic vesicle	4	18.1818	0.0622188	7422, 22862, 2335, 84937	15	427	6387	3.98876	0.981366	0.630535	47.7047
KEGG_PATHWAY	hsa04510:Focal adhesion	3	13.6364	0.066066	7422, 6696, 2335	10	138	2873	6.24565	0.914615	0.914615	45.6447
SP_PIR_KEYWORDS	acetylation	9	40.9091	0.0681446	223, 22931, 7422, 22862, 5757, 4522, 5092, 159, 3159	22	1922	8789	1.87071	0.999631	0.861402	55.0695
GOTERM_CC_FAT	GO:0031093~platelet alpha granule lumen	2	9.09091	0.0700236	7422, 2335	15	33	6387	25.8061	0.988902	0.593508	51.9344
SP_PIR_KEYWORDS	gtp-binding	3	13.6364	0.0712515	22931, 79363, 159	22	185	8789	6.47838	0.999746	0.809051	56.7386
GOTERM_CC_FAT	GO:0060205~cytoplasmic membrane-bounded vesicle lumen	2	9.09091	0.0741175	7422, 2335	15	35	6387	24.3314	0.991558	0.548757	54.0274
GOTERM_CC_FAT	GO:0031983~vesicle lumen	2	9.09091	0.0781947	7422, 2335	15	37	6387	23.0162	0.993579	0.513812	56.03
UP_SEQ_FEATURE	domain:Fibronectin type-III 4	2	9.09091	0.0805292	22862, 2335	22	35	8782	22.8104	0.999964	0.818613	61.9646
SP_PIR_KEYWORDS	ligase	3	13.6364	0.0822638	4522, 159, 84937	22	201	8789	5.96269	0.999933	0.798596	62.2099
GOTERM_CC_FAT	GO:0031091~platelet alpha granule	2	9.09091	0.086299	7422, 2335	15	41	6387	20.7707	0.996286	0.503143	59.7789
GOTERM_BP_FAT	GO:0018130~heterocycle biosynthetic process	2	9.09091	0.0882505	4522, 5092	17	39	6781	20.4555	1	0.998322	72.6256
GOTERM_BP_FAT	GO:0034330~cell junction organization	2	9.09091	0.0904142	2335, 4359	17	40	6781	19.9441	1	0.996369	73.5227
GOTERM_BP_FAT	GO:0008360~regulation of cell shape	2	9.09091	0.0904142	7422, 2335	17	40	6781	19.9441	1	0.996369	73.5227
GOTERM_MF_FAT	GO:0005525~GTP binding	3	13.6364	0.0932569	22931, 79363, 159	17	209	6445	5.44188	0.999865	0.988371	65.6049
SP_PIR_KEYWORDS	heparin-binding	2	9.09091	0.0936273	7422, 2335	22	41	8789	19.4878	0.999983	0.792552	67.1875
GOTERM_MF_FAT	GO:0019001~guanyl nucleotide binding	3	13.6364	0.0955502	22931, 79363, 159	17	212	6445	5.36487	0.999893	0.952467	66.5415
GOTERM_MF_FAT	GO:0032561~guanyl ribonucleotide binding	3	13.6364	0.0955502	22931, 79363, 159	17	212	6445	5.36487	0.999893	0.952467	66.5415
UCSC_TFBS	MYCMAX	17	77.2727	0.0956854	25953, 223, 22931, 22862, 5757, 2335, 159, 3159, 79814, 7422, 6696, 4522, 2941, 79363, 55715, 84937, 79583	22	5172	8618	1.28758	1	0.999849	70.8594

## Sheet: Sheet 7 Funct cluster DEG> BMSC
Annotation Cluster 1	Enrichment Score: 1.0827994988814447
Category	Term	Count	%	PValue	Genes	List Total	Pop Hits	Pop Total	Fold Enrichment	Bonferroni	Benjamini	FDR
GOTERM_CC_FAT	GO:0031982~vesicle	5	22.7273	0.013794	7422, 22862, 6696, 2335, 84937	15	450	6387	4.73111	0.577338	0.577338	13.0791
GOTERM_CC_FAT	GO:0030141~secretory granule	3	13.6364	0.024984	7422, 22862, 2335	15	114	6387	11.2053	0.791682	0.543581	22.5339
GOTERM_CC_FAT	GO:0031410~cytoplasmic vesicle	4	18.1818	0.0622188	7422, 22862, 2335, 84937	15	427	6387	3.98876	0.981366	0.630535	47.7047
GOTERM_CC_FAT	GO:0016023~cytoplasmic membrane-bounded vesicle	3	13.6364	0.190459	7422, 22862, 2335	15	367	6387	3.48065	0.999998	0.887332	88.1426
UCSC_TFBS	SRY	6	27.2727	0.943899	7422, 22862, 4522, 2335, 84937, 10144	22	3258	8618	0.721413	1	0.97199	100
Annotation Cluster 2	Enrichment Score: 0.984699369597803
Category	Term	Count	%	PValue	Genes	List Total	Pop Hits	Pop Total	Fold Enrichment	Bonferroni	Benjamini	FDR
GOTERM_CC_FAT	GO:0031982~vesicle	5	22.7273	0.013794	7422, 22862, 6696, 2335, 84937	15	450	6387	4.73111	0.577338	0.577338	13.0791
GOTERM_BP_FAT	GO:0003006~reproductive developmental process	3	13.6364	0.0453556	7422, 22862, 6696	17	146	6781	8.19621	1	0.998373	47.8416
GOTERM_CC_FAT	GO:0031988~membrane-bounded vesicle	4	18.1818	0.0475198	7422, 22862, 6696, 2335	15	383	6387	4.447	0.951127	0.634386	38.8178
GOTERM_BP_FAT	GO:0007155~cell adhesion	3	13.6364	0.213514	22862, 6696, 2335	17	367	6781	3.26062	1	1	96.5542
GOTERM_BP_FAT	GO:0022610~biological adhesion	3	13.6364	0.214395	22862, 6696, 2335	17	368	6781	3.25176	1	0.999999	96.6078
UCSC_TFBS	FOXO3	4	18.1818	0.907751	22862, 6696, 2335, 10144	22	2054	8618	0.762857	1	0.963487	100
Annotation Cluster 3	Enrichment Score: 0.7316452044157609
Category	Term	Count	%	PValue	Genes	List Total	Pop Hits	Pop Total	Fold Enrichment	Bonferroni	Benjamini	FDR
GOTERM_CC_FAT	GO:0031982~vesicle	5	22.7273	0.013794	7422, 22862, 6696, 2335, 84937	15	450	6387	4.73111	0.577338	0.577338	13.0791
GOTERM_BP_FAT	GO:0022604~regulation of cell morphogenesis	3	13.6364	0.017	7422, 6696, 2335	17	86	6781	13.9145	0.999188	0.971499	21.3716
GOTERM_CC_FAT	GO:0031988~membrane-bounded vesicle	4	18.1818	0.0475198	7422, 22862, 6696, 2335	15	383	6387	4.447	0.951127	0.634386	38.8178
KEGG_PATHWAY	hsa04510:Focal adhesion	3	13.6364	0.066066	7422, 6696, 2335	10	138	2873	6.24565	0.914615	0.914615	45.6447
UP_TISSUE	Kidney	5	22.7273	0.170025	7422, 6696, 2335, 3159, 79814	22	902	8634	2.17547	0.999995	0.983426	85.1239
GOTERM_CC_FAT	GO:0005615~extracellular space	3	13.6364	0.178444	7422, 6696, 2335	15	352	6387	3.62898	0.999995	0.912603	86.2419
GOTERM_CC_FAT	GO:0005576~extracellular region	4	18.1818	0.291878	7422, 6696, 1520, 2335	15	864	6387	1.9713	1	0.952969	96.9284
GOTERM_CC_FAT	GO:0044421~extracellular region part	3	13.6364	0.306657	7422, 6696, 2335	15	507	6387	2.51953	1	0.941474	97.5173
SP_PIR_KEYWORDS	glycoprotein	6	27.2727	0.403136	7422, 6696, 1520, 2335, 4359, 79583	22	1737	8789	1.37997	1	0.999741	99.712
SP_PIR_KEYWORDS	signal	5	22.7273	0.423307	7422, 6696, 1520, 2335, 4359	22	1378	8789	1.44956	1	0.998941	99.805
UP_SEQ_FEATURE	signal peptide	5	22.7273	0.423942	7422, 6696, 1520, 2335, 4359	22	1378	8782	1.44841	1	1	99.8254
UP_SEQ_FEATURE	disulfide bond	4	18.1818	0.480446	7422, 1520, 2335, 4359	22	1070	8782	1.49227	1	1	99.9468
SP_PIR_KEYWORDS	disulfide bond	4	18.1818	0.512038	7422, 1520, 2335, 4359	22	1120	8789	1.42679	1	0.999328	99.9707
SP_PIR_KEYWORDS	Secreted	3	13.6364	0.522775	7422, 6696, 2335	22	720	8789	1.66458	1	0.998997	99.9772
UP_SEQ_FEATURE	glycosylation site:N-linked (GlcNAc...)	5	22.7273	0.569878	7422, 6696, 1520, 2335, 79583	22	1639	8782	1.21776	1	1	99.994
Annotation Cluster 4	Enrichment Score: 0.6955013011304688
Category	Term	Count	%	PValue	Genes	List Total	Pop Hits	Pop Total	Fold Enrichment	Bonferroni	Benjamini	FDR
UP_SEQ_FEATURE	nucleotide phosphate-binding region:GTP	3	13.6364	0.0589787	22931, 79363, 159	22	166	8782	7.21413	0.999399	0.999399	50.337
SP_PIR_KEYWORDS	gtp-binding	3	13.6364	0.0712515	22931, 79363, 159	22	185	8789	6.47838	0.999746	0.984067	56.7386
GOTERM_MF_FAT	GO:0005525~GTP binding	3	13.6364	0.0932569	22931, 79363, 159	17	209	6445	5.44188	0.999865	0.999865	65.6049
GOTERM_MF_FAT	GO:0019001~guanyl nucleotide binding	3	13.6364	0.0955502	22931, 79363, 159	17	212	6445	5.36487	0.999893	0.989637	66.5415
GOTERM_MF_FAT	GO:0032561~guanyl ribonucleotide binding	3	13.6364	0.0955502	22931, 79363, 159	17	212	6445	5.36487	0.999893	0.989637	66.5415
SP_PIR_KEYWORDS	nucleotide-binding	4	18.1818	0.407424	22931, 4522, 79363, 159	22	961	8789	1.66285	1	0.999342	99.7346
GOTERM_MF_FAT	GO:0032553~ribonucleotide binding	4	18.1818	0.478249	22931, 4522, 79363, 159	17	1023	6445	1.48238	1	1	99.9169
GOTERM_MF_FAT	GO:0032555~purine ribonucleotide binding	4	18.1818	0.478249	22931, 4522, 79363, 159	17	1023	6445	1.48238	1	1	99.9169
GOTERM_MF_FAT	GO:0017076~purine nucleotide binding	4	18.1818	0.515296	22931, 4522, 79363, 159	17	1077	6445	1.40805	1	0.999998	99.9628
GOTERM_MF_FAT	GO:0000166~nucleotide binding	4	18.1818	0.645568	22931, 4522, 79363, 159	17	1284	6445	1.18105	1	1	99.9988
Annotation Cluster 5	Enrichment Score: 0.5923369178370581
Category	Term	Count	%	PValue	Genes	List Total	Pop Hits	Pop Total	Fold Enrichment	Bonferroni	Benjamini	FDR
GOTERM_BP_FAT	GO:0045941~positive regulation of transcription	3	13.6364	0.183918	7422, 5092, 3159	17	333	6781	3.59353	1	1	94.2155
GOTERM_BP_FAT	GO:0010628~positive regulation of gene expression	3	13.6364	0.191683	7422, 5092, 3159	17	342	6781	3.49897	1	1	94.9413
GOTERM_BP_FAT	GO:0045935~positive regulation of nucleobase, nucleoside, nucleotide and nucleic acid metabolic process	3	13.6364	0.214395	7422, 5092, 3159	17	368	6781	3.25176	1	0.999999	96.6078
GOTERM_BP_FAT	GO:0010557~positive regulation of macromolecule biosynthetic process	3	13.6364	0.226763	7422, 5092, 3159	17	382	6781	3.13258	1	0.999998	97.2846
GOTERM_BP_FAT	GO:0051173~positive regulation of nitrogen compound metabolic process	3	13.6364	0.229424	7422, 5092, 3159	17	385	6781	3.10817	1	0.999994	97.4127
GOTERM_BP_FAT	GO:0031328~positive regulation of cellular biosynthetic process	3	13.6364	0.247238	7422, 5092, 3159	17	405	6781	2.95468	1	0.999992	98.1362
GOTERM_BP_FAT	GO:0009891~positive regulation of biosynthetic process	3	13.6364	0.250814	7422, 5092, 3159	17	409	6781	2.92579	1	0.999981	98.2566
GOTERM_BP_FAT	GO:0010604~positive regulation of macromolecule metabolic process	3	13.6364	0.350322	7422, 5092, 3159	17	520	6781	2.30124	1	1	99.7637
GOTERM_BP_FAT	GO:0045449~regulation of transcription	4	18.1818	0.546258	22931, 7422, 5092, 3159	17	1182	6781	1.34986	1	1	99.9985
Annotation Cluster 6	Enrichment Score: 0.45512517140428876
Category	Term	Count	%	PValue	Genes	List Total	Pop Hits	Pop Total	Fold Enrichment	Bonferroni	Benjamini	FDR
UCSC_TFBS	AP2	9	40.9091	0.126782	25953, 7422, 5757, 79363, 159, 84937, 3159, 55715, 79583	22	2144	8618	1.64438	1	0.997345	81.0246
UCSC_TFBS	PAX5	14	63.6364	0.381159	25953, 22931, 5757, 2335, 5092, 159, 3159, 7422, 4522, 2941, 79363, 55715, 84937, 79583	22	4839	8618	1.13333	1	0.960448	99.7215
UCSC_TFBS	P53	12	54.5455	0.892197	25953, 22931, 7422, 22862, 5757, 4522, 79363, 2335, 84937, 3159, 55715, 79583	22	5438	8618	0.864422	1	0.960105	100
Annotation Cluster 7	Enrichment Score: 0.3445176951645706
Category	Term	Count	%	PValue	Genes	List Total	Pop Hits	Pop Total	Fold Enrichment	Bonferroni	Benjamini	FDR
UCSC_TFBS	CDPCR3	14	63.6364	0.217859	25953, 223, 22862, 5757, 2335, 159, 3159, 7422, 6696, 4522, 55715, 4359, 84937, 79583	22	4396	8618	1.24754	1	0.997852	95.0827
UCSC_TFBS	NFKB	13	59.0909	0.256832	25953, 223, 22862, 5757, 2335, 3159, 79814, 7422, 4522, 26355, 4359, 84937, 79583	22	4107	8618	1.23995	1	0.991106	97.3722
UCSC_TFBS	AP2REP	12	54.5455	0.2576	25953, 223, 7422, 22862, 5757, 4522, 5092, 2335, 159, 84937, 4359, 79583	22	3708	8618	1.26773	1	0.987014	97.4053
UCSC_TFBS	NCX	11	50	0.384015	25953, 223, 7422, 22862, 5757, 4522, 2335, 159, 84937, 4359, 10144	22	3634	8618	1.18575	1	0.956738	99.7368
UCSC_TFBS	CHOP	9	40.9091	0.815445	25953, 223, 7422, 4522, 2941, 2335, 159, 84937, 4359	22	3920	8618	0.899374	1	0.944932	100
UCSC_TFBS	GRE	8	36.3636	0.9197	25953, 223, 7422, 4522, 2335, 159, 55715, 10144	22	3971	8618	0.789176	1	0.965578	100
UCSC_TFBS	NRSF	9	40.9091	0.933724	25953, 223, 7422, 22862, 4522, 2335, 159, 84937, 79583	22	4486	8618	0.7859	1	0.967986	100
Annotation Cluster 8	Enrichment Score: 0.33291442511117547
Category	Term	Count	%	PValue	Genes	List Total	Pop Hits	Pop Total	Fold Enrichment	Bonferroni	Benjamini	FDR
UCSC_TFBS	CMYB	12	54.5455	0.211845	25953, 223, 7422, 4522, 79363, 5092, 2335, 84937, 4359, 55715, 79583, 79814	22	3572	8618	1.31599	1	0.999035	94.5986
UCSC_TFBS	STAT1	9	40.9091	0.595175	25953, 7422, 4522, 79363, 5092, 159, 84937, 79583, 79814	22	3314	8618	1.06383	1	0.957788	99.9985
UCSC_TFBS	MIF1	8	36.3636	0.795415	25953, 7422, 4522, 79363, 2335, 84937, 55715, 79583	22	3432	8618	0.913117	1	0.944565	100
Annotation Cluster 9	Enrichment Score: 0.3221138912184023
Category	Term	Count	%	PValue	Genes	List Total	Pop Hits	Pop Total	Fold Enrichment	Bonferroni	Benjamini	FDR
SP_PIR_KEYWORDS	disease mutation	5	22.7273	0.17089	25953, 4522, 5092, 2335, 4359	22	920	8789	2.1712	1	0.994738	88.049
UCSC_TFBS	CREL	4	18.1818	0.634963	25953, 2335, 4359, 79583	22	1302	8618	1.20346	1	0.952196	99.9996
UCSC_TFBS	ATF	3	13.6364	0.995847	25953, 2335, 4359	22	2681	8618	0.438337	1	0.996581	100
Annotation Cluster 10	Enrichment Score: 0.31907739009286573
Category	Term	Count	%	PValue	Genes	List Total	Pop Hits	Pop Total	Fold Enrichment	Bonferroni	Benjamini	FDR
UCSC_TFBS	AP2	9	40.9091	0.126782	25953, 7422, 5757, 79363, 159, 84937, 3159, 55715, 79583	22	2144	8618	1.64438	1	0.997345	81.0246
UCSC_TFBS	ROAZ	10	45.4545	0.615536	25953, 7422, 79363, 5092, 2335, 159, 84937, 3159, 55715, 79583	22	3771	8618	1.03879	1	0.952238	99.9992
UCSC_TFBS	SPZ1	7	31.8182	0.689067	7422, 79363, 159, 84937, 4359, 3159, 55715	22	2708	8618	1.01259	1	0.939216	99.9999
UCSC_TFBS	IRF2	5	22.7273	0.984277	7422, 84937, 3159, 55715, 79583	22	3312	8618	0.591376	1	0.988733	100
Annotation Cluster 11	Enrichment Score: 0.30218568380928706
Category	Term	Count	%	PValue	Genes	List Total	Pop Hits	Pop Total	Fold Enrichment	Bonferroni	Benjamini	FDR
UCSC_TFBS	AP1FJ	8	36.3636	0.367111	223, 7422, 5757, 4522, 2335, 3159, 55715, 79583	22	2408	8618	1.30142	1	0.964408	99.6332
UCSC_TFBS	ARNT	11	50	0.521494	223, 7422, 5757, 4522, 2335, 159, 26355, 84937, 3159, 79583, 79814	22	3955	8618	1.08951	1	0.956981	99.9881
UCSC_TFBS	NMYC	7	31.8182	0.647733	7422, 5757, 4522, 2335, 159, 3159, 79814	22	2609	8618	1.05101	1	0.949877	99.9997
Annotation Cluster 12	Enrichment Score: 0.27544366859501845
Category	Term	Count	%	PValue	Genes	List Total	Pop Hits	Pop Total	Fold Enrichment	Bonferroni	Benjamini	FDR
SP_PIR_KEYWORDS	hydrolase	4	18.1818	0.317592	25953, 4522, 1520, 79814	22	829	8789	1.92762	1	0.999202	98.6855
GOTERM_CC_FAT	GO:0005739~mitochondrion	3	13.6364	0.490083	25953, 4522, 79814	15	734	6387	1.74033	1	0.984636	99.8883
UCSC_TFBS	NFKAPPAB	5	22.7273	0.95836	25953, 4522, 26355, 4359, 79814	22	2916	8618	0.671686	1	0.976684	100
Annotation Cluster 13	Enrichment Score: 0.2621962129889704
Category	Term	Count	%	PValue	Genes	List Total	Pop Hits	Pop Total	Fold Enrichment	Bonferroni	Benjamini	FDR
GOTERM_CC_FAT	GO:0044459~plasma membrane part	4	18.1818	0.427927	22931, 2335, 84937, 4359	15	1076	6387	1.5829	1	0.978664	99.6433
UP_TISSUE	Lung	5	22.7273	0.518941	22931, 7422, 5757, 2335, 84937	22	1519	8634	1.29182	1	0.998992	99.9437
GOTERM_CC_FAT	GO:0005886~plasma membrane	4	18.1818	0.736078	22931, 2335, 84937, 4359	15	1635	6387	1.04171	1	0.998974	99.9999
Annotation Cluster 14	Enrichment Score: 0.26160080304191163
Category	Term	Count	%	PValue	Genes	List Total	Pop Hits	Pop Total	Fold Enrichment	Bonferroni	Benjamini	FDR
GOTERM_BP_FAT	GO:0006355~regulation of transcription, DNA-dependent	3	13.6364	0.536607	22931, 7422, 3159	17	743	6781	1.61056	1	1	99.9979
GOTERM_BP_FAT	GO:0045449~regulation of transcription	4	18.1818	0.546258	22931, 7422, 5092, 3159	17	1182	6781	1.34986	1	1	99.9985
GOTERM_BP_FAT	GO:0051252~regulation of RNA metabolic process	3	13.6364	0.559942	22931, 7422, 3159	17	774	6781	1.54606	1	1	99.999
Annotation Cluster 15	Enrichment Score: 0.2430662598184883
Category	Term	Count	%	PValue	Genes	List Total	Pop Hits	Pop Total	Fold Enrichment	Bonferroni	Benjamini	FDR
UP_TISSUE	Brain	13	59.0909	0.295806	25953, 223, 22931, 22862, 5757, 2335, 7422, 6696, 4522, 2941, 26355, 10144, 79583	22	4223	8634	1.20812	1	0.996931	97.2283
UCSC_TFBS	CREBP1	9	40.9091	0.793223	25953, 22931, 7422, 22862, 5757, 2335, 26355, 10144, 79583	22	3845	8618	0.916917	1	0.948481	100
UCSC_TFBS	ATF6	9	40.9091	0.795059	25953, 223, 7422, 22862, 5757, 4522, 2335, 26355, 79583	22	3851	8618	0.915488	1	0.947705	100
Annotation Cluster 16	Enrichment Score: 0.20797237081595085
Category	Term	Count	%	PValue	Genes	List Total	Pop Hits	Pop Total	Fold Enrichment	Bonferroni	Benjamini	FDR
UCSC_TFBS	NFKAPPAB50	7	31.8182	0.287932	25953, 7422, 2941, 2335, 84937, 3159, 79583	22	1853	8618	1.47981	1	0.963172	98.4441
UCSC_TFBS	P300	7	31.8182	0.840193	25953, 7422, 5757, 4522, 2335, 3159, 79583	22	3158	8618	0.8683	1	0.945925	100
UCSC_TFBS	RREB1	5	22.7273	0.982686	25953, 7422, 2335, 84937, 3159	22	3275	8618	0.598057	1	0.988163	100
Annotation Cluster 17	Enrichment Score: 0.19396845485149614
Category	Term	Count	%	PValue	Genes	List Total	Pop Hits	Pop Total	Fold Enrichment	Bonferroni	Benjamini	FDR
UCSC_TFBS	OLF1	13	59.0909	0.147535	25953, 223, 5757, 2335, 3159, 79814, 7422, 4522, 79363, 55715, 84937, 10144, 79583	22	3744	8618	1.36016	1	0.996253	85.8705
UCSC_TFBS	LHX3	9	40.9091	0.314795	7422, 22862, 4522, 6696, 2335, 159, 3159, 55715, 10144	22	2678	8618	1.31648	1	0.963404	99.029
UP_TISSUE	Epithelium	6	27.2727	0.38861	7422, 22862, 5757, 2335, 3159, 10144	22	1679	8634	1.40246	1	0.998489	99.3465
UCSC_TFBS	POU3F2	13	59.0909	0.426385	22931, 22862, 5757, 2335, 3159, 7422, 4522, 79363, 26355, 55715, 84937, 10144, 79583	22	4541	8618	1.12144	1	0.965054	99.8901
UCSC_TFBS	NKX25	14	63.6364	0.466555	25953, 22931, 22862, 5757, 2335, 159, 7422, 4522, 2941, 79363, 55715, 84937, 10144, 79583	22	5040	8618	1.08813	1	0.956803	99.9549
SP_PIR_KEYWORDS	phosphoprotein	12	54.5455	0.497682	25953, 22931, 22862, 5757, 4522, 6696, 2335, 84937, 4359, 3159, 55715, 10144	22	4389	8789	1.09228	1	0.999552	99.9592
UCSC_TFBS	E2F	13	59.0909	0.528571	25953, 22862, 5757, 2335, 3159, 4522, 1520, 79363, 26355, 55715, 84937, 10144, 79583	22	4779	8618	1.06559	1	0.956425	99.9901
UCSC_TFBS	BRACH	12	54.5455	0.561243	25953, 22931, 7422, 22862, 5757, 4522, 79363, 2335, 84937, 3159, 55715, 10144	22	4452	8618	1.05587	1	0.956459	99.9959
UCSC_TFBS	MZF1	11	50	0.580368	25953, 7422, 5757, 79363, 2335, 84937, 4359, 3159, 55715, 10144, 79583	22	4093	8618	1.05277	1	0.957826	99.9976
UCSC_TFBS	HAND1E47	10	45.4545	0.60473	25953, 7422, 22862, 5757, 79363, 5092, 2335, 84937, 55715, 10144	22	3745	8618	1.046	1	0.953335	99.9989
UCSC_TFBS	HMX1	10	45.4545	0.648933	25953, 7422, 22862, 5757, 4522, 2335, 84937, 3159, 55715, 10144	22	3853	8618	1.01668	1	0.9454	99.9997
UCSC_TFBS	OCT	9	40.9091	0.705911	223, 22862, 5757, 4522, 2941, 5092, 2335, 3159, 10144	22	3589	8618	0.98232	1	0.942485	100
UCSC_TFBS	SOX5	9	40.9091	0.765164	22931, 7422, 22862, 5757, 4522, 2335, 4359, 55715, 10144	22	3757	8618	0.938394	1	0.940229	100
UCSC_TFBS	PAX6	10	45.4545	0.836017	7422, 22862, 5757, 4522, 1520, 79363, 2335, 3159, 55715, 10144	22	4407	8618	0.888875	1	0.945127	100
UCSC_TFBS	PAX2	11	50	0.854972	25953, 7422, 22862, 5757, 4522, 79363, 2335, 84937, 4359, 3159, 55715	22	4884	8618	0.882269	1	0.949723	100
UCSC_TFBS	NFAT	7	31.8182	0.863555	7422, 22862, 5757, 4522, 26355, 55715, 10144	22	3251	8618	0.843461	1	0.950458	100
UCSC_TFBS	P53	12	54.5455	0.892197	25953, 22931, 7422, 22862, 5757, 4522, 79363, 2335, 84937, 3159, 55715, 79583	22	5438	8618	0.864422	1	0.960105	100
UCSC_TFBS	BRN2	8	36.3636	0.909051	223, 7422, 22862, 5757, 4522, 79363, 2335, 10144	22	3907	8618	0.802103	1	0.963249	100
UCSC_TFBS	HTF	9	40.9091	0.923654	25953, 22931, 7422, 22862, 5757, 4522, 55715, 10144, 79583	22	4417	8618	0.798176	1	0.966975	100
UCSC_TFBS	HFH3	6	27.2727	0.925566	7422, 22862, 5757, 4522, 2335, 55715	22	3123	8618	0.752598	1	0.967229	100
UCSC_TFBS	CREB	7	31.8182	0.928619	25953, 22931, 7422, 22862, 84937, 55715, 10144	22	3595	8618	0.762751	1	0.967349	100
UCSC_TFBS	SRY	6	27.2727	0.943899	7422, 22862, 4522, 2335, 84937, 10144	22	3258	8618	0.721413	1	0.97199	100
UCSC_TFBS	AREB6	15	68.1818	0.950676	25953, 22862, 5757, 2335, 3159, 79814, 7422, 4522, 1520, 79363, 55715, 4359, 84937, 10144, 79583	22	6848	8618	0.858047	1	0.974847	100
UCSC_TFBS	FREAC3	6	27.2727	0.951089	22862, 5757, 4522, 2335, 159, 10144	22	3321	8618	0.707728	1	0.974458	100
Annotation Cluster 18	Enrichment Score: 0.16681587899644848
Category	Term	Count	%	PValue	Genes	List Total	Pop Hits	Pop Total	Fold Enrichment	Bonferroni	Benjamini	FDR
UCSC_TFBS	FOXD3	8	36.3636	0.446957	22862, 5757, 4522, 2941, 2335, 159, 4359, 10144	22	2580	8618	1.21466	1	0.968419	99.9298
UCSC_TFBS	TATA	12	54.5455	0.464367	22931, 22862, 5757, 4522, 2941, 2335, 159, 84937, 4359, 55715, 10144, 79814	22	4226	8618	1.11233	1	0.959778	99.9526
UCSC_TFBS	MEIS1	10	45.4545	0.614294	7422, 22862, 5757, 4522, 2335, 159, 84937, 4359, 10144, 79814	22	3768	8618	1.03962	1	0.954379	99.9992
UCSC_TFBS	FOXJ2	13	59.0909	0.646987	22862, 5757, 2335, 159, 3159, 79814, 7422, 4522, 2941, 26355, 55715, 4359, 10144	22	5059	8618	1.00661	1	0.952021	99.9997
UCSC_TFBS	SOX9	9	40.9091	0.657833	22931, 22862, 5757, 4522, 6696, 2335, 159, 55715, 10144	22	3465	8618	1.01747	1	0.944278	99.9998
UCSC_TFBS	NKX22	9	40.9091	0.658234	22862, 5757, 4522, 6696, 2941, 2335, 159, 26355, 10144	22	3466	8618	1.01718	1	0.941967	99.9998
UCSC_TFBS	SOX5	9	40.9091	0.765164	22931, 7422, 22862, 5757, 4522, 2335, 4359, 55715, 10144	22	3757	8618	0.938394	1	0.940229	100
UCSC_TFBS	CDP	11	50	0.795337	223, 22862, 5757, 4522, 2941, 2335, 159, 26355, 84937, 55715, 10144	22	4670	8618	0.922698	1	0.94619	100
UCSC_TFBS	CART1	8	36.3636	0.832389	22862, 5757, 4522, 2941, 1520, 2335, 26355, 10144	22	3560	8618	0.880286	1	0.947596	100
UCSC_TFBS	CEBPB	10	45.4545	0.849723	25953, 22862, 5757, 4522, 2941, 2335, 159, 4359, 55715, 10144	22	4460	8618	0.878312	1	0.949614	100
UCSC_TFBS	FREAC3	6	27.2727	0.951089	22862, 5757, 4522, 2335, 159, 10144	22	3321	8618	0.707728	1	0.974458	100
Annotation Cluster 19	Enrichment Score: 0.16644215690836955
Category	Term	Count	%	PValue	Genes	List Total	Pop Hits	Pop Total	Fold Enrichment	Bonferroni	Benjamini	FDR
UCSC_TFBS	AHRARNT	12	54.5455	0.54248	25953, 223, 22931, 7422, 22862, 5757, 2941, 2335, 84937, 4359, 3159, 79583	22	4408	8618	1.06641	1	0.95851	99.9931
UCSC_TFBS	TCF11MAFG	11	50	0.64583	25953, 223, 22931, 22862, 4522, 2941, 2335, 84937, 4359, 3159, 79814	22	4252	8618	1.01341	1	0.953983	99.9997
UCSC_TFBS	YY1	13	59.0909	0.904006	25953, 223, 22931, 22862, 5757, 2335, 3159, 79814, 4522, 4359, 84937, 10144, 79583	22	5874	8618	0.866948	1	0.963386	100
Annotation Cluster 20	Enrichment Score: 0.13164847530044527
Category	Term	Count	%	PValue	Genes	List Total	Pop Hits	Pop Total	Fold Enrichment	Bonferroni	Benjamini	FDR
UCSC_TFBS	MAZR	6	27.2727	0.476777	25953, 7422, 5757, 4522, 84937, 3159	22	1842	8618	1.27598	1	0.957095	99.9644
UCSC_TFBS	RSRFC4	10	45.4545	0.542982	25953, 7422, 22862, 4522, 6696, 2335, 26355, 84937, 4359, 10144	22	3600	8618	1.08813	1	0.955592	99.9932
UCSC_TFBS	CP2	9	40.9091	0.599442	25953, 7422, 6696, 2335, 159, 84937, 3159, 55715, 10144	22	3324	8618	1.06063	1	0.953994	99.9987
UCSC_TFBS	S8	9	40.9091	0.622215	7422, 22862, 6696, 2335, 84937, 3159, 55715, 10144, 79814	22	3378	8618	1.04368	1	0.949642	99.9993
UCSC_TFBS	HMX1	10	45.4545	0.648933	25953, 7422, 22862, 5757, 4522, 2335, 84937, 3159, 55715, 10144	22	3853	8618	1.01668	1	0.9454	99.9997
UCSC_TFBS	ISRE	9	40.9091	0.67253	25953, 223, 7422, 5757, 2335, 84937, 4359, 3159, 10144	22	3502	8618	1.00672	1	0.941067	99.9999
UCSC_TFBS	HNF4	10	45.4545	0.678828	25953, 7422, 22862, 6696, 2335, 159, 84937, 3159, 10144, 79814	22	3929	8618	0.997015	1	0.941542	99.9999
UP_SEQ_FEATURE	splice variant	9	40.9091	0.71885	25953, 7422, 22862, 5757, 6696, 2335, 84937, 3159, 10144	22	3693	8782	0.972823	1	1	100
UCSC_TFBS	HSF1	6	27.2727	0.729598	25953, 7422, 2335, 84937, 4359, 10144	22	2381	8618	0.987133	1	0.942783	100
SP_PIR_KEYWORDS	alternative splicing	8	36.3636	0.85032	25953, 7422, 5757, 6696, 2335, 84937, 3159, 10144	22	3701	8789	0.86355	1	0.999998	100
UCSC_TFBS	HLF	6	27.2727	0.928404	1520, 2335, 84937, 3159, 55715, 10144	22	3142	8618	0.748047	1	0.968047	100
UCSC_TFBS	SRY	6	27.2727	0.943899	7422, 22862, 4522, 2335, 84937, 10144	22	3258	8618	0.721413	1	0.97199	100
UCSC_TFBS	BACH2	6	27.2727	0.96935	7422, 4522, 2335, 84937, 3159, 55715	22	3525	8618	0.66677	1	0.982386	100
UCSC_TFBS	RREB1	5	22.7273	0.982686	25953, 7422, 2335, 84937, 3159	22	3275	8618	0.598057	1	0.988163	100
UCSC_TFBS	RP58	6	27.2727	0.995293	25953, 22862, 159, 84937, 3159, 10144	22	4219	8618	0.55709	1	0.996235	100
Annotation Cluster 21	Enrichment Score: 0.12020421868612038
Category	Term	Count	%	PValue	Genes	List Total	Pop Hits	Pop Total	Fold Enrichment	Bonferroni	Benjamini	FDR
UCSC_TFBS	STAT	9	40.9091	0.376324	25953, 22862, 4522, 6696, 5092, 2335, 84937, 55715, 79583	22	2821	8618	1.24975	1	0.963296	99.6936
UCSC_TFBS	MIF1	8	36.3636	0.795415	25953, 7422, 4522, 79363, 2335, 84937, 55715, 79583	22	3432	8618	0.913117	1	0.944565	100
UCSC_TFBS	LMO2COM	11	50	0.829768	25953, 223, 22931, 7422, 4522, 79363, 2335, 26355, 84937, 10144, 79583	22	4788	8618	0.899958	1	0.947712	100
UCSC_TFBS	PPARA	10	45.4545	0.862182	25953, 223, 7422, 4522, 5092, 2335, 84937, 55715, 10144, 79583	22	4511	8618	0.868382	1	0.950994	100
UCSC_TFBS	CDPCR3HD	7	31.8182	0.936911	25953, 223, 4522, 79363, 2335, 26355, 84937	22	3655	8618	0.75023	1	0.969157	100
UCSC_TFBS	TCF11	8	36.3636	0.947033	25953, 22862, 4522, 1520, 79363, 2335, 84937, 55715	22	4172	8618	0.751155	1	0.973241	100
Annotation Cluster 22	Enrichment Score: 0.11711839945209254
Category	Term	Count	%	PValue	Genes	List Total	Pop Hits	Pop Total	Fold Enrichment	Bonferroni	Benjamini	FDR
UCSC_TFBS	AP1FJ	8	36.3636	0.367111	223, 7422, 5757, 4522, 2335, 3159, 55715, 79583	22	2408	8618	1.30142	1	0.964408	99.6332
UCSC_TFBS	ATF6	9	40.9091	0.795059	25953, 223, 7422, 22862, 5757, 4522, 2335, 26355, 79583	22	3851	8618	0.915488	1	0.947705	100
UCSC_TFBS	XBP1	9	40.9091	0.865138	25953, 223, 7422, 22862, 5757, 4522, 2335, 55715, 79814	22	4112	8618	0.85738	1	0.950048	100
UCSC_TFBS	BRN2	8	36.3636	0.909051	223, 7422, 22862, 5757, 4522, 79363, 2335, 10144	22	3907	8618	0.802103	1	0.963249	100
UCSC_TFBS	HFH3	6	27.2727	0.925566	7422, 22862, 5757, 4522, 2335, 55715	22	3123	8618	0.752598	1	0.967229	100
UCSC_TFBS	PAX3	7	31.8182	0.93328	223, 7422, 5757, 4522, 2335, 26355, 55715	22	3628	8618	0.755813	1	0.968512	100
Annotation Cluster 23	Enrichment Score: 0.11341072401827547
Category	Term	Count	%	PValue	Genes	List Total	Pop Hits	Pop Total	Fold Enrichment	Bonferroni	Benjamini	FDR
UCSC_TFBS	MZF1	11	50	0.580368	25953, 7422, 5757, 79363, 2335, 84937, 4359, 3159, 55715, 10144, 79583	22	4093	8618	1.05277	1	0.957826	99.9976
UCSC_TFBS	CREL	4	18.1818	0.634963	25953, 2335, 4359, 79583	22	1302	8618	1.20346	1	0.952196	99.9996
UCSC_TFBS	HSF1	6	27.2727	0.729598	25953, 7422, 2335, 84937, 4359, 10144	22	2381	8618	0.987133	1	0.942783	100
UCSC_TFBS	HOXA3	8	36.3636	0.758447	25953, 5757, 2335, 84937, 4359, 55715, 10144, 79583	22	3318	8618	0.94449	1	0.944473	100
UCSC_TFBS	ER	10	45.4545	0.760034	25953, 7422, 5092, 2335, 84937, 4359, 55715, 10144, 79583, 79814	22	4154	8618	0.943012	1	0.943353	100
UCSC_TFBS	ZID	9	40.9091	0.828838	25953, 7422, 79363, 2335, 159, 84937, 4359, 10144, 79583	22	3968	8618	0.888494	1	0.948707	100
UCSC_TFBS	GATA	8	36.3636	0.834272	25953, 223, 22862, 2335, 84937, 4359, 10144, 79583	22	3567	8618	0.878559	1	0.945658	100
UCSC_TFBS	MYOGNF1	8	36.3636	0.914168	25953, 223, 5092, 2335, 4359, 55715, 10144, 79583	22	3937	8618	0.795991	1	0.96424	100
UCSC_TFBS	FREAC4	6	27.2727	0.973211	2335, 159, 26355, 84937, 4359, 10144	22	3581	8618	0.656343	1	0.984509	100
Annotation Cluster 24	Enrichment Score: 0.11198121241121015
Category	Term	Count	%	PValue	Genes	List Total	Pop Hits	Pop Total	Fold Enrichment	Bonferroni	Benjamini	FDR
UCSC_TFBS	NMYC	7	31.8182	0.647733	7422, 5757, 4522, 2335, 159, 3159, 79814	22	2609	8618	1.05101	1	0.949877	99.9997
GOTERM_CC_FAT	GO:0043233~organelle lumen	3	13.6364	0.784404	7422, 2335, 3159	15	1233	6387	1.03601	1	0.999336	100
GOTERM_CC_FAT	GO:0031974~membrane-enclosed lumen	3	13.6364	0.794689	7422, 2335, 3159	15	1258	6387	1.01542	1	0.999099	100
UCSC_TFBS	SP1	5	22.7273	0.812048	7422, 5757, 2335, 3159, 79583	22	2165	8618	0.904682	1	0.946348	100
UCSC_TFBS	P300	7	31.8182	0.840193	25953, 7422, 5757, 4522, 2335, 3159, 79583	22	3158	8618	0.8683	1	0.945925	100
Annotation Cluster 25	Enrichment Score: 0.1088417188019092
Category	Term	Count	%	PValue	Genes	List Total	Pop Hits	Pop Total	Fold Enrichment	Bonferroni	Benjamini	FDR
UCSC_TFBS	IK1	8	36.3636	0.577659	25953, 22862, 4522, 1520, 79363, 159, 26355, 55715	22	2864	8618	1.09421	1	0.959618	99.9974
UCSC_TFBS	MRF2	9	40.9091	0.861863	25953, 22862, 4522, 1520, 2335, 159, 3159, 55715, 79814	22	4098	8618	0.860309	1	0.952104	100
UCSC_TFBS	TCF11	8	36.3636	0.947033	25953, 22862, 4522, 1520, 79363, 2335, 84937, 55715	22	4172	8618	0.751155	1	0.973241	100
Annotation Cluster 26	Enrichment Score: 0.10713779412757932
Category	Term	Count	%	PValue	Genes	List Total	Pop Hits	Pop Total	Fold Enrichment	Bonferroni	Benjamini	FDR
UCSC_TFBS	MEIS1	10	45.4545	0.614294	7422, 22862, 5757, 4522, 2335, 159, 84937, 4359, 10144, 79814	22	3768	8618	1.03962	1	0.954379	99.9992
UCSC_TFBS	HSF1	6	27.2727	0.729598	25953, 7422, 2335, 84937, 4359, 10144	22	2381	8618	0.987133	1	0.942783	100
UCSC_TFBS	IK3	9	40.9091	0.733607	25953, 7422, 22862, 79363, 2335, 84937, 4359, 10144, 79814	22	3665	8618	0.96195	1	0.936442	100
UCSC_TFBS	SOX5	9	40.9091	0.765164	22931, 7422, 22862, 5757, 4522, 2335, 4359, 55715, 10144	22	3757	8618	0.938394	1	0.940229	100
UCSC_TFBS	SRY	6	27.2727	0.943899	7422, 22862, 4522, 2335, 84937, 10144	22	3258	8618	0.721413	1	0.97199	100
UCSC_TFBS	TGIF	6	27.2727	0.958452	7422, 4522, 2335, 4359, 10144, 79814	22	3394	8618	0.692505	1	0.97615	100
Annotation Cluster 27	Enrichment Score: 0.07784041759578895
Category	Term	Count	%	PValue	Genes	List Total	Pop Hits	Pop Total	Fold Enrichment	Bonferroni	Benjamini	FDR
UP_SEQ_FEATURE	mutagenesis site	4	18.1818	0.607269	4522, 2335, 84937, 3159	22	1277	8782	1.25037	1	1	99.9979
UCSC_TFBS	BACH2	6	27.2727	0.96935	7422, 4522, 2335, 84937, 3159, 55715	22	3525	8618	0.66677	1	0.982386	100
UCSC_TFBS	NF1	4	18.1818	0.992241	4522, 2335, 3159, 55715	22	3051	8618	0.513572	1	0.99422	100
Annotation Cluster 28	Enrichment Score: 0.07218163511532934
Category	Term	Count	%	PValue	Genes	List Total	Pop Hits	Pop Total	Fold Enrichment	Bonferroni	Benjamini	FDR
UCSC_TFBS	FREAC2	6	27.2727	0.764339	223, 7422, 2941, 3159, 10144, 79583	22	2474	8618	0.950026	1	0.943544	100
UCSC_TFBS	NRF2	6	27.2727	0.814551	223, 7422, 79363, 3159, 55715, 79583	22	2626	8618	0.895036	1	0.94604	100
UCSC_TFBS	E47	9	40.9091	0.975553	25953, 223, 7422, 4522, 3159, 55715, 10144, 79583, 79814	22	4916	8618	0.717157	1	0.984856	100
Annotation Cluster 29	Enrichment Score: 0.06659779738166807
Category	Term	Count	%	PValue	Genes	List Total	Pop Hits	Pop Total	Fold Enrichment	Bonferroni	Benjamini	FDR
SP_PIR_KEYWORDS	membrane	7	31.8182	0.697428	25953, 22931, 22862, 26355, 84937, 4359, 79583	22	2783	8789	1.00485	1	0.999867	99.9999
UP_SEQ_FEATURE	transmembrane region	4	18.1818	0.890836	22862, 26355, 4359, 79583	22	2011	8782	0.793997	1	1	100
SP_PIR_KEYWORDS	transmembrane	4	18.1818	0.89354	22862, 26355, 4359, 79583	22	2025	8789	0.789136	1	1	100
GOTERM_CC_FAT	GO:0016021~integral to membrane	4	18.1818	0.907451	22862, 26355, 4359, 79583	15	2189	6387	0.778072	1	0.999947	100
GOTERM_CC_FAT	GO:0031224~intrinsic to membrane	4	18.1818	0.922097	22862, 26355, 4359, 79583	15	2268	6387	0.75097	1	0.999949	100
Annotation Cluster 30	Enrichment Score: 0.06347665785002775
Category	Term	Count	%	PValue	Genes	List Total	Pop Hits	Pop Total	Fold Enrichment	Bonferroni	Benjamini	FDR
SP_PIR_KEYWORDS	metal-binding	4	18.1818	0.681937	25953, 159, 84937, 79814	22	1418	8789	1.12694	1	0.999895	99.9998
GOTERM_MF_FAT	GO:0046914~transition metal ion binding	3	13.6364	0.865379	25953, 84937, 79814	17	1307	6445	0.870201	1	1	100
GOTERM_MF_FAT	GO:0046872~metal ion binding	4	18.1818	0.906795	25953, 159, 84937, 79814	17	1960	6445	0.773709	1	1	100
GOTERM_MF_FAT	GO:0043169~cation binding	4	18.1818	0.912072	25953, 159, 84937, 79814	17	1985	6445	0.763965	1	1	100
GOTERM_MF_FAT	GO:0043167~ion binding	4	18.1818	0.917102	25953, 159, 84937, 79814	17	2010	6445	0.754463	1	1	100
UCSC_TFBS	CETS1P54	4	18.1818	0.929466	25953, 7422, 84937, 79814	22	2178	8618	0.719426	1	0.967027	100

## Sheet: Sheet 8 IPA Funct DEG> BMSCvASC
Function analysis of Ingenuity Pathway Analysis for DEG more expressed in BMSC compare to ASC with overall tissue effect FDR=0.05 and post-hoc p-value<0.001
Category	B-H p-v	# Molecules	Molecules
Cellular Movement	0.00411	5	VEGFA FN1 SPP1 CTSS HMGA1
Immune Cell Trafficking	0.00411	5	VEGFA SPP1 FN1 CTSS MPZ
Cell-To-Cell Signaling and Interaction	0.00649	5	VEGFA SPP1 FN1 MPZ FNDC3A
Tissue Development	0.00649	5	VEGFA FN1 SPP1 MPZ FNDC3A
Connective Tissue Development and Function	0.00649	6	VEGFA FN1 SPP1 CTSS HMGA1 PTMA
Cellular Assembly and Organization	0.00649	7	VEGFA SPP1 FN1 DOK4 HMGA1 MPZ PTMA
Tissue Morphology	0.0105	5	VEGFA FN1 SPP1 CTSS MPZ
Cardiovascular System Development and Function	0.0121	4	VEGFA FN1 SPP1 CTSS
Cell Cycle	0.0121	4	VEGFA SPP1 FN1 HMGA1
Cellular Growth and Proliferation	0.0121	6	VEGFA SPP1 FN1 CTSS HMGA1 PTMA
Carbohydrate Metabolism	0.0122	3	VEGFA SPP1 FN1
Embryonic Development	0.0135	4	VEGFA SPP1 FN1 HMGA1
Skeletal and Muscular System Development and Function	0.0135	4	VEGFA SPP1 FN1 CTSS
Cellular Development	0.0135	5	VEGFA FN1 SPP1 HMGA1 PTMA
Nervous System Development and Function	0.0135	5	VEGFA SPP1 FN1 DOK4 MPZ
Cellular Function and Maintenance	0.0135	5	VEGFA SPP1 FN1 HMGA1 MPZ
Cell Morphology	0.0135	6	VEGFA FN1 SPP1 DOK4 HMGA1 MPZ
Hematological System Development and Function	0.0135	6	VEGFA SPP1 FN1 CTSS HMGA1 MPZ
Hair and Skin Development and Function	0.0143	4	VEGFA FN1 SPP1 MPZ
Organismal Development	0.0146	3	VEGFA FN1 CTSS
Organismal Functions	0.0146	3	VEGFA SPP1 FN1
Cell Signaling	0.0146	3	VEGFA FN1 SPP1
Organ Development	0.0146	3	VEGFA FN1 CTSS
Gene Expression	0.0146	4	VEGFA SPP1 FN1 HMGA1
Cellular Compromise	0.0146	4	VEGFA FN1 SPP1 MPZ
DNA Replication, Recombination, and Repair	0.0146	4	VEGFA FN1 CTSS HMGA1
Endocrine System Development and Function	0.0146	4	SPP1 FN1 CTSS HMGA1
Hematopoiesis	0.0146	4	VEGFA SPP1 FN1 HMGA1
Molecular Transport	0.0146	4	VEGFA FN1 SPP1 HMGA1
Tumor Morphology	0.0146	4	VEGFA FN1 CTSS HMGA1
Antigen Presentation	0.0146	5	VEGFA SPP1 FN1 CTSS MPZ
Small Molecule Biochemistry	0.0146	6	ADSS VEGFA SPP1 FN1 MTHFD1 ALDH9A1
Cell Death	0.0146	6	VEGFA SPP1 FN1 CTSS HMGA1 PTMA
Reproductive System Development and Function	0.0153	3	VEGFA SPP1 FN1
Post-Translational Modification	0.0163	3	VEGFA SPP1 FN1
Protein Synthesis	0.0175	3	VEGFA SPP1 FN1
Cell-mediated Immune Response	0.0175	4	VEGFA SPP1 FN1 HMGA1
Nucleic Acid Metabolism	0.021	3	VEGFA ADSS FN1

## Sheet: Sheet 9 Effect funct DEG > BMSC
Effect on function analysis of Ingenuity Pathway Analysis for DEG more expressed in BMSC compare to ASC with overall tissue effect FDR=0.05 and post-hoc p-value<0.001
Function Annotation	Molecules	# Molecules
affects apoptosis of normal cells (5/6)	CTSS, FN1, HMGA1, SPP1, VEGFA	5
decreases apoptosis of normal cells (3/6)	FN1, SPP1, VEGFA	3
increases apoptosis of normal cells (3/6)	FN1, PTMA, VEGFA	3
affects adhesion of cells (5/5)	FN1, FNDC3A, MPZ, SPP1, VEGFA	5
decreases adhesion of cells (2/5)	FN1, VEGFA	2
increases adhesion of cells (3/5)	FN1, SPP1, VEGFA	3
affects developmental process of T lymphocytes (3/5)	HMGA1, SPP1, VEGFA	3
decreases developmental process of T lymphocytes (1/5)	SPP1	1
increases developmental process of T lymphocytes (2/5)	FN1, PTMA	2
affects immune response (3/5)	CTSS, FN1, MPZ	3
increases immune response (4/5)	FN1, MPZ, SPP1, VEGFA	4
affects invasion of tumor cell lines (4/5)	CTSS, FN1, HMGA1, SPP1	4
increases invasion of tumor cell lines (3/5)	HMGA1, SPP1, VEGFA	3
affects proliferation of tumor cell lines (5/5)	FN1, HMGA1, PTMA, SPP1, VEGFA	5
decreases proliferation of tumor cell lines (1/5)	VEGFA	1
increases proliferation of tumor cell lines (3/5)	FN1, SPP1, VEGFA	3
affects activation of leukocytes (2/4)	FN1, MPZ	2
increases activation of leukocytes (4/4)	FN1, MPZ, SPP1, VEGFA	4
increases binding of DNA (4/4)	FN1, HMGA1, SPP1, VEGFA	4
affects cell movement of mononuclear leukocytes (2/4)	CTSS, FN1	2
decreases cell movement of mononuclear leukocytes (2/4)	FN1, VEGFA	2
increases cell movement of mononuclear leukocytes (2/4)	FN1, SPP1	2
affects collagen-induced arthritis of rodents (3/4)	CTSS, PTMA, SPP1	3
decreases collagen-induced arthritis of rodents (1/4)	FN1	1
increases collagen-induced arthritis of rodents (1/4)	FN1	1
affects inflammation (2/4)	CTSS, SPP1	2
increases inflammation (2/4)	PNKD (includes EG:25953), VEGFA	2
affects migration of monocytes (1/4)	CTSS	1
increases migration of monocytes (3/4)	FN1, SPP1, VEGFA	3
affects outgrowth of neurites (2/4)	FN1, MPZ	2
increases outgrowth of neurites (3/4)	DOK4, FN1, VEGFA	3
affects quantity of lymphocytes (3/4)	CTSS, MPZ, SPP1	3
increases quantity of lymphocytes (1/4)	VEGFA	1
decreases survival of tumor cell lines (1/4)	HMGA1	1
increases survival of tumor cell lines (3/4)	FN1, SPP1, VEGFA	3
affects T cell development (3/4)	HMGA1, SPP1, VEGFA	3
decreases T cell development (1/4)	SPP1	1
increases T cell development (1/4)	FN1	1
affects activation of T lymphocytes (2/3)	FN1, MPZ	2
increases activation of T lymphocytes (3/3)	FN1, MPZ, SPP1	3
affects adhesion of breast cancer cell lines (2/3)	FN1, SPP1	2
increases adhesion of breast cancer cell lines (1/3)	VEGFA	1
affects adhesion of endothelial cells (2/3)	SPP1, VEGFA	2
decreases adhesion of endothelial cells (1/3)	FN1	1
increases adhesion of endothelial cells (1/3)	SPP1	1
affects adhesion of fibroblast cell lines (1/3)	FN1	1
decreases adhesion of fibroblast cell lines (1/3)	FN1	1
increases adhesion of fibroblast cell lines (3/3)	FN1, SPP1, VEGFA	3
affects adhesion of leukocytes (2/3)	FN1, VEGFA	2
decreases adhesion of leukocytes (2/3)	FN1, VEGFA	2
increases adhesion of leukocytes (3/3)	FN1, SPP1, VEGFA	3
affects apoptosis of lymphocytes (1/3)	SPP1	1
decreases apoptosis of lymphocytes (2/3)	SPP1, VEGFA	2
increases apoptosis of lymphocytes (1/3)	FN1	1
affects apoptosis of neurons (2/3)	FN1, VEGFA	2
decreases apoptosis of neurons (1/3)	VEGFA	1
increases apoptosis of neurons (1/3)	PTMA	1
increases binding of carbohydrate (3/3)	FN1, SPP1, VEGFA	3
affects binding of tumor cell lines (1/3)	FN1	1
increases binding of tumor cell lines (2/3)	SPP1, VEGFA	2
affects cardiovascular process of tissue (1/3)	VEGFA	1
decreases cardiovascular process of tissue (1/3)	SPP1	1
increases cardiovascular process of tissue (2/3)	FN1, VEGFA	2
increases cell movement of breast cancer cell lines (3/3)	FN1, SPP1, VEGFA	3
affects cell movement of monocytes (1/3)	CTSS	1
decreases cell movement of monocytes (1/3)	VEGFA	1
increases cell movement of monocytes (1/3)	FN1	1
affects cell spreading of cell lines (1/3)	FN1	1
increases cell spreading of cell lines (3/3)	FN1, SPP1, VEGFA	3
affects chemotaxis of mononuclear leukocytes (1/3)	FN1	1
decreases chemotaxis of mononuclear leukocytes (2/3)	FN1, VEGFA	2
increases chemotaxis of mononuclear leukocytes (1/3)	SPP1	1
affects collagen-induced arthritis of mice (2/3)	CTSS, SPP1	2
decreases collagen-induced arthritis of mice (1/3)	FN1	1
increases collagen-induced arthritis of mice (1/3)	FN1	1
affects expression of protein (2/3)	FN1, SPP1	2
decreases expression of protein (1/3)	VEGFA	1
increases expression of protein (1/3)	FN1	1
affects growth of fibroblast cell lines (1/3)	HMGA1	1
decreases growth of fibroblast cell lines (1/3)	HMGA1	1
increases growth of fibroblast cell lines (3/3)	FN1, HMGA1, PTMA	3
affects healing (1/3)	FN1	1
decreases healing (1/3)	SPP1	1
increases healing (1/3)	VEGFA	1
affects infiltration of cells (2/3)	SPP1, VEGFA	2
decreases infiltration of cells (2/3)	FN1, VEGFA	2
increases infiltration of cells (1/3)	VEGFA	1
affects inflammation of organ (1/3)	CTSS	1
increases inflammation of organ (2/3)	PNKD (includes EG:25953), VEGFA	2
affects inhibition of apoptosis (3/3)	FN1, PTMA, VEGFA	3
affects invasion of breast cancer cell lines (3/3)	CTSS, FN1, SPP1	3
increases invasion of breast cancer cell lines (1/3)	SPP1	1
affects invasion of normal cells (1/3)	FN1	1
decreases invasion of normal cells (1/3)	FN1	1
increases invasion of normal cells (3/3)	FN1, SPP1, VEGFA	3
affects migration of breast cancer cell lines (2/3)	FN1, SPP1	2
decreases migration of breast cancer cell lines (1/3)	FN1	1
increases migration of breast cancer cell lines (2/3)	SPP1, VEGFA	2
affects migration of endothelial cells (2/3)	FN1, VEGFA	2
decreases migration of endothelial cells (3/3)	FN1, SPP1, VEGFA	3
increases migration of endothelial cells (3/3)	FN1, SPP1, VEGFA	3
affects migration of fibroblast cell lines (1/3)	FN1	1
increases migration of fibroblast cell lines (3/3)	FN1, SPP1, VEGFA	3
affects production of nitric oxide (1/3)	VEGFA	1
decreases production of nitric oxide (1/3)	SPP1	1
increases production of nitric oxide (2/3)	FN1, VEGFA	2
affects proliferation of breast cancer cell lines (2/3)	FN1, PTMA	2
increases proliferation of breast cancer cell lines (1/3)	VEGFA	1
increases proliferation of leukocyte cell lines (3/3)	FN1, SPP1, VEGFA	3
increases proliferation of muscle cells (3/3)	FN1, SPP1, VEGFA	3
affects quantity of focal adhesions (1/3)	FN1	1
decreases quantity of focal adhesions (1/3)	SPP1	1
increases quantity of focal adhesions (2/3)	FN1, VEGFA	2
affects quantity of macrophages (2/3)	CTSS, MPZ	2
increases quantity of macrophages (1/3)	VEGFA	1
affects quantity of T lymphocytes (3/3)	CTSS, MPZ, SPP1	3
affects rearrangement of cytoskeleton (1/3)	FN1	1
decreases rearrangement of cytoskeleton (1/3)	FN1	1
increases rearrangement of cytoskeleton (2/3)	SPP1, VEGFA	2
affects reorganization of cytoskeleton (1/3)	FN1	1
decreases reorganization of cytoskeleton (1/3)	SPP1	1
increases reorganization of cytoskeleton (2/3)	FN1, VEGFA	2
affects shape change of normal cells (1/3)	FN1	1
decreases shape change of normal cells (1/3)	SPP1	1
increases shape change of normal cells (2/3)	FN1, VEGFA	2
affects size of atherosclerotic lesion (1/3)	CTSS	1
increases size of atherosclerotic lesion (2/3)	SPP1, VEGFA	2
affects stimulation of normal cells (1/3)	FN1	1
increases stimulation of normal cells (3/3)	FN1, SPP1, VEGFA	3
affects transmigration of leukocytes (1/3)	CTSS	1
decreases transmigration of leukocytes (1/3)	VEGFA	1
increases transmigration of leukocytes (1/3)	FN1	1
affects tyrosine phosphorylation of protein (2/3)	FN1, SPP1	2
increases tyrosine phosphorylation of protein (3/3)	FN1, SPP1, VEGFA	3
increases activation of NFkB binding site (2/2)	FN1, VEGFA	2
increases adhesion of bone cell lines (2/2)	FN1, VEGFA	2
increases adhesion of endothelial cell lines (2/2)	SPP1, VEGFA	2
affects adhesion of leukemia cell lines (1/2)	FN1	1
increases adhesion of leukemia cell lines (2/2)	FN1, SPP1	2
increases adhesion of leukocyte cell lines (2/2)	FN1, VEGFA	2
affects adhesion of lymphoma cell lines (1/2)	FN1	1
increases adhesion of lymphoma cell lines (1/2)	VEGFA	1
affects adhesion of melanoma cell lines (1/2)	SPP1	1
increases adhesion of melanoma cell lines (1/2)	FN1	1
affects adhesion of smooth muscle cells (2/2)	FN1, SPP1	2
affects adhesion of T lymphocytes (1/2)	FN1	1
increases adhesion of T lymphocytes (2/2)	FN1, SPP1	2
increases angiogenesis of chorioallantoic membrane (2/2)	FN1, VEGFA	2
affects angiogenesis of endothelial cells (1/2)	VEGFA	1
decreases angiogenesis of endothelial cells (1/2)	FN1	1
increases angiogenesis of endothelial cells (1/2)	VEGFA	1
affects angiogenesis of tumor (2/2)	CTSS, VEGFA	2
affects apoptosis of cortical neurons (1/2)	VEGFA	1
increases apoptosis of cortical neurons (1/2)	PTMA	1
affects apoptosis of endothelial cell lines (1/2)	VEGFA	1
decreases apoptosis of endothelial cell lines (2/2)	SPP1, VEGFA	2
affects assembly of focal adhesions (1/2)	VEGFA	1
increases assembly of focal adhesions (2/2)	FN1, VEGFA	2
increases binding of glycosaminoglycan (2/2)	SPP1, VEGFA	2
affects branching morphogenesis (2/2)	FN1, VEGFA	2
increases branching morphogenesis (1/2)	FN1	1
decreases cardiovascular process of endothelial tissue (1/2)	SPP1	1
increases cardiovascular process of endothelial tissue (1/2)	VEGFA	1
affects cardiovascular process of heart (2/2)	SPP1, VEGFA	2
increases cardiovascular process of heart (1/2)	VEGFA	1
decreases cell death of pancreatic cancer cell lines (2/2)	FN1, SPP1	2
increases cell division process of endothelial cell lines (2/2)	SPP1, VEGFA	2
affects cell division process of endothelial cells (1/2)	FN1	1
increases cell division process of endothelial cells (1/2)	VEGFA	1
affects cell movement of connective tissue cells (1/2)	SPP1	1
increases cell movement of connective tissue cells (2/2)	FN1, SPP1	2
affects cell movement of endothelial cell lines (1/2)	VEGFA	1
increases cell movement of endothelial cell lines (2/2)	FN1, VEGFA	2
affects cell movement of leukocyte cell lines (1/2)	FN1	1
increases cell movement of leukocyte cell lines (1/2)	VEGFA	1
affects cell spreading of endothelial cell lines (1/2)	FN1	1
increases cell spreading of endothelial cell lines (1/2)	VEGFA	1
affects cell stage of endothelial cells (1/2)	FN1	1
increases cell stage of endothelial cells (1/2)	VEGFA	1
affects chemotaxis of T lymphocytes (1/2)	FN1	1
decreases chemotaxis of T lymphocytes (1/2)	FN1	1
increases chemotaxis of T lymphocytes (1/2)	SPP1	1
affects chemotaxis of tumor cell lines (2/2)	FN1, VEGFA	2
affects detachment of normal cells (2/2)	FN1, VEGFA	2
affects development of embryonic cell lines (1/2)	HMGA1	1
increases development of embryonic cell lines (1/2)	VEGFA	1
decreases development of endothelial tissue (1/2)	SPP1	1
increases development of endothelial tissue (1/2)	VEGFA	1
affects developmental process of epithelial cell lines (1/2)	SPP1	1
increases developmental process of epithelial cell lines (1/2)	PTMA	1
affects differentiation of endothelial cells (1/2)	VEGFA	1
decreases differentiation of endothelial cells (1/2)	FN1	1
increases differentiation of endothelial cells (1/2)	VEGFA	1
affects differentiation of hematopoietic progenitor cells (2/2)	HMGA1, VEGFA	2
increases differentiation of hematopoietic progenitor cells (1/2)	VEGFA	1
affects entry into S phase of cell lines (1/2)	FN1	1
increases entry into S phase of cell lines (1/2)	HMGA1	1
affects formation of bone (2/2)	SPP1, VEGFA	2
affects formation of endothelial cells (2/2)	FN1, VEGFA	2
increases formation of endothelial cells (1/2)	VEGFA	1
affects formation of endothelial tube (2/2)	FN1, VEGFA	2
increases formation of endothelial tube (1/2)	VEGFA	1
affects growth of skin cancer cell lines (1/2)	VEGFA	1
increases growth of skin cancer cell lines (1/2)	FN1	1
affects growth of skin cell lines (2/2)	SPP1, VEGFA	2
increases growth of skin cell lines (2/2)	SPP1, VEGFA	2
affects haptotaxis of tumor cell lines (2/2)	FN1, VEGFA	2
increases haptotaxis of tumor cell lines (1/2)	FN1	1
affects healing of lesion (1/2)	FN1	1
increases healing of lesion (1/2)	VEGFA	1
affects hematological process of eukaryotic cells (1/2)	HMGA1	1
increases hematological process of eukaryotic cells (1/2)	VEGFA	1
decreases incorporation of thymidine (1/2)	FN1	1
increases incorporation of thymidine (1/2)	VEGFA	1
affects inflammation of lung (1/2)	CTSS	1
increases inflammation of lung (1/2)	VEGFA	1
affects invasion of prostate cancer cell lines (2/2)	FN1, SPP1	2
increases invasion of prostate cancer cell lines (1/2)	SPP1	1
decreases lysis of cells (2/2)	SPP1, VEGFA	2
affects migration of brain cancer cell lines (2/2)	FN1, VEGFA	2
increases migration of brain cancer cell lines (2/2)	FN1, VEGFA	2
increases migration of brain cells (2/2)	FN1, VEGFA	2
affects migration of cancer cells (1/2)	FN1	1
increases migration of cancer cells (1/2)	VEGFA	1
affects migration of gonadal cell lines (2/2)	FN1, SPP1	2
affects migration of leukemia cell lines (1/2)	FN1	1
increases migration of leukemia cell lines (2/2)	FN1, VEGFA	2
affects migration of prostate cancer cell lines (2/2)	FN1, VEGFA	2
increases migration of prostate cancer cell lines (1/2)	FN1	1
affects migration of Schwann cells (1/2)	VEGFA	1
increases migration of Schwann cells (2/2)	FN1, VEGFA	2
affects organization of actin cytoskeleton (2/2)	FN1, VEGFA	2
increases organization of actin cytoskeleton (1/2)	FN1	1
affects proliferation of bone marrow cells (1/2)	SPP1	1
increases proliferation of bone marrow cells (2/2)	SPP1, VEGFA	2
decreases proliferation of microvascular endothelial cells (1/2)	FN1	1
increases proliferation of microvascular endothelial cells (2/2)	FN1, VEGFA	2
affects proliferation of nervous tissue cell lines (1/2)	VEGFA	1
increases proliferation of nervous tissue cell lines (1/2)	SPP1	1
decreases proliferation of tissue (1/2)	SPP1	1
increases proliferation of tissue (1/2)	VEGFA	1
affects quantity of actin stress fibers (1/2)	FN1	1
decreases quantity of actin stress fibers (1/2)	SPP1	1
increases quantity of actin stress fibers (1/2)	FN1	1
affects quantity of endothelial cell lines (2/2)	FN1, VEGFA	2
affects quantity of muscle cells (1/2)	CTSS	1
increases quantity of muscle cells (1/2)	VEGFA	1
decreases quantity of nitric oxide (1/2)	SPP1	1
increases quantity of nitric oxide (1/2)	VEGFA	1
affects quantity of osteoclasts (2/2)	SPP1, VEGFA	2
increases quantity of plasma membrane projections (2/2)	FN1, VEGFA	2
increases quantity of reactive oxygen species (2/2)	HMGA1, VEGFA	2
decreases re-entry into cell division process (1/2)	FN1	1
increases re-entry into cell division process (2/2)	FN1, VEGFA	2
decreases re-entry into cell stage (1/2)	FN1	1
increases re-entry into cell stage (2/2)	FN1, VEGFA	2
increases release of nitric oxide (2/2)	FN1, VEGFA	2
increases reorganization of actin (2/2)	FN1, VEGFA	2
affects resorption of bone (1/2)	SPP1	1
decreases resorption of bone (1/2)	VEGFA	1
increases resorption of bone (1/2)	SPP1	1
increases scattering of cell lines (2/2)	FN1, SPP1	2
affects size of tissue (2/2)	SPP1, VEGFA	2
increases size of tissue (1/2)	VEGFA	1
decreases sprouting of endothelial cells (1/2)	SPP1	1
increases sprouting of endothelial cells (1/2)	VEGFA	1
affects synovitis (2/2)	SPP1, VEGFA	2
affects systole (1/2)	SPP1	1
increases systole (1/2)	VEGFA	1
affects transmigration of monocytes (1/2)	CTSS	1
increases transmigration of monocytes (1/2)	FN1	1
increases accumulation of dendritic cells (1/1)	VEGFA	1
increases accumulation of endothelial cells (1/1)	VEGFA	1
affects accumulation of protein fragment (1/1)	FN1	1
increases activation of chondrocytes (1/1)	FN1	1
affects activation of latency active promoter 2 (1/1)	HMGA1	1
increases adherence of fibroblasts (1/1)	FN1	1
affects adhesion of astrocytes (1/1)	FN1	1
affects adhesion of glioma cells (1/1)	FN1	1
affects adhesion of hOB cells (1/1)	FN1	1
affects adhesion of neuroepithelial cells (1/1)	FN1	1
increases adhesion of pancreatic cancer cell lines (1/1)	FN1	1
affects adhesion of small cell lung cancer cells (1/1)	FN1	1
increases aggregation of focal adhesions (1/1)	VEGFA	1
increases angiogenesis of aortic ring tissue (1/1)	VEGFA	1
affects angiogenesis of bone (1/1)	VEGFA	1
increases angiogenesis of embryo (1/1)	VEGFA	1
increases angiogenesis of embryonic cell lines (1/1)	VEGFA	1
increases angiogenesis of endothelial tissue (1/1)	VEGFA	1
increases angiogenesis of granuloma (1/1)	VEGFA	1
increases angiogenesis of heart (1/1)	VEGFA	1
affects angiogenesis of islet cell tumor (1/1)	CTSS	1
affects angiogenesis of leg (1/1)	VEGFA	1
affects angiogenesis of lung cell lines (1/1)	VEGFA	1
affects angiogenesis of pancreatic carcinoma (1/1)	CTSS	1
increases angiogenesis of skeletal muscle (1/1)	VEGFA	1
increases angiogenesis of trachea (1/1)	VEGFA	1
increases angiogenesis of ulcer (1/1)	VEGFA	1
decreases anoikis of dermal fibroblasts (1/1)	FN1	1
affects anoikis of squamous cell carcinoma cell lines (1/1)	FN1	1
decreases area of muscle (1/1)	VEGFA	1
increases area of muscle (1/1)	VEGFA	1
affects arrest in mid-G1 phase of microvascular endothelial cells (1/1)	FN1	1
increases attachment of bone-marrow-derived monocyte/macrophage precursor cells (1/1)	FN1	1
increases attachment of epithelial cell lines (1/1)	FN1	1
increases attachment of fibroblast cell lines (1/1)	FN1	1
increases attachment of leukemia cell lines (1/1)	FN1	1
affects beta-adrenergic response of heart (1/1)	VEGFA	1
decreases binding of adipose cell lines (1/1)	FN1	1
decreases binding of AT rich element (1/1)	HMGA1	1
affects binding of focal adhesions (1/1)	FN1	1
affects binding of latency active promoter 2 (1/1)	HMGA1	1
increases binding of latency active promoter 2 (1/1)	HMGA1	1
increases binding of phosphatidylinositol 4,5-diphosphate (1/1)	FN1	1
affects biosynthesis of AMP (1/1)	ADSS	1
affects biosynthesis of carnitine (1/1)	ALDH9A1	1
affects biosynthesis of neurotransmitter (1/1)	ALDH9A1	1
affects branching morphogenesis of salivary gland (1/1)	FN1	1
increases branching morphogenesis of salivary gland (1/1)	FN1	1
increases branching of endothelial cells (1/1)	VEGFA	1
decreases cardiac output of rats (1/1)	VEGFA	1
increases cardiovascular process of liver (1/1)	VEGFA	1
affects catabolism of L-histidine (1/1)	MTHFD1	1
increases cell cycle progression of endothelial cell lines (1/1)	SPP1	1
decreases cell rounding of cervical cancer cell lines (1/1)	FN1	1
affects cell spreading of bone cancer cell lines (1/1)	FN1	1
affects cell spreading of breast cell lines (1/1)	FN1	1
increases cell spreading of eye cell lines (1/1)	FN1	1
affects cell spreading of muscle cell lines (1/1)	FN1	1
affects cell spreading of peritoneal macrophages (1/1)	FN1	1
increases cell spreading of skin cell lines (1/1)	SPP1	1
affects cell viability of endothelial cells (1/1)	VEGFA	1
increases cell viability of granule cells (1/1)	VEGFA	1
affects cell viability of Schwann cells (1/1)	VEGFA	1
increases cell viability of Schwann cells (1/1)	VEGFA	1
increases cell viability of trophoblast cells (1/1)	FN1	1
increases cell-cell adhesion of endothelial cell lines (1/1)	VEGFA	1
increases cell-cell adhesion of lymphoma cell lines (1/1)	VEGFA	1
increases chemoattraction of fibroblasts (1/1)	FN1	1
affects chemotaxis of lung cell lines (1/1)	FN1	1
affects chemotaxis of rhabdomyosarcoma cell lines (1/1)	FN1	1
affects circulation of embryonic tissue (1/1)	VEGFA	1
increases cleavage of cartilage tissue (1/1)	CTSS	1
affects collagen-induced arthritis of rats (1/1)	PTMA	1
affects collapse of blood vessel (1/1)	VEGFA	1
increases colony formation of leukemia cells (1/1)	VEGFA	1
increases colony formation of RPE cells (1/1)	VEGFA	1
affects compaction of myelin sheath (1/1)	MPZ	1
decreases cross-linkage of protein (1/1)	VEGFA	1
decreases damage of breast cancer cell lines (1/1)	SPP1	1
decreases damage of leukemia cell lines (1/1)	SPP1	1
affects degeneration of blood vessel (1/1)	SPP1	1
affects degeneration of Schwann cells (1/1)	MPZ	1
increases degradation of intercellular junctions (1/1)	VEGFA	1
affects delay in apoptosis of fibroblast cell lines (1/1)	FN1	1
affects delay in assembly of actin stress fibers (1/1)	FN1	1
affects delay in conduction of nerves (1/1)	MPZ	1
affects delay in expansion of melanoma cell lines (1/1)	VEGFA	1
affects delay in formation of focal adhesions (1/1)	FN1	1
affects delay in G2/M phase transition of endocrine cell lines (1/1)	HMGA1	1
affects delay in rearrangement of cytoskeleton (1/1)	FN1	1
affects density of vascular tissue (1/1)	VEGFA	1
increases deposition of granulation tissue (1/1)	VEGFA	1
decreases detachment of cervical cancer cell lines (1/1)	FN1	1
affects detachment of endothelial cells (1/1)	VEGFA	1
affects detachment of hematopoietic progenitor cells (1/1)	FN1	1
affects development of effector dendritic cells (1/1)	FN1	1
affects development of endocardium (1/1)	VEGFA	1
affects development of ossification zone (1/1)	VEGFA	1
affects diameter of axon bundle (1/1)	MPZ	1
increases differentiation of cobblestone area-forming cells (1/1)	VEGFA	1
increases differentiation of colony-forming erythroid cells (1/1)	VEGFA	1
increases differentiation of cord blood cells (1/1)	VEGFA	1
increases differentiation of long-term culture-initiating cells (1/1)	VEGFA	1
increases differentiation of podocytes (1/1)	SPP1	1
affects differentiation of pro-T lymphocytes (1/1)	HMGA1	1
increases differentiation of proplatelets (1/1)	FN1	1
increases disorganization of tight junctions (1/1)	VEGFA	1
increases dispersion of endocrine cell lines (1/1)	SPP1	1
increases dynamics of cell-matrix contacts (1/1)	FN1	1
increases emigration of Langerhans cells (1/1)	SPP1	1
affects entry into G1/S phase transition of microvascular endothelial cells (1/1)	FN1	1
increases entry into S phase of endocrine cell lines (1/1)	HMGA1	1
affects entry into S phase of skin cell lines (1/1)	FN1	1
increases epithelialization of wound (1/1)	VEGFA	1
affects erythropoiesis of cell lines (1/1)	HMGA1	1
affects expansion of endothelial progenitor cells (1/1)	VEGFA	1
increases expansion of lymph node (1/1)	VEGFA	1
increases extension of microvascular endothelial cells (1/1)	FN1	1
increases fenestration of capillary vessel (1/1)	VEGFA	1
decreases fibrogenesis of fibronectin matrix (1/1)	FN1	1
decreases formation of apoptosome (1/1)	PTMA	1
decreases formation of atrioventricular canal cushion (1/1)	VEGFA	1
increases formation of bone cell lines (1/1)	VEGFA	1
affects formation of capillary network (1/1)	VEGFA	1
affects formation of cell-matrix contacts (1/1)	FN1	1
affects formation of colony-forming granulocyte-macrophages (1/1)	VEGFA	1
increases formation of cord blood (1/1)	VEGFA	1
affects formation of dorsal aorta (1/1)	VEGFA	1
affects formation of islets of Langerhans (1/1)	CTSS	1
affects formation of perichondral bone (1/1)	SPP1	1
increases formation of vascular channel (1/1)	VEGFA	1
affects function of blood vessel (1/1)	FN1	1
affects G1/S phase transition of pancreatic cancer cell lines (1/1)	HMGA1	1
increases growth of capillary vessel (1/1)	VEGFA	1
increases growth of rhabdomyosarcoma cell lines (1/1)	VEGFA	1
increases growth of RPE cells (1/1)	VEGFA	1
affects growth of sarcoma cell lines (1/1)	HMGA1	1
increases haptotaxis of breast cancer cell lines (1/1)	FN1	1
affects haptotaxis of neuroblastoma cell lines (1/1)	FN1	1
decreases healing of endothelial tissue (1/1)	SPP1	1
increases healing of ulcer (1/1)	VEGFA	1
affects hematopoiesis of yolk sac (1/1)	VEGFA	1
increases hypoxia of epiphyseal cartilage (1/1)	VEGFA	1
increases infiltration by endothelial cell lines (1/1)	VEGFA	1
affects injury of DNA (1/1)	CTSS	1
increases integration of cDNA (1/1)	HMGA1	1
increases invasion of hybrid cells (1/1)	SPP1	1
increases invasion of microvascular endothelial cells (1/1)	VEGFA	1
increases invasion of smooth muscle cells (1/1)	SPP1	1
affects latency of nerves (1/1)	MPZ	1
affects length of muscle cells (1/1)	SPP1	1
increases lymphangiogenesis of cornea (1/1)	VEGFA	1
affects lymphangiogenesis of ear (1/1)	VEGFA	1
increases lymphangiogenesis of lymph node (1/1)	VEGFA	1
increases lymphangiogenesis of lymph vessel (1/1)	VEGFA	1
increases lymphangiogenesis of mice (1/1)	VEGFA	1
decreases lysis of endothelial cell lines (1/1)	VEGFA	1
affects maintenance of intercellular junctions (1/1)	MPZ	1
affects mass of cortical bone (1/1)	SPP1	1
affects mass of mitochondria (1/1)	HMGA1	1
decreases mass of mitochondria (1/1)	HMGA1	1
affects metabolism of carnitine (1/1)	ALDH9A1	1
affects migration of bone cell lines (1/1)	VEGFA	1
affects migration of intestinal cell lines (1/1)	FN1	1
increases migration of multiple myeloma cells (1/1)	VEGFA	1
increases migration of prostate cell lines (1/1)	FN1	1
increases migration of pyramidal neurons (1/1)	FN1	1
increases mitogenesis of endothelial cell lines (1/1)	VEGFA	1
increases mitogenesis of hepatic stellate cells (1/1)	VEGFA	1
increases mitogenesis of vascular endothelial cells (1/1)	VEGFA	1
increases mitosis of endothelial cells (1/1)	VEGFA	1
increases mobilization of endothelial progenitor cells (1/1)	VEGFA	1
increases mobilization of intracellular stores (1/1)	VEGFA	1
affects morphology of glomeruloid body (1/1)	VEGFA	1
affects morphology of microvessel (1/1)	VEGFA	1
affects morphology of paranodes (1/1)	MPZ	1
affects morphology of thyroid cells (1/1)	FN1	1
affects morphology of vasculature (1/1)	VEGFA	1
decreases multinucleation of alveolar macrophages (1/1)	SPP1	1
affects myelination of nervous system (1/1)	MPZ	1
decreases necrosis of cortical neurons (1/1)	PTMA	1
affects neovascularization of eye (1/1)	VEGFA	1
increases neovascularization of muscle (1/1)	VEGFA	1
affects neovascularization of skin (1/1)	VEGFA	1
affects neovascularization of wound (1/1)	VEGFA	1
increases neurological function of mice (1/1)	VEGFA	1
affects outgrowth of growth cone (1/1)	FN1	1
increases permeability of bone cell lines (1/1)	VEGFA	1
increases permeability of capillary vessel (1/1)	VEGFA	1
increases permeability of leukocyte cell lines (1/1)	VEGFA	1
increases permeability of vascular endothelial tissue (1/1)	VEGFA	1
increases permeabilization of capillary vessel (1/1)	VEGFA	1
increases permeabilization of endothelial tissue (1/1)	VEGFA	1
affects polyphasia of nerves (1/1)	MPZ	1
affects preservation of elastic lamina (1/1)	CTSS	1
increases production of capillary vessel (1/1)	VEGFA	1
increases production of microvessel (1/1)	VEGFA	1
increases production of protein (1/1)	VEGFA	1
affects proliferation of adrenal glomerulosa cells (1/1)	FN1	1
increases proliferation of adrenal glomerulosa cells (1/1)	FN1	1
increases proliferation of follicular cells (1/1)	VEGFA	1
affects proliferation of interstitial cells (1/1)	SPP1	1
affects proliferation of pancreatic cancer cells (1/1)	CTSS	1
increases proliferation of retinal pigment epithelium (1/1)	VEGFA	1
increases proliferation of rhabdomyosarcoma cell lines (1/1)	VEGFA	1
increases proliferation of vascular endothelial cells (1/1)	VEGFA	1
affects quantity of axon bundle (1/1)	MPZ	1
affects quantity of hemangioblasts (1/1)	VEGFA	1
affects quantity of Merkel cells (1/1)	MPZ	1
decreases quantity of microvascular endothelial cells (1/1)	VEGFA	1
affects quantity of microvessel (1/1)	VEGFA	1
increases quantity of microvessel (1/1)	VEGFA	1
increases quantity of satellite cells (1/1)	VEGFA	1
increases quantity of trabeculae carne (1/1)	VEGFA	1
decreases re-endothelialization of endothelial tissue (1/1)	SPP1	1
decreases re-entry into S phase of unspecified cell lines (1/1)	FN1	1
increases re-epithelialization of granulation tissue (1/1)	VEGFA	1
affects recovery of endothelial cell lines (1/1)	VEGFA	1
increases recruitment of endothelial progenitor cells (1/1)	VEGFA	1
increases recruitment of hematopoietic progenitor cells (1/1)	VEGFA	1
increases regeneration of glomerular capillary (1/1)	VEGFA	1
affects regression of blood vessel (1/1)	VEGFA	1
increases reinitiation of synthesis of DNA (1/1)	VEGFA	1
increases relaxation of arteriole (1/1)	VEGFA	1
increases release of proteoglycan (1/1)	FN1	1
affects release of specific granules (1/1)	FN1	1
affects remyelination of axons (1/1)	MPZ	1
increases reorganization of F-actin (1/1)	FN1	1
increases replacement of serum (1/1)	FN1	1
affects repopulation of hematopoietic progenitor cells (1/1)	VEGFA	1
increases repopulation of hematopoietic progenitor cells (1/1)	VEGFA	1
increases retention of cell-associated matrix (1/1)	SPP1	1
increases retention of lymphocytes (1/1)	FN1	1
increases retraction of pseudopodia (1/1)	FN1	1
decreases senescence of microvascular endothelial cells (1/1)	VEGFA	1
increases size of blood vessel tissue (1/1)	VEGFA	1
affects size of hair follicle (1/1)	VEGFA	1
increases size of hair shaft (1/1)	VEGFA	1
increases sprouting of neovessel (1/1)	VEGFA	1
affects stiffness of femur (1/1)	SPP1	1
affects stimulation of adrenal gland cells (1/1)	FN1	1
increases stimulation of endothelial tissue (1/1)	VEGFA	1
increases survival of carcinoma cells (1/1)	VEGFA	1
increases survival of neural precursor cells (1/1)	VEGFA	1
increases survival of satellite cells (1/1)	VEGFA	1
affects survival of skin cell lines (1/1)	SPP1	1
increases swelling of ankle joint (1/1)	FN1	1
affects systemic lupus erythematosus with renal impairment (1/1)	SPP1	1
increases systole of left ventricle (1/1)	VEGFA	1
increases targeting of endothelial cells (1/1)	VEGFA	1
increases thickness of aorta (1/1)	SPP1	1
affects torsional strength of bone (1/1)	SPP1	1
increases transcription of FGF-inducible response element (1/1)	FN1	1
affects transduction of multilineage progenitor cells (1/1)	FN1	1
decreases transformation of mesenchymal cells (1/1)	VEGFA	1
increases transport of nucleus (1/1)	FN1	1
increases tubulation of HAEC cells (1/1)	VEGFA	1
increases upregulation of Ca2+ (1/1)	VEGFA	1
increases upregulation of calcium (1/1)	VEGFA	1
affects vascularization of chorioallantoic membrane (1/1)	VEGFA	1
increases vascularization of mammary tumor (1/1)	VEGFA	1
increases vascularization of perifollicular epithelium (1/1)	VEGFA	1
increases vasodilation of rats (1/1)	VEGFA	1
affects vasodilation of vasculature (1/1)	VEGFA	1
decreases vasodilation of vasculature (1/1)	VEGFA	1
